# Supplementary material for: Sevoflurane postconditioning ameliorates cerebral ischemia-reperfusion injury in rats via TLR4/MyD88/TRAF6 signaling pathway
Source: publisher site journal article supplement (doi:10.18632/aging.204461), 2022-12-29
Supplement: Supplementary file [file aging-v14i24-204461-supplementary-material-SD1.pdf]

## SUPPLEMENTARY FIGURES

First time

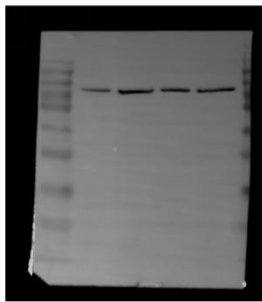

TLR4

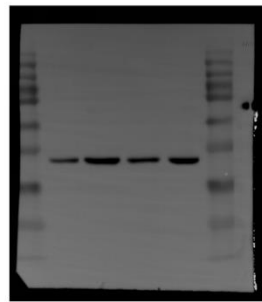

MyD88

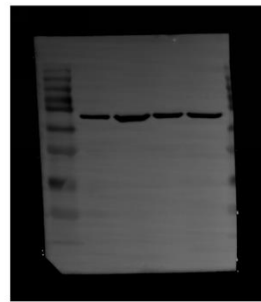

TRAF6

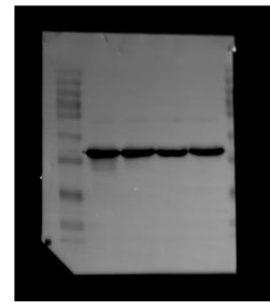

$\beta$ -actin

Second time

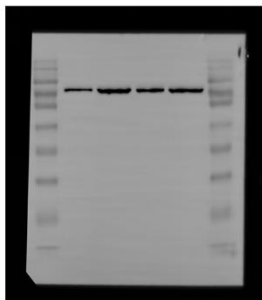

TLR4

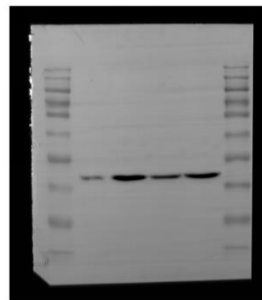

MyD88

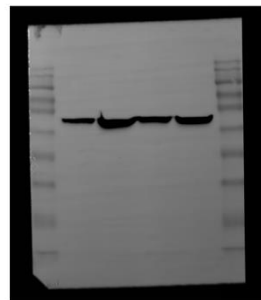

TRAF6

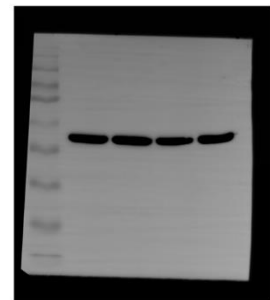

$\beta$ -actin

Third time

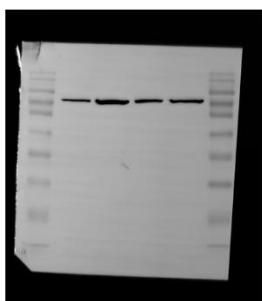

TLR4

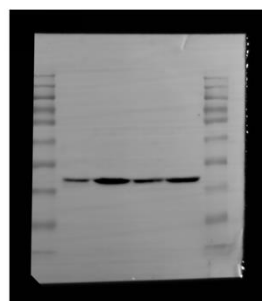

MyD88

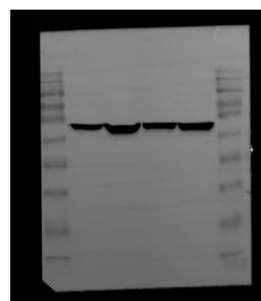

TRAF6

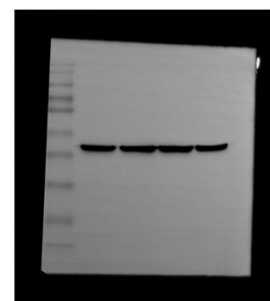

$\beta$ -actin

Supplementary Figure 1. Original stripe of Western blot.

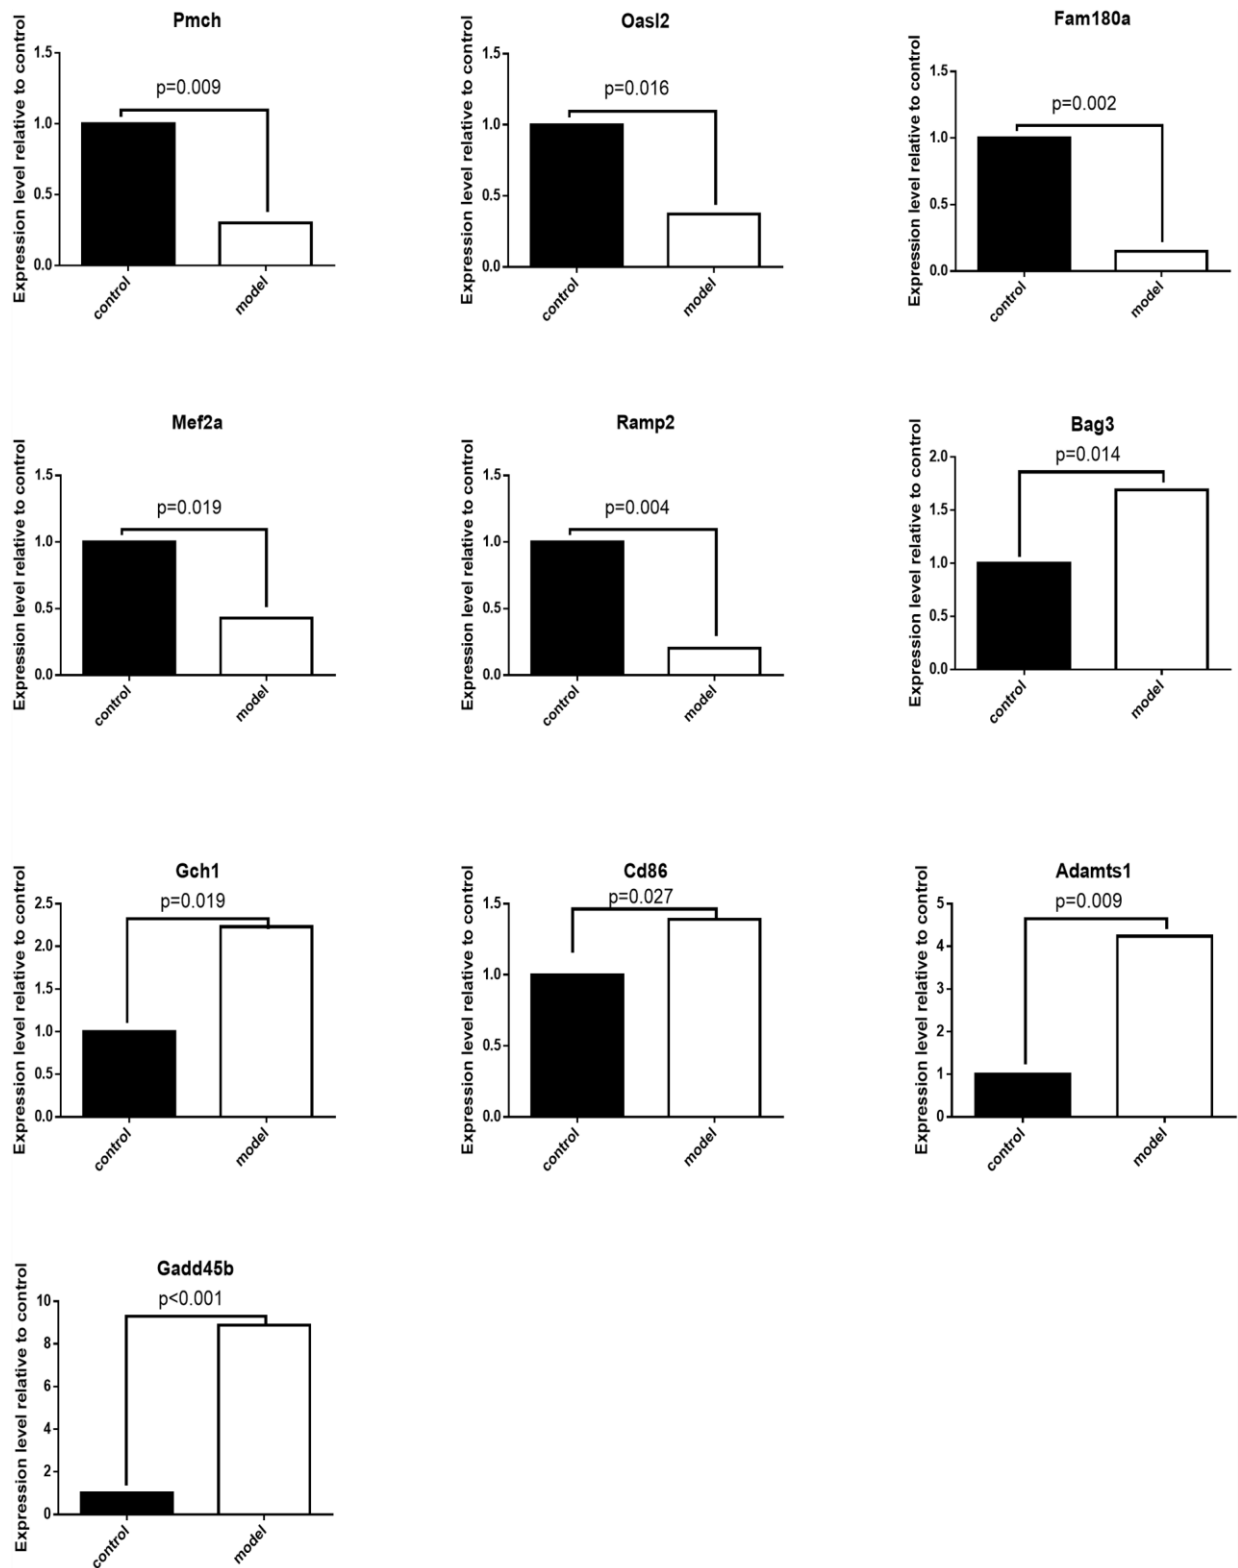

Supplementary Figure 2. Representative RT-PCR results of differential gene.
