# Supplementary material for: Sevoflurane postconditioning ameliorates cerebral ischemia-reperfusion injury in rats via TLR4/MyD88/TRAF6 signaling pathway
Source: Aging (Albany NY). 2022 Dec 29;14(24):10153–70. doi: 10.18632/aging.204461 (PMC9831726; doi:10.18632/aging.204461)
Supplement: Supplementary Table 1 [file aging-14-204461-s002.xlsx]

## Sheet: Supplemental Table 1
Supplementary Table 1. DEGs of cerebral I/R model.
	ID	Description	GeneRatio	BgRatio	pvalue	p.adjust	qvalue	geneID	Count
mmu05323	mmu05323	Rheumatoid arthritis	9/56	87/8979	2.57924e-09	4.17837e-07	2.76929e-07	Cxcl12/Flt1/Jun/Cd86/Tlr2/Il1a/Cxcl1/Fos/Ccl3	9
mmu05202	mmu05202	Transcriptional misregulation in cancer	11/56	224/8979	1.01118e-07	8.19057e-06	5.42845e-06	Flt1/Runx1t1/Dusp6/Cebpb/Cdkn1a/Mlf1/Cd86/Nfkbiz/Gadd45g/Gadd45b/Cd14	11
mmu04010	mmu04010	MAPK signaling pathway	11/56	294/8979	1.53996e-06	6.32541e-05	4.19228e-05	Flt1/Jun/Dusp6/Dusp1/Bdnf/Il1a/Gadd45g/Gadd45b/Cd14/Fos/Hspa1a	11
mmu04657	mmu04657	IL-17 signaling pathway	7/56	93/8979	1.56183e-06	6.32541e-05	4.19228e-05	Jun/Cebpb/Ccl7/Lcn2/Cxcl1/Fos/Fosb	7
mmu04620	mmu04620	Toll-like receptor signaling pathway	7/56	100/8979	2.55185e-06	8.268e-05	5.47977e-05	Jun/Cd86/Tlr2/Cd14/Fos/Ccl3/Ccl4	7
mmu04064	mmu04064	NF-kappa B signaling pathway	6/56	105/8979	4.47735e-05	0.00120888	0.000801209	Cxcl12/Gadd45g/Gadd45b/Cd14/Cxcl1/Ccl4	6
mmu04668	mmu04668	TNF signaling pathway	6/56	113/8979	6.76524e-05	0.00156567	0.00103768	Jun/Cebpb/Junb/Cxcl1/Socs3/Fos	6
mmu04380	mmu04380	Osteoclast differentiation	6/56	128/8979	0.000135172	0.00273724	0.00181415	Jun/Il1a/Junb/Socs3/Fos/Fosb	6
mmu04210	mmu04210	Apoptosis	6/56	136/8979	0.000188508	0.00336746	0.00223184	Prf1/Jun/Lmna/Gadd45g/Gadd45b/Fos	6
mmu05210	mmu05210	Colorectal cancer	5/56	88/8979	0.000207868	0.00336746	0.00223184	Jun/Cdkn1a/Gadd45g/Gadd45b/Fos	5
mmu04061	mmu04061	Viral protein interaction with cytokine and cytokine receptor	5/56	95/8979	0.000297427	0.00402786	0.00266953	Cxcl12/Ccl7/Cxcl1/Ccl3/Ccl4	5
mmu05418	mmu05418	Fluid shear stress and atherosclerosis	6/56	148/8979	0.00029836	0.00402786	0.00266953	Mef2a/Jun/Dusp1/Thbd/Il1a/Fos	6
mmu05417	mmu05417	Lipid and atherosclerosis	7/56	216/8979	0.000360356	0.00449059	0.00297622	Jun/Tlr2/Cd14/Cxcl1/Fos/Hspa1a/Ccl3	7
mmu05167	mmu05167	Kaposi sarcoma-associated herpesvirus infection	7/56	224/8979	0.000448891	0.00519431	0.00344263	Jun/Cdkn1a/Cd86/Rcan1/Zfp36/Cxcl1/Fos	7
mmu04928	mmu04928	Parathyroid hormone synthesis, secretion and action	5/56	108/8979	0.000538119	0.00550654	0.00364956	Mef2a/Pde4d/Egr1/Cdkn1a/Fos	5
mmu05134	mmu05134	Legionellosis	4/56	61/8979	0.000543856	0.00550654	0.00364956	Tlr2/Cd14/Cxcl1/Hspa1a	4
mmu05140	mmu05140	Leishmaniasis	4/56	70/8979	0.000916677	0.00873539	0.00578954	Jun/Tlr2/Il1a/Fos	4
mmu05223	mmu05223	Non-small cell lung cancer	4/56	72/8979	0.0010191	0.00917192	0.00607885	Rassf1/Cdkn1a/Gadd45g/Gadd45b	4
mmu05133	mmu05133	Pertussis	4/56	77/8979	0.00130999	0.0111694	0.0074027	Jun/Il1a/Cd14/Fos	4
mmu05216	mmu05216	Thyroid cancer	3/56	37/8979	0.00153646	0.0124453	0.00824834	Cdkn1a/Gadd45g/Gadd45b	3
mmu05162	mmu05162	Measles	5/56	146/8979	0.00208163	0.0151068	0.0100123	Jun/Tlr2/Il1a/Fos/Hspa1a	5
mmu04060	mmu04060	Cytokine-cytokine receptor interaction	7/56	292/8979	0.00211779	0.0151068	0.0100123	Cxcl12/Osm/Ccl7/Il1a/Cxcl1/Ccl3/Ccl4	7
mmu05224	mmu05224	Breast cancer	5/56	147/8979	0.0021448	0.0151068	0.0100123	Jun/Cdkn1a/Gadd45g/Gadd45b/Fos	5
mmu05030	mmu05030	Cocaine addiction	3/56	48/8979	0.00325852	0.0217548	0.0144184	Jun/Bdnf/Fosb	3
mmu05161	mmu05161	Hepatitis B	5/56	163/8979	0.00335722	0.0217548	0.0144184	Jun/Cdkn1a/Tlr2/Egr2/Fos	5
mmu04933	mmu04933	AGE-RAGE signaling pathway in diabetic complications	4/56	101/8979	0.00353909	0.0220512	0.0146149	Jun/Thbd/Egr1/Il1a	4
mmu05142	mmu05142	Chagas disease	4/56	103/8979	0.00379732	0.0227839	0.0151005	Jun/Tlr2/Fos/Ccl3	4
mmu05166	mmu05166	Human T-cell leukemia virus 1 infection	6/56	250/8979	0.00444312	0.0257066	0.0170375	Jun/Egr1/Cdkn1a/Egr2/Zfp36/Fos	6
mmu05213	mmu05213	Endometrial cancer	3/56	58/8979	0.00556349	0.0303205	0.0200955	Cdkn1a/Gadd45g/Gadd45b	3
mmu04218	mmu04218	Cellular senescence	5/56	184/8979	0.00561492	0.0303205	0.0200955	Zfp36l1/Cdkn1a/Il1a/Gadd45g/Gadd45b	5
mmu05321	mmu05321	Inflammatory bowel disease	3/56	62/8979	0.00670061	0.0333762	0.0221207	Jun/Tlr2/Il1a	3
mmu04062	mmu04062	Chemokine signaling pathway	5/56	192/8979	0.00670567	0.0333762	0.0221207	Cxcl12/Ccl7/Cxcl1/Ccl3/Ccl4	5
mmu05217	mmu05217	Basal cell carcinoma	3/56	63/8979	0.00700489	0.0333762	0.0221207	Cdkn1a/Gadd45g/Gadd45b	3
mmu05332	mmu05332	Graft-versus-host disease	3/56	63/8979	0.00700489	0.0333762	0.0221207	Prf1/Cd86/Il1a	3
mmu04068	mmu04068	FoxO signaling pathway	4/56	131/8979	0.00885081	0.0399229	0.0264596	Fbxo25/Cdkn1a/Gadd45g/Gadd45b	4
mmu05031	mmu05031	Amphetamine addiction	3/56	69/8979	0.00900257	0.0399229	0.0264596	Jun/Fos/Fosb	3
mmu04940	mmu04940	Type I diabetes mellitus	3/56	70/8979	0.00936462	0.0399229	0.0264596	Prf1/Cd86/Il1a	3
mmu05221	mmu05221	Acute myeloid leukemia	3/56	70/8979	0.00936462	0.0399229	0.0264596	Runx1t1/Dusp6/Cd14	3
mmu04115	mmu04115	p53 signaling pathway	3/56	72/8979	0.0101141	0.040962	0.0271483	Cdkn1a/Gadd45g/Gadd45b	3
mmu05218	mmu05218	Melanoma	3/56	72/8979	0.0101141	0.040962	0.0271483	Cdkn1a/Gadd45g/Gadd45b	3
mmu05214	mmu05214	Glioma	3/56	74/8979	0.0108975	0.0430586	0.0285378	Cdkn1a/Gadd45g/Gadd45b	3
mmu05212	mmu05212	Pancreatic cancer	3/56	76/8979	0.0117153	0.0441368	0.0292525	Cdkn1a/Gadd45g/Gadd45b	3
mmu05220	mmu05220	Chronic myeloid leukemia	3/56	76/8979	0.0117153	0.0441368	0.0292525	Cdkn1a/Gadd45g/Gadd45b	3
mmu05169	mmu05169	Epstein-Barr virus infection	5/56	231/8979	0.014206	0.052304	0.0346655	Jun/Cdkn1a/Tlr2/Gadd45g/Gadd45b	5
mmu04921	mmu04921	Oxytocin signaling pathway	4/56	153/8979	0.0149941	0.0539788	0.0357754	Jun/Cdkn1a/Rcan1/Fos	4
mmu04932	mmu04932	Non-alcoholic fatty liver disease	4/56	156/8979	0.0159972	0.056338	0.037339	Jun/Il1a/Socs3/Fos	4
mmu05235	mmu05235	PD-L1 expression and PD-1 checkpoint pathway in cancer	3/56	88/8979	0.017355	0.0598194	0.0396464	Jun/Tlr2/Fos	3
mmu01522	mmu01522	Endocrine resistance	3/56	93/8979	0.0200811	0.0656972	0.043542	Jun/Cdkn1a/Fos	3
mmu05222	mmu05222	Small cell lung cancer	3/56	93/8979	0.0200811	0.0656972	0.043542	Cdkn1a/Gadd45g/Gadd45b	3
mmu05132	mmu05132	Salmonella infection	5/56	253/8979	0.0202769	0.0656972	0.043542	Jun/Tlr2/Tubb6/Cd14/Fos	5
mmu05152	mmu05152	Tuberculosis	4/56	180/8979	0.025554	0.0811714	0.0537978	Cebpb/Tlr2/Il1a/Cd14	4
mmu05219	mmu05219	Bladder cancer	2/56	41/8979	0.0268195	0.083553	0.0553763	Rassf1/Cdkn1a	2
mmu05146	mmu05146	Amoebiasis	3/56	107/8979	0.0289043	0.0879053	0.0582608	Tlr2/Cd14/Cxcl1	3
mmu04672	mmu04672	Intestinal immune network for IgA production	2/56	43/8979	0.0293018	0.0879053	0.0582608	Cxcl12/Cd86	2
mmu04066	mmu04066	HIF-1 signaling pathway	3/56	114/8979	0.0339723	0.100064	0.0663192	Flt1/Cdkn1a/Timp1	3
mmu04935	mmu04935	Growth hormone synthesis, secretion and action	3/56	116/8979	0.0355	0.102697	0.068064	Junb/Socs3/Fos	3
mmu04110	mmu04110	Cell cycle	3/56	125/8979	0.0428084	0.121666	0.0806362	Cdkn1a/Gadd45g/Gadd45b	3
mmu04978	mmu04978	Mineral absorption	2/56	54/8979	0.0444664	0.124199	0.0823154	Slc30a1/Mt2	2
mmu04024	mmu04024	cAMP signaling pathway	4/56	220/8979	0.0478698	0.131439	0.0871137	Jun/Pde4d/Bdnf/Fos	4
mmu05144	mmu05144	Malaria	2/56	57/8979	0.049013	0.132335	0.0877074	Tlr2/Hba-a1	2
mmu04915	mmu04915	Estrogen signaling pathway	3/56	134/8979	0.0508143	0.13495	0.0894403	Jun/Fos/Hspa1a	3
mmu05330	mmu05330	Allograft rejection	2/56	63/8979	0.0585832	0.153072	0.101451	Prf1/Cd86	2
mmu05226	mmu05226	Gastric cancer	3/56	150/8979	0.0667063	0.169619	0.112418	Cdkn1a/Gadd45g/Gadd45b	3
mmu05211	mmu05211	Renal cell carcinoma	2/56	68/8979	0.0670101	0.169619	0.112418	Jun/Cdkn1a	2
mmu04151	mmu04151	PI3K-Akt signaling pathway	5/56	359/8979	0.0721378	0.17979	0.119159	Flt1/Osm/Cdkn1a/Tlr2/Bdnf	5
mmu05163	mmu05163	Human cytomegalovirus infection	4/56	256/8979	0.0749336	0.183928	0.121902	Cxcl12/Cdkn1a/Ccl3/Ccl4	4
mmu04917	mmu04917	Prolactin signaling pathway	2/56	74/8979	0.0776168	0.187671	0.124382	Socs3/Fos	2
mmu05020	mmu05020	Prion disease	4/56	268/8979	0.0853831	0.201271	0.133396	Egr1/Tubb6/Il1a/Hspa1a	4
mmu05320	mmu05320	Autoimmune thyroid disease	2/56	79/8979	0.0868326	0.201271	0.133396	Prf1/Cd86	2
mmu04630	mmu04630	JAK-STAT signaling pathway	3/56	168/8979	0.0869688	0.201271	0.133396	Osm/Cdkn1a/Socs3	3
mmu04662	mmu04662	B cell receptor signaling pathway	2/56	81/8979	0.0906078	0.206321	0.136743	Jun/Fos	2
mmu04141	mmu04141	Protein processing in endoplasmic reticulum	3/56	172/8979	0.091792	0.206321	0.136743	Dnajb1/Ppp1r15a/Hspa1a	3
mmu05164	mmu05164	Influenza A	3/56	173/8979	0.0930152	0.206321	0.136743	Dnajb1/Il1a/Socs3	3
mmu05225	mmu05225	Hepatocellular carcinoma	3/56	174/8979	0.0942452	0.206321	0.136743	Cdkn1a/Gadd45g/Gadd45b	3
mmu04012	mmu04012	ErbB signaling pathway	2/56	84/8979	0.0963604	0.208138	0.137947	Jun/Cdkn1a	2
mmu04658	mmu04658	Th1 and Th2 cell differentiation	2/56	88/8979	0.104189	0.216679	0.143608	Jun/Fos	2
mmu05416	mmu05416	Viral myocarditis	2/56	88/8979	0.104189	0.216679	0.143608	Prf1/Cd86	2
mmu04145	mmu04145	Phagosome	3/56	182/8979	0.104327	0.216679	0.143608	Tlr2/Tubb6/Cd14	3
mmu04912	mmu04912	GnRH signaling pathway	2/56	90/8979	0.108167	0.221812	0.14701	Jun/Egr1	2
mmu04640	mmu04640	Hematopoietic cell lineage	2/56	94/8979	0.116245	0.235395	0.156013	Il1a/Cd14	2
mmu04713	mmu04713	Circadian entrainment	2/56	98/8979	0.124472	0.245908	0.16298	Per1/Fos	2
mmu05231	mmu05231	Choline metabolism in cancer	2/56	98/8979	0.124472	0.245908	0.16298	Jun/Fos	2
mmu04660	mmu04660	T cell receptor signaling pathway	2/56	103/8979	0.134949	0.263394	0.174569	Jun/Fos	2
mmu04659	mmu04659	Th17 cell differentiation	2/56	105/8979	0.139195	0.268447	0.177918	Jun/Fos	2
mmu05145	mmu05145	Toxoplasmosis	2/56	110/8979	0.149937	0.283155	0.187666	Tlr2/Hspa1a	2
mmu00790	mmu00790	Folate biosynthesis	1/56	26/8979	0.150317	0.283155	0.187666	Gch1	1
mmu04625	mmu04625	C-type lectin receptor signaling pathway	2/56	112/8979	0.15428	0.286503	0.189885	Jun/Egr2	2
mmu04392	mmu04392	Hippo signaling pathway - multiple species	1/56	27/8979	0.155631	0.286503	0.189885	Rassf1	1
mmu05203	mmu05203	Viral carcinogenesis	3/56	229/8979	0.171067	0.308484	0.204454	Jun/Cdkn1a/Egr2	3
mmu04710	mmu04710	Circadian rhythm	1/56	30/8979	0.17138	0.308484	0.204454	Per1	1
mmu04722	mmu04722	Neurotrophin signaling pathway	2/56	121/8979	0.174117	0.30937	0.20504	Jun/Bdnf	2
mmu04014	mmu04014	Ras signaling pathway	3/56	232/8979	0.175691	0.30937	0.20504	Flt1/Rassf1/Bdnf	3
mmu05170	mmu05170	Human immunodeficiency virus 1 infection	3/56	240/8979	0.188196	0.327826	0.217272	Jun/Tlr2/Fos	3
mmu04926	mmu04926	Relaxin signaling pathway	2/56	129/8979	0.192084	0.331039	0.219402	Jun/Fos	2
mmu05171	mmu05171	Coronavirus disease - COVID-19	3/56	247/8979	0.199328	0.339907	0.225279	Jun/Tlr2/Fos	3
mmu05135	mmu05135	Yersinia infection	2/56	134/8979	0.203441	0.343306	0.227532	Jun/Fos	2
mmu04371	mmu04371	Apelin signaling pathway	2/56	137/8979	0.210293	0.351211	0.232771	Mef2a/Egr1	2
mmu05143	mmu05143	African trypanosomiasis	1/56	39/8979	0.216916	0.358575	0.237652	Hba-a1	1
mmu04936	mmu04936	Alcoholic liver disease	2/56	141/8979	0.219467	0.359128	0.238018	Cd14/Cxcl1	2
mmu04216	mmu04216	Ferroptosis	1/56	40/8979	0.221821	0.35935	0.238166	Sat1	1
mmu04270	mmu04270	Vascular smooth muscle contraction	2/56	144/8979	0.226372	0.363092	0.240646	Avp/Ramp2	2
mmu04962	mmu04962	Vasopressin-regulated water reabsorption	1/56	44/8979	0.241142	0.38299	0.253834	Avp	1
mmu04930	mmu04930	Type II diabetes mellitus	1/56	48/8979	0.259992	0.408919	0.271018	Socs3	1
mmu05160	mmu05160	Hepatitis C	2/56	165/8979	0.275034	0.428418	0.283942	Cdkn1a/Socs3	2
mmu00330	mmu00330	Arginine and proline metabolism	1/56	54/8979	0.287407	0.443428	0.29389	Sat1	1
mmu04213	mmu04213	Longevity regulating pathway - multiple species	1/56	62/8979	0.322414	0.492746	0.326576	Hspa1a	1
mmu04623	mmu04623	Cytosolic DNA-sensing pathway	1/56	63/8979	0.326669	0.494583	0.327794	Ccl4	1
mmu04137	mmu04137	Mitophagy - animal	1/56	68/8979	0.347555	0.521333	0.345523	Jun	1
mmu04510	mmu04510	Focal adhesion	2/56	201/8979	0.357932	0.529858	0.351173	Flt1/Jun	2
mmu04920	mmu04920	Adipocytokine signaling pathway	1/56	71/8979	0.35978	0.529858	0.351173	Socs3	1
mmu05034	mmu05034	Alcoholism	2/56	205/8979	0.366981	0.530812	0.351806	Bdnf/Fosb	2
mmu05205	mmu05205	Proteoglycans in cancer	2/56	205/8979	0.366981	0.530812	0.351806	Cdkn1a/Tlr2	2
mmu05412	mmu05412	Arrhythmogenic right ventricular cardiomyopathy	1/56	77/8979	0.383559	0.547017	0.362546	Lmna	1
mmu04621	mmu04621	NOD-like receptor signaling pathway	2/56	213/8979	0.384938	0.547017	0.362546	Jun/Cxcl1	2
mmu01524	mmu01524	Platinum drug resistance	1/56	80/8979	0.395121	0.556605	0.3689	Cdkn1a	1
mmu05208	mmu05208	Chemical carcinogenesis - reactive oxygen species	2/56	222/8979	0.404887	0.565445	0.374759	Jun/Fos	2
mmu05207	mmu05207	Chemical carcinogenesis - receptor activation	2/56	225/8979	0.411472	0.56973	0.377599	Jun/Fos	2
mmu04540	mmu04540	Gap junction	1/56	86/8979	0.417609	0.573328	0.379983	Tubb6	1
mmu04727	mmu04727	GABAergic synapse	1/56	89/8979	0.428543	0.57858	0.383464	Slc38a5	1
mmu04612	mmu04612	Antigen processing and presentation	1/56	90/8979	0.432143	0.57858	0.383464	Hspa1a	1
mmu05032	mmu05032	Morphine addiction	1/56	91/8979	0.43572	0.57858	0.383464	Pde4d	1
mmu05410	mmu05410	Hypertrophic cardiomyopathy	1/56	91/8979	0.43572	0.57858	0.383464	Lmna	1
mmu04610	mmu04610	Complement and coagulation cascades	1/56	93/8979	0.442809	0.583096	0.386457	Thbd	1
mmu05414	mmu05414	Dilated cardiomyopathy	1/56	94/8979	0.44632	0.583096	0.386457	Lmna	1
mmu05215	mmu05215	Prostate cancer	1/56	99/8979	0.463554	0.600766	0.398169	Cdkn1a	1
mmu05012	mmu05012	Parkinson disease	2/56	264/8979	0.493645	0.634686	0.42065	Dusp1/Tubb6	2
mmu04931	mmu04931	Insulin resistance	1/56	110/8979	0.499635	0.63733	0.422402	Socs3	1
mmu04725	mmu04725	Cholinergic synapse	1/56	112/8979	0.505935	0.640323	0.424386	Fos	1
mmu04670	mmu04670	Leukocyte transendothelial migration	1/56	118/8979	0.524368	0.658509	0.436439	Cxcl12	1
mmu04919	mmu04919	Thyroid hormone signaling pathway	1/56	120/8979	0.530361	0.659538	0.437121	Rcan1	1
mmu04650	mmu04650	Natural killer cell mediated cytotoxicity	1/56	121/8979	0.53333	0.659538	0.437121	Prf1	1
mmu04726	mmu04726	Serotonergic synapse	1/56	131/8979	0.562022	0.67266	0.445818	Dusp1	1
mmu05016	mmu05016	Huntington disease	2/56	302/8979	0.56665	0.67266	0.445818	Bdnf/Tubb6	2
mmu05206	mmu05206	MicroRNAs in cancer	2/56	303/8979	0.56847	0.67266	0.445818	Rassf1/Cdkn1a	2
mmu05022	mmu05022	Pathways of neurodegeneration - multiple diseases	3/56	471/8979	0.569102	0.67266	0.445818	Bdnf/Tubb6/Il1a	3
mmu00230	mmu00230	Purine metabolism	1/56	134/8979	0.570286	0.67266	0.445818	Pde4d	1
mmu03040	mmu03040	Spliceosome	1/56	134/8979	0.570286	0.67266	0.445818	Hspa1a	1
mmu04728	mmu04728	Dopaminergic synapse	1/56	135/8979	0.573007	0.67266	0.445818	Fos	1
mmu04910	mmu04910	Insulin signaling pathway	1/56	139/8979	0.583721	0.680308	0.450886	Socs3	1
mmu04140	mmu04140	Autophagy - animal	1/56	142/8979	0.591583	0.684546	0.453695	Uvrag	1
mmu04120	mmu04120	Ubiquitin mediated proteolysis	1/56	147/8979	0.604364	0.69033	0.457529	Socs3	1
mmu05322	mmu05322	Systemic lupus erythematosus	1/56	148/8979	0.606872	0.69033	0.457529	Cd86	1
mmu04072	mmu04072	Phospholipase D signaling pathway	1/56	149/8979	0.609365	0.69033	0.457529	Avp	1
mmu01240	mmu01240	Biosynthesis of cofactors	1/56	152/8979	0.616751	0.693845	0.459858	Gch1	1
mmu04390	mmu04390	Hippo signaling pathway	1/56	157/8979	0.628758	0.702474	0.465577	Rassf1	1
mmu04934	mmu04934	Cushing syndrome	1/56	162/8979	0.640394	0.710575	0.470946	Cdkn1a	1
mmu04530	mmu04530	Tight junction	1/56	167/8979	0.651673	0.715257	0.474049	Jun	1
mmu04310	mmu04310	Wnt signaling pathway	1/56	169/8979	0.656086	0.715257	0.474049	Jun	1
mmu04022	mmu04022	cGMP-PKG signaling pathway	1/56	173/8979	0.664749	0.715257	0.474049	Mef2a	1
mmu05165	mmu05165	Human papillomavirus infection	2/56	362/8979	0.666295	0.715257	0.474049	Oasl2/Cdkn1a	2
mmu04514	mmu04514	Cell adhesion molecules	1/56	174/8979	0.666881	0.715257	0.474049	Cd86	1
mmu04217	mmu04217	Necroptosis	1/56	176/8979	0.671105	0.715257	0.474049	Il1a	1
mmu04360	mmu04360	Axon guidance	1/56	181/8979	0.681436	0.721521	0.478201	Cxcl12	1
mmu05010	mmu05010	Alzheimer disease	2/56	383/8979	0.696644	0.732442	0.485439	Tubb6/Il1a	2
mmu04080	mmu04080	Neuroactive ligand-receptor interaction	2/56	386/8979	0.700793	0.732442	0.485439	Pmch/Avp	2
mmu04613	mmu04613	Neutrophil extracellular trap formation	1/56	207/8979	0.730231	0.758317	0.502588	Tlr2	1
mmu04015	mmu04015	Rap1 signaling pathway	1/56	214/8979	0.742062	0.765695	0.507478	Flt1	1
mmu04810	mmu04810	Regulation of actin cytoskeleton	1/56	220/8979	0.751796	0.770829	0.510881	Cxcl12	1
mmu04020	mmu04020	Calcium signaling pathway	1/56	240/8979	0.781709	0.796458	0.527867	Flt1	1
mmu05168	mmu05168	Herpes simplex virus 1 infection	2/56	459/8979	0.788249	0.798102	0.528956	Tlr2/Socs3	2
mmu04144	mmu04144	Endocytosis	1/56	272/8979	0.822362	0.82747	0.548421	Hspa1a	1
mmu05014	mmu05014	Amyotrophic lateral sclerosis	1/56	369/8979	0.905332	0.905332	0.600025	Tubb6	1
