# Supplementary material for: Sevoflurane postconditioning ameliorates cerebral ischemia-reperfusion injury in rats via TLR4/MyD88/TRAF6 signaling pathway
Source: Aging (Albany NY). 2022 Dec 29;14(24):10153–70. doi: 10.18632/aging.204461 (PMC9831726; doi:10.18632/aging.204461)
Supplement: Supplementary Table 2 [file aging-14-204461-s003.xlsx]

## Sheet: Supplemental Table 2
Supplementary Table 2. GO enrichment analyses results of DEGs.
ID	Gene.symbol	logFC	AveExpr	t	adj.P.Val	P.Value	B	updown
ILMN_2955329	Pmch	-2.50048	-1.08687	-4.48432	0.0610409	8.31394e-05	1.36694	DOWN
ILMN_2710928	Avp	-1.87195	-0.67116	-3.38301	0.280361	0.00185738	-1.25982	DOWN
ILMN_2762944	Ifi27l2a	-1.21998	-0.526437	-2.84215	0.502149	0.00761693	-2.4404	DOWN
ILMN_2833163	Fam180a	-1.10354	-0.643975	-5.87598	0.00429786	1.37578e-06	4.80392	DOWN
ILMN_2658908	Cxcl12	-0.934486	-0.617517	-6.053	0.00349708	8.16535e-07	5.23483	DOWN
ILMN_2819380	Erich5	-0.881051	-0.366521	-2.54032	0.635732	0.01595	-3.04925	DOWN
ILMN_2671473	C1ql2	-0.875109	-0.180477	-2.41052	0.694933	0.0216446	-3.29778	DOWN
ILMN_2954868	Oasl2	-0.869556	-0.0956933	-2.64633	0.578722	0.0123586	-2.84012	DOWN
ILMN_1218913	Igf2bp3	-0.869464	-0.340756	-6.43218	0.00313091	2.68522e-07	6.14727	DOWN
ILMN_1227926	Flt1	-0.820801	-0.407501	-4.12766	0.111129	0.00023292	0.495181	DOWN
ILMN_2811263	Zxda	-0.814159	-0.342923	-3.13959	0.361889	0.00354889	-1.80362	DOWN
ILMN_1255416	Ly6a	-0.768743	-0.0867712	-2.95723	0.443099	0.00569027	-2.198	DOWN
ILMN_2881810	Gm7609	-0.746841	-0.446202	-4.01468	0.128648	0.000321541	0.22219	DOWN
ILMN_2891245	Rhbdl2	-0.727832	-0.348527	-2.60505	0.603892	0.0136575	-2.92219	DOWN
ILMN_2960700	Prf1	-0.713244	-0.358272	-2.87065	0.494975	0.00708975	-2.38087	DOWN
ILMN_1258526	Lgals3bp	-0.696255	-0.358916	-2.43376	0.690599	0.0205054	-3.25392	DOWN
ILMN_1254927	Ly6c1	-0.661386	-0.202	-3.10281	0.381752	0.00390711	-1.88411	DOWN
ILMN_3160970	Gpr17	-0.659505	-0.342591	-2.89464	0.481647	0.00667263	-2.3305	DOWN
ILMN_2662450	Runx1t1	-0.652666	-0.251767	-4.17925	0.105357	0.000200899	0.620397	DOWN
ILMN_1229530	Csk	-0.634045	-0.343682	-5.14142	0.0140981	1.20698e-05	2.99325	DOWN
ILMN_3162005	Tmem204	-0.629515	-0.366024	-4.54392	0.0544186	6.98842e-05	1.51375	DOWN
ILMN_1216136	Cbfa2t3	-0.619161	-0.373547	-4.02631	0.128648	0.000311075	0.250208	DOWN
ILMN_2649773	Slc38a5	-0.618685	-0.460487	-2.67693	0.56183	0.0114705	-2.77877	DOWN
ILMN_1242613	Bahcc1	-0.609604	-0.342162	-5.33765	0.0101617	6.75671e-06	3.47938	DOWN
ILMN_2952779	Cxx1a	-0.607707	-0.264079	-3.00243	0.420405	0.00506753	-2.10138	DOWN
ILMN_1251160	Mef2a	-0.599934	-0.296854	-3.93849	0.141327	0.000399128	0.0391947	DOWN
ILMN_2762397	Fbxo25	-0.598711	-0.177458	-3.58941	0.222492	0.0010582	-0.785381	DOWN
ILMN_2661422	Ramp2	-0.596196	-0.112809	-4.23756	0.0949035	0.000169886	0.762342	DOWN
ILMN_1224883	Slc30a1	0.58824	0.26754	3.51337	0.252544	0.00130364	-0.961446	UP
ILMN_3162205	Ipcef1	0.590734	0.126548	5.26493	0.0108641	8.37801e-06	3.29935	UP
ILMN_2813487	Per1	0.593723	0.197306	3.16879	0.352279	0.00328701	-1.73939	UP
ILMN_3104462	Coq10b	0.599959	0.176864	3.32848	0.297647	0.00215072	-1.38321	UP
ILMN_2780424	Zfp36l1	0.610822	0.41758	3.0702	0.390342	0.00425325	-1.9551	UP
ILMN_1219154	Mt2	0.616405	0.619902	2.04039	0.855754	0.0493569	-3.95634	UP
ILMN_1240323	Dnajb1	0.617624	0.12019	2.40689	0.694933	0.0218281	-3.30462	UP
ILMN_2646625	Jun	0.627106	0.307242	2.35023	0.720086	0.024874	-3.41027	UP
ILMN_2735961	Tlr13	0.629356	0.521509	2.41257	0.694933	0.0215419	-3.29393	UP
ILMN_2720836	Rbm47	0.63693	0.258158	2.83787	0.502149	0.00769922	-2.44931	UP
ILMN_2925711	Dusp6	0.663669	0.0487825	3.36622	0.285362	0.00194335	-1.29791	UP
ILMN_1236700	Pde4d	0.665255	0.209747	4.90942	0.0233177	2.39299e-05	2.41791	UP
ILMN_1254405	Lmna	0.665822	0.486137	2.80075	0.514911	0.0084488	-2.52629	UP
ILMN_2516899	Uvrag	0.672195	0.244851	3.79934	0.166443	0.000590593	-0.292412	UP
ILMN_2714031	Errfi1	0.673074	0.0169054	3.08737	0.384208	0.00406757	-1.91778	UP
ILMN_2756435	Cebpb	0.679062	0.540606	2.33932	0.723345	0.025503	-3.43042	UP
ILMN_1236574	Cenpa	0.696679	0.344304	2.19657	0.789149	0.0351627	-3.68801	UP
ILMN_1226195	Bag3	0.706871	0.363305	2.55645	0.624846	0.0153476	-3.01777	UP
ILMN_1216597	Slc25a25	0.710855	0.199944	5.33318	0.0101617	6.84671e-06	3.46831	UP
ILMN_1256219	Sat1	0.732854	0.315589	4.14817	0.110664	0.000219632	0.544918	UP
ILMN_2919411	Osm	0.735036	0.501555	2.72711	0.531039	0.0101415	-2.67725	UP
ILMN_2991255	Gpr84	0.738925	1.12088	2.24021	0.764872	0.0319097	-3.61048	UP
ILMN_2622983	Dusp1	0.741712	0.201937	3.06012	0.393688	0.00436598	-1.97697	UP
ILMN_2647435	Rassf1	0.745313	0.352707	3.70024	0.196197	0.000778772	-0.526324	UP
ILMN_2680903	Iffo2	0.746631	0.143594	5.89066	0.00429786	1.31745e-06	4.83977	UP
ILMN_2606295	Gch1	0.747399	0.415866	2.44835	0.685426	0.0198183	-3.22623	UP
ILMN_2854943	Gprc5a	0.751803	0.202638	5.8455	0.00429786	1.50526e-06	4.72946	UP
ILMN_2865016	Cd83	0.766966	0.193841	3.31099	0.30009	0.00225386	-1.42261	UP
ILMN_1249767	Thbd	0.835307	0.618033	2.66878	0.566397	0.0117012	-2.79516	UP
ILMN_2662926	Egr1	0.84378	0.238008	3.40914	0.276253	0.00173082	-1.20038	UP
ILMN_2846776	Cdkn1a	0.887931	0.728317	2.84811	0.502149	0.00750384	-2.42799	UP
ILMN_3112219	Mlf1	0.897	0.213668	4.28934	0.0835561	0.000146321	0.888733	UP
ILMN_2661299	Pmp22	0.897519	0.283059	4.64347	0.0447544	5.22486e-05	1.75943	UP
ILMN_1217041	Cd86	0.90311	0.368273	5.60835	0.00779522	3.03351e-06	4.14763	UP
ILMN_2733733	Tlr2	0.917641	0.834651	2.96575	0.437532	0.00556769	-2.17986	UP
ILMN_1216764	Ier3	0.929744	0.552691	3.32757	0.297647	0.00215594	-1.38525	UP
ILMN_2595732	Nfil3	0.930598	0.275566	3.51238	0.252544	0.00130719	-0.963744	UP
ILMN_2882078	Phf13	0.954721	0.207525	6.32674	0.00313091	3.65518e-07	5.89514	UP
ILMN_3105563	Dmkn	0.956435	0.393529	3.87641	0.152769	0.000475603	-0.109182	UP
ILMN_3105417	Bdnf	0.966873	0.213348	3.11809	0.373932	0.00375431	-1.85073	UP
ILMN_2636403	Csrnp1	0.972782	0.530703	2.94763	0.450008	0.00583152	-2.21842	UP
ILMN_2761082	Adamts1	0.982553	0.552184	3.83717	0.162477	0.000531117	-0.202606	UP
ILMN_2729162	Sertad1	1.01418	0.575445	4.59383	0.0500762	6.04102e-05	1.63685	UP
ILMN_2722938	Ppp1r15a	1.01471	0.506953	4.19438	0.104224	0.000192351	0.657208	UP
ILMN_2732604	Tmcc3	1.03622	0.257709	6.13257	0.00332078	6.46142e-07	5.42757	UP
ILMN_2987709	Slc15a3	1.07944	0.867482	3.20931	0.343395	0.00295387	-1.64978	UP
ILMN_2718217	Tubb6	1.10103	1.23557	2.08179	0.84011	0.0451722	-3.88664	UP
ILMN_2710253	Cyr61	1.1136	0.518894	4.4456	0.0646241	9.30495e-05	1.27172	UP
ILMN_2755008	Nfkbiz	1.15065	0.652148	3.66231	0.196759	0.00086523	-0.615306	UP
ILMN_2835117	Ccl7	1.22019	1.16606	2.15498	0.810995	0.0385346	-3.76087	UP
ILMN_1227018	Il1a	1.24832	0.67508	3.84012	0.162477	0.000526739	-0.195603	UP
ILMN_1215713	Egr4	1.25231	0.171935	2.9098	0.472453	0.00642097	-2.29854	UP
ILMN_2744890	Gadd45g	1.25576	0.479966	3.05918	0.393688	0.00437655	-1.97899	UP
ILMN_1220034	Junb	1.27786	0.511714	4.10066	0.115465	0.000251625	0.429781	UP
ILMN_2620406	Nptx2	1.29996	0.469999	4.11628	0.11243	0.000240637	0.467586	UP
ILMN_2712075	Lcn2	1.31224	1.66023	2.15031	0.813349	0.0389313	-3.769	UP
ILMN_1259180	Rcan1	1.4479	0.835687	3.50915	0.252544	0.00131878	-0.97119	UP
ILMN_2900653	Gadd45b	1.44931	0.874191	3.67501	0.196759	0.00083529	-0.585544	UP
ILMN_2623983	Egr2	1.45946	0.467801	3.67425	0.196759	0.000837055	-0.587329	UP
ILMN_2624622	Akap12	1.51959	0.594322	4.41555	0.0659244	0.000101536	1.1979	UP
ILMN_3162407	Zfp36	1.59543	0.970834	3.46017	0.269461	0.00150711	-1.08376	UP
ILMN_2642913	Emp1	1.68866	1.20987	3.00612	0.418795	0.00501961	-2.09346	UP
ILMN_2742075	Cd14	1.75728	1.48188	2.88208	0.484928	0.00688791	-2.35689	UP
ILMN_2763245	Cxcl1	1.80664	1.77446	2.53134	0.640482	0.0162946	-3.06671	UP
ILMN_2999627	Gjb2	1.99957	1.31372	5.39999	0.0101617	5.61872e-06	3.63358	UP
ILMN_2618176	Socs3	2.00977	1.69223	3.53542	0.242606	0.00122733	-0.910554	UP
ILMN_2619408	Atf3	2.02696	1.26077	3.68453	0.196759	0.000813497	-0.5632	UP
ILMN_2750515	Fos	2.13143	0.790909	3.72297	0.191692	0.000731053	-0.472863	UP
ILMN_2778279	Fosb	2.28717	0.608835	6.35824	0.00313091	3.33329e-07	5.97058	UP
ILMN_2769918	Timp1	2.37619	2.36327	4.29232	0.0835561	0.000145069	0.896011	UP
ILMN_1212702	Hba-a1	2.43602	2.31054	2.70421	0.542027	0.0107293	-2.72373	UP
ILMN_1251414	Npas4	2.67696	0.847337	5.32004	0.0101617	7.11798e-06	3.4358	UP
ILMN_2829594	Hspa1a	3.05479	1.34405	4.52391	0.0559928	7.40848e-05	1.46442	UP
ILMN_1253919	Ccl3	3.25924	1.96371	4.90142	0.0233177	2.45e-05	2.39808	UP
ILMN_1223257	Ccl4	4.42995	2.98035	5.25344	0.0108641	8.66763e-06	3.27088	UP
