# Supplementary material for: Sevoflurane postconditioning ameliorates cerebral ischemia-reperfusion injury in rats via TLR4/MyD88/TRAF6 signaling pathway
Source: Aging (Albany NY). 2022 Dec 29;14(24):10153–70. doi: 10.18632/aging.204461 (PMC9831726; doi:10.18632/aging.204461)
Supplement: Supplementary Table 3 [file aging-14-204461-s004.xlsx]

## Sheet: Supplemental Table 3
Supplementary Table 3. KEGG enrichment analyses results of DEGs.
	ONTOLOGY	ID	Description	GeneRatio	BgRatio	pvalue	p.adjust	qvalue	geneID	Count
GO:0070371	BP	GO:0070371	ERK1 and ERK2 cascade	14/96	325/23328	6.72297e-11	1.04019e-07	7.68285e-08	Avp/Csk/Zfp36l1/Jun/Dusp6/Errfi1/Dusp1/Tlr2/Ccl7/Il1a/Akap12/Atf3/Ccl3/Ccl4	14
GO:0042326	BP	GO:0042326	negative regulation of phosphorylation	16/96	471/23328	8.91717e-11	1.04019e-07	7.68285e-08	Csk/Cbfa2t3/Per1/Jun/Dusp6/Pde4d/Errfi1/Dusp1/Gprc5a/Cdkn1a/Ier3/Ppp1r15a/Gadd45g/Gadd45b/Socs3/Atf3	16
GO:0043618	BP	GO:0043618	regulation of transcription from RNA polymerase II promoter in response to stress	7/96	46/23328	7.51352e-10	5.84301e-07	4.31566e-07	Dnajb1/Jun/Cebpb/Bag3/Egr1/Ppp1r15a/Atf3	7
GO:0043620	BP	GO:0043620	regulation of DNA-templated transcription in response to stress	7/96	51/23328	1.59825e-09	9.32182e-07	6.88511e-07	Dnajb1/Jun/Cebpb/Bag3/Egr1/Ppp1r15a/Atf3	7
GO:0001933	BP	GO:0001933	negative regulation of protein phosphorylation	14/96	425/23328	2.20755e-09	1.03004e-06	7.60792e-07	Csk/Per1/Jun/Dusp6/Pde4d/Errfi1/Dusp1/Gprc5a/Cdkn1a/Ppp1r15a/Gadd45g/Gadd45b/Socs3/Atf3	14
GO:0070372	BP	GO:0070372	regulation of ERK1 and ERK2 cascade	12/96	308/23328	5.26378e-09	2.04673e-06	1.51172e-06	Csk/Jun/Dusp6/Errfi1/Dusp1/Tlr2/Ccl7/Il1a/Akap12/Atf3/Ccl3/Ccl4	12
GO:0038066	BP	GO:0038066	p38MAPK cascade	6/96	48/23328	4.42541e-08	1.47492e-05	1.08938e-05	Per1/Zfp36l1/Dusp1/Gadd45g/Gadd45b/Zfp36	6
GO:0002548	BP	GO:0002548	monocyte chemotaxis	6/96	57/23328	1.27025e-07	3.70438e-05	2.73606e-05	Cxcl12/Flt1/Dusp1/Ccl7/Ccl3/Ccl4	6
GO:0097201	BP	GO:0097201	negative regulation of transcription from RNA polymerase II promoter in response to stress	4/96	13/23328	1.87139e-07	4.85106e-05	3.583e-05	Dnajb1/Jun/Bag3/Ppp1r15a	4
GO:0097529	BP	GO:0097529	myeloid leukocyte migration	9/96	219/23328	3.0716e-07	7.16603e-05	5.29284e-05	Cxcl12/Flt1/Pde4d/Dusp1/Ccl7/Il1a/Cxcl1/Ccl3/Ccl4	9
GO:1903708	BP	GO:1903708	positive regulation of hemopoiesis	9/96	224/23328	3.71473e-07	7.3265e-05	5.41136e-05	Flt1/Zfp36l1/Jun/Cd83/Nfkbiz/Il1a/Cxcl1/Fos/Ccl3	9
GO:0050727	BP	GO:0050727	regulation of inflammatory response	11/96	372/23328	3.84395e-07	7.3265e-05	5.41136e-05	Gpr17/Per1/Cebpb/Osm/Pmp22/Tlr2/Ier3/Nfkbiz/Zfp36/Socs3/Ccl3	11
GO:1990868	BP	GO:1990868	response to chemokine	6/96	70/23328	4.39653e-07	7.3265e-05	5.41136e-05	Cxcl12/Dusp1/Ccl7/Cxcl1/Ccl3/Ccl4	6
GO:1990869	BP	GO:1990869	cellular response to chemokine	6/96	70/23328	4.39653e-07	7.3265e-05	5.41136e-05	Cxcl12/Dusp1/Ccl7/Cxcl1/Ccl3/Ccl4	6
GO:0071347	BP	GO:0071347	cellular response to interleukin-1	6/96	81/23328	1.04938e-06	0.000163213	0.000120549	Cebpb/Egr1/Ccl7/Il1a/Ccl3/Ccl4	6
GO:0051348	BP	GO:0051348	negative regulation of transferase activity	9/96	260/23328	1.28748e-06	0.00018773	0.000138658	Csk/Dusp6/Errfi1/Dusp1/Gprc5a/Cdkn1a/Gadd45g/Gadd45b/Zfp36	9
GO:1903706	BP	GO:1903706	regulation of hemopoiesis	11/96	424/23328	1.38631e-06	0.000190251	0.00014052	Flt1/Zfp36l1/Jun/Cebpb/Cd83/Nfkbiz/Il1a/Zfp36/Cxcl1/Fos/Ccl3	11
GO:0071674	BP	GO:0071674	mononuclear cell migration	6/96	89/23328	1.82995e-06	0.000237181	0.000175182	Cxcl12/Flt1/Dusp1/Ccl7/Ccl3/Ccl4	6
GO:0050900	BP	GO:0050900	leukocyte migration	10/96	360/23328	2.35124e-06	0.000288708	0.00021324	Cxcl12/Flt1/Pde4d/Dusp1/Tlr2/Ccl7/Il1a/Cxcl1/Ccl3/Ccl4	10
GO:0070555	BP	GO:0070555	response to interleukin-1	6/96	96/23328	2.8526e-06	0.000332756	0.000245774	Cebpb/Egr1/Ccl7/Il1a/Ccl3/Ccl4	6
GO:0030595	BP	GO:0030595	leukocyte chemotaxis	8/96	219/23328	3.46512e-06	0.000367872	0.000271711	Cxcl12/Flt1/Pde4d/Dusp1/Ccl7/Cxcl1/Ccl3/Ccl4	8
GO:0002573	BP	GO:0002573	myeloid leukocyte differentiation	8/96	220/23328	3.58383e-06	0.000367872	0.000271711	Cbfa2t3/Zfp36l1/Jun/Cebpb/Tlr2/Junb/Fos/Ccl3	8
GO:0071219	BP	GO:0071219	cellular response to molecule of bacterial origin	9/96	295/23328	3.62669e-06	0.000367872	0.000271711	Pde4d/Cebpb/Gch1/Cd86/Tlr2/Il1a/Zfp36/Cd14/Cxcl1	9
GO:0009266	BP	GO:0009266	response to temperature stimulus	7/96	159/23328	4.29141e-06	0.000417161	0.000308115	Pmch/Cxcl12/Bag3/Osm/Pmp22/Il1a/Hspa1a	7
GO:0033673	BP	GO:0033673	negative regulation of kinase activity	8/96	227/23328	4.51562e-06	0.000421398	0.000311245	Csk/Dusp6/Errfi1/Dusp1/Gprc5a/Cdkn1a/Gadd45g/Gadd45b	8
GO:0070098	BP	GO:0070098	chemokine-mediated signaling pathway	5/96	60/23328	4.85105e-06	0.000435288	0.000321505	Cxcl12/Ccl7/Cxcl1/Ccl3/Ccl4	5
GO:0071216	BP	GO:0071216	cellular response to biotic stimulus	9/96	320/23328	7.00077e-06	0.000604919	0.000446794	Pde4d/Cebpb/Gch1/Cd86/Tlr2/Il1a/Zfp36/Cd14/Cxcl1	9
GO:0030099	BP	GO:0030099	myeloid cell differentiation	10/96	414/23328	8.06264e-06	0.000671791	0.000496186	Cbfa2t3/Zfp36l1/Jun/Cebpb/Tlr2/Junb/Zfp36/Fos/Hba-a1/Ccl3	10
GO:1902107	BP	GO:1902107	positive regulation of leukocyte differentiation	7/96	180/23328	9.68682e-06	0.000779288	0.000575583	Zfp36l1/Jun/Cd83/Nfkbiz/Il1a/Fos/Ccl3	7
GO:1990266	BP	GO:1990266	neutrophil migration	6/96	124/23328	1.25274e-05	0.000937063	0.000692116	Pde4d/Ccl7/Il1a/Cxcl1/Ccl3/Ccl4	6
GO:0046686	BP	GO:0046686	response to cadmium ion	4/96	35/23328	1.27855e-05	0.000937063	0.000692116	Slc30a1/Mt2/Jun/Fos	4
GO:0034612	BP	GO:0034612	response to tumor necrosis factor	7/96	188/23328	1.2853e-05	0.000937063	0.000692116	Zfp36l1/Gch1/Ccl7/Zfp36/Cd14/Ccl3/Ccl4	7
GO:0071277	BP	GO:0071277	cellular response to calcium ion	5/96	77/23328	1.66076e-05	0.00115091	0.000850066	Mef2a/Jun/Junb/Fos/Fosb	5
GO:0031098	BP	GO:0031098	stress-activated protein kinase signaling cascade	8/96	272/23328	1.68483e-05	0.00115091	0.000850066	Per1/Zfp36l1/Errfi1/Dusp1/Il1a/Gadd45g/Gadd45b/Zfp36	8
GO:0070373	BP	GO:0070373	negative regulation of ERK1 and ERK2 cascade	5/96	78/23328	1.76876e-05	0.00115091	0.000850066	Csk/Dusp6/Errfi1/Dusp1/Atf3	5
GO:0010038	BP	GO:0010038	response to metal ion	8/96	274/23328	1.77595e-05	0.00115091	0.000850066	Mef2a/Slc30a1/Mt2/Jun/Il1a/Junb/Fos/Fosb	8
GO:0071222	BP	GO:0071222	cellular response to lipopolysaccharide	8/96	285/23328	2.35456e-05	0.00145158	0.00107214	Pde4d/Cebpb/Gch1/Cd86/Il1a/Zfp36/Cd14/Cxcl1	8
GO:0006469	BP	GO:0006469	negative regulation of protein kinase activity	7/96	207/23328	2.3919e-05	0.00145158	0.00107214	Dusp6/Errfi1/Dusp1/Gprc5a/Cdkn1a/Gadd45g/Gadd45b	7
GO:1900744	BP	GO:1900744	regulation of p38MAPK cascade	4/96	41/23328	2.42656e-05	0.00145158	0.00107214	Per1/Dusp1/Gadd45g/Gadd45b	4
GO:0070374	BP	GO:0070374	positive regulation of ERK1 and ERK2 cascade	7/96	216/23328	3.14036e-05	0.00180813	0.00133549	Jun/Tlr2/Ccl7/Il1a/Akap12/Ccl3/Ccl4	7
GO:0034620	BP	GO:0034620	cellular response to unfolded protein	5/96	88/23328	3.17759e-05	0.00180813	0.00133549	Bag3/Pmp22/Ppp1r15a/Atf3/Hspa1a	5
GO:0002237	BP	GO:0002237	response to molecule of bacterial origin	9/96	389/23328	3.28345e-05	0.00182388	0.00134712	Pde4d/Cebpb/Gch1/Cd86/Tlr2/Il1a/Zfp36/Cd14/Cxcl1	9
GO:0048511	BP	GO:0048511	rhythmic process	8/96	301/23328	3.47293e-05	0.00188427	0.00139172	Pmch/Prf1/Per1/Egr1/Nfil3/Bdnf/Adamts1/Egr2	8
GO:0060326	BP	GO:0060326	cell chemotaxis	8/96	303/23328	3.63969e-05	0.00192986	0.0014254	Cxcl12/Flt1/Pde4d/Dusp1/Ccl7/Cxcl1/Ccl3/Ccl4	8
GO:1902105	BP	GO:1902105	regulation of leukocyte differentiation	8/96	309/23328	4.18071e-05	0.00216746	0.00160089	Zfp36l1/Jun/Cebpb/Cd83/Nfkbiz/Il1a/Fos/Ccl3	8
GO:0009408	BP	GO:0009408	response to heat	5/96	94/23328	4.36656e-05	0.00219552	0.00162161	Bag3/Osm/Pmp22/Il1a/Hspa1a	5
GO:0097530	BP	GO:0097530	granulocyte migration	6/96	155/23328	4.42304e-05	0.00219552	0.00162161	Pde4d/Ccl7/Il1a/Cxcl1/Ccl3/Ccl4	6
GO:0071248	BP	GO:0071248	cellular response to metal ion	6/96	156/23328	4.58482e-05	0.00222841	0.00164591	Mef2a/Mt2/Jun/Junb/Fos/Fosb	6
GO:0030593	BP	GO:0030593	neutrophil chemotaxis	5/96	99/23328	5.59823e-05	0.00266545	0.0019687	Pde4d/Ccl7/Cxcl1/Ccl3/Ccl4	5
GO:0048247	BP	GO:0048247	lymphocyte chemotaxis	4/96	53/23328	6.75641e-05	0.00315254	0.00232847	Cxcl12/Ccl7/Ccl3/Ccl4	4
GO:0010823	BP	GO:0010823	negative regulation of mitochondrion organization	4/96	54/23328	7.27401e-05	0.0033275	0.0024577	Avp/Lmna/Bag3/Ier3	4
GO:0043409	BP	GO:0043409	negative regulation of MAPK cascade	6/96	173/23328	8.14192e-05	0.00365291	0.00269804	Csk/Per1/Dusp6/Errfi1/Dusp1/Atf3	6
GO:0071900	BP	GO:0071900	regulation of protein serine/threonine kinase activity	9/96	442/23328	8.77101e-05	0.0038609	0.00285167	Flt1/Csk/Dusp6/Uvrag/Dusp1/Cdkn1a/Pmp22/Gadd45g/Gadd45b	9
GO:0035967	BP	GO:0035967	cellular response to topologically incorrect protein	5/96	110/23328	9.24465e-05	0.00397962	0.00293935	Bag3/Pmp22/Ppp1r15a/Atf3/Hspa1a	5
GO:0051403	BP	GO:0051403	stress-activated MAPK cascade	7/96	257/23328	9.39527e-05	0.00397962	0.00293935	Per1/Zfp36l1/Dusp1/Il1a/Gadd45g/Gadd45b/Zfp36	7
GO:0014706	BP	GO:0014706	striated muscle tissue development	9/96	447/23328	9.55245e-05	0.00397962	0.00293935	Mef2a/Lmna/Egr1/Pmp22/Bdnf/Rcan1/Egr2/Atf3/Fos	9
GO:0001819	BP	GO:0001819	positive regulation of cytokine production	9/96	449/23328	9.881e-05	0.00404428	0.00298711	Cebpb/Osm/Cd83/Egr1/Tlr2/Il1a/Cd14/Ccl3/Ccl4	9
GO:0071276	BP	GO:0071276	cellular response to cadmium ion	3/96	23/23328	0.000112666	0.00453189	0.00334727	Mt2/Jun/Fos	3
GO:0009636	BP	GO:0009636	response to toxic substance	5/96	116/23328	0.000118819	0.00469837	0.00347022	Slc30a1/Mt2/Gch1/Lcn2/Ccl4	5
GO:0006986	BP	GO:0006986	response to unfolded protein	5/96	117/23328	0.000123722	0.00481073	0.00355321	Bag3/Pmp22/Ppp1r15a/Atf3/Hspa1a	5
GO:0032760	BP	GO:0032760	positive regulation of tumor necrosis factor production	4/96	63/23328	0.000133186	0.00506466	0.00374076	Tlr2/Cd14/Ccl3/Ccl4	4
GO:0032680	BP	GO:0032680	regulation of tumor necrosis factor production	5/96	120/23328	0.000139368	0.00506466	0.00374076	Tlr2/Zfp36/Cd14/Ccl3/Ccl4	5
GO:0060537	BP	GO:0060537	muscle tissue development	9/96	470/23328	0.000139435	0.00506466	0.00374076	Mef2a/Lmna/Egr1/Pmp22/Bdnf/Rcan1/Egr2/Atf3/Fos	9
GO:0032496	BP	GO:0032496	response to lipopolysaccharide	8/96	368/23328	0.000140904	0.00506466	0.00374076	Pde4d/Cebpb/Gch1/Cd86/Il1a/Zfp36/Cd14/Cxcl1	8
GO:1903557	BP	GO:1903557	positive regulation of tumor necrosis factor superfamily cytokine production	4/96	64/23328	0.000141619	0.00506466	0.00374076	Tlr2/Cd14/Ccl3/Ccl4	4
GO:0019221	BP	GO:0019221	cytokine-mediated signaling pathway	8/96	369/23328	0.000143545	0.00506466	0.00374076	Cxcl12/Osm/Egr1/Ccl7/Il1a/Cxcl1/Ccl3/Ccl4	8
GO:0032897	BP	GO:0032897	negative regulation of viral transcription	3/96	25/23328	0.000145449	0.00506466	0.00374076	Jun/Zfp36/Ccl4	3
GO:1903555	BP	GO:1903555	regulation of tumor necrosis factor superfamily cytokine production	5/96	122/23328	0.00015061	0.00516727	0.00381655	Tlr2/Zfp36/Cd14/Ccl3/Ccl4	5
GO:0007519	BP	GO:0007519	skeletal muscle tissue development	6/96	196/23328	0.000161294	0.00545359	0.00402803	Egr1/Pmp22/Rcan1/Egr2/Atf3/Fos	6
GO:0032640	BP	GO:0032640	tumor necrosis factor production	5/96	126/23328	0.000175166	0.00575581	0.00425125	Tlr2/Zfp36/Cd14/Ccl3/Ccl4	5
GO:0071621	BP	GO:0071621	granulocyte chemotaxis	5/96	126/23328	0.000175166	0.00575581	0.00425125	Pde4d/Ccl7/Cxcl1/Ccl3/Ccl4	5
GO:0002763	BP	GO:0002763	positive regulation of myeloid leukocyte differentiation	4/96	68/23328	0.000179252	0.00580826	0.00428999	Zfp36l1/Jun/Fos/Ccl3	4
GO:0051592	BP	GO:0051592	response to calcium ion	5/96	128/23328	0.000188535	0.00594394	0.0043902	Mef2a/Jun/Junb/Fos/Fosb	5
GO:0071706	BP	GO:0071706	tumor necrosis factor superfamily cytokine production	5/96	128/23328	0.000188535	0.00594394	0.0043902	Tlr2/Zfp36/Cd14/Ccl3/Ccl4	5
GO:0002761	BP	GO:0002761	regulation of myeloid leukocyte differentiation	5/96	131/23328	0.000210031	0.00648251	0.004788	Zfp36l1/Jun/Cebpb/Fos/Ccl3	5
GO:0060538	BP	GO:0060538	skeletal muscle organ development	6/96	206/23328	0.000211175	0.00648251	0.004788	Egr1/Pmp22/Rcan1/Egr2/Atf3/Fos	6
GO:0007611	BP	GO:0007611	learning or memory	7/96	299/23328	0.00023849	0.00722595	0.0053371	Jun/Egr1/Tlr2/Bdnf/Nptx2/Rcan1/Npas4	7
GO:0042692	BP	GO:0042692	muscle cell differentiation	8/96	399/23328	0.000244033	0.00729908	0.00539112	Cxcl12/Tmem204/Mef2a/Ramp2/Lmna/Pmp22/Bdnf/Rcan1	8
GO:0007422	BP	GO:0007422	peripheral nervous system development	4/96	74/23328	0.000248535	0.00733964	0.00542107	Osm/Pmp22/Bdnf/Egr2	4
GO:0034341	BP	GO:0034341	response to interferon-gamma	5/96	137/23328	0.00025858	0.00754084	0.00556968	Gch1/Tlr2/Ccl7/Ccl3/Ccl4	5
GO:0007623	BP	GO:0007623	circadian rhythm	6/96	217/23328	0.000279333	0.00804548	0.00594241	Pmch/Prf1/Per1/Egr1/Nfil3/Bdnf	6
GO:0035966	BP	GO:0035966	response to topologically incorrect protein	5/96	141/23328	0.00029539	0.00840421	0.00620737	Bag3/Pmp22/Ppp1r15a/Atf3/Hspa1a	5
GO:2001233	BP	GO:2001233	regulation of apoptotic signaling pathway	8/96	413/23328	0.000307583	0.00864567	0.00638571	Avp/Cxcl12/Lmna/Osm/Pmp22/Ier3/Bdnf/Atf3	8
GO:0045637	BP	GO:0045637	regulation of myeloid cell differentiation	6/96	224/23328	0.00033099	0.00903424	0.0066727	Zfp36l1/Jun/Cebpb/Zfp36/Fos/Ccl3	6
GO:0032103	BP	GO:0032103	positive regulation of response to external stimulus	8/96	418/23328	0.000333321	0.00903424	0.0066727	Cxcl12/Cebpb/Osm/Tlr2/Nfkbiz/Cxcl1/Ccl3/Ccl4	8
GO:0032651	BP	GO:0032651	regulation of interleukin-1 beta production	4/96	80/23328	0.00033525	0.00903424	0.0066727	Errfi1/Egr1/Tlr2/Ccl3	4
GO:0045616	BP	GO:0045616	regulation of keratinocyte differentiation	3/96	33/23328	0.000336896	0.00903424	0.0066727	Zfp36l1/Errfi1/Zfp36	3
GO:0007517	BP	GO:0007517	muscle organ development	8/96	420/23328	0.000344096	0.00912246	0.00673787	Lmna/Egr1/Pmp22/Bdnf/Rcan1/Egr2/Atf3/Fos	8
GO:0071241	BP	GO:0071241	cellular response to inorganic substance	6/96	227/23328	0.000355297	0.00931358	0.00687902	Mef2a/Mt2/Jun/Junb/Fos/Fosb	6
GO:0031099	BP	GO:0031099	regeneration	5/96	150/23328	0.000392668	0.0101788	0.00751809	Cxcl12/Jun/Cebpb/Cdkn1a/Bdnf	5
GO:0050729	BP	GO:0050729	positive regulation of inflammatory response	5/96	152/23328	0.000417227	0.0106966	0.00790052	Cebpb/Osm/Tlr2/Nfkbiz/Ccl3	5
GO:0030856	BP	GO:0030856	regulation of epithelial cell differentiation	5/96	156/23328	0.000469807	0.0119137	0.00879947	Zfp36l1/Errfi1/Cebpb/Il1a/Zfp36	5
GO:0050890	BP	GO:0050890	cognition	7/96	336/23328	0.000481022	0.0119641	0.00883669	Jun/Egr1/Tlr2/Bdnf/Nptx2/Rcan1/Npas4	7
GO:0035914	BP	GO:0035914	skeletal muscle cell differentiation	4/96	88/23328	0.00048205	0.0119641	0.00883669	Egr1/Egr2/Atf3/Fos	4
GO:0071383	BP	GO:0071383	cellular response to steroid hormone stimulus	5/96	159/23328	0.000512407	0.0125836	0.00929429	Per1/Zfp36l1/Bdnf/Zfp36/Npas4	5
GO:0032611	BP	GO:0032611	interleukin-1 beta production	4/96	91/23328	0.000547327	0.0133012	0.00982429	Errfi1/Egr1/Tlr2/Ccl3	4
GO:0050715	BP	GO:0050715	positive regulation of cytokine secretion	3/96	39/23328	0.000554318	0.0133322	0.00984719	Tlr2/Il1a/Cd14	3
GO:0033135	BP	GO:0033135	regulation of peptidyl-serine phosphorylation	5/96	164/23328	0.000589785	0.0140405	0.0103703	Avp/Pde4d/Osm/Bdnf/Ppp1r15a	5
GO:0071356	BP	GO:0071356	cellular response to tumor necrosis factor	5/96	169/23328	0.000675625	0.0159216	0.0117597	Zfp36l1/Ccl7/Zfp36/Ccl3/Ccl4	5
GO:0032652	BP	GO:0032652	regulation of interleukin-1 production	4/96	98/23328	0.000723707	0.0164349	0.0121388	Errfi1/Egr1/Tlr2/Ccl3	4
GO:0000185	BP	GO:0000185	activation of MAPKKK activity	2/96	10/23328	0.000738133	0.0164349	0.0121388	Gadd45g/Gadd45b	2
GO:0010612	BP	GO:0010612	regulation of cardiac muscle adaptation	2/96	10/23328	0.000738133	0.0164349	0.0121388	Lmna/Errfi1	2
GO:0070391	BP	GO:0070391	response to lipoteichoic acid	2/96	10/23328	0.000738133	0.0164349	0.0121388	Tlr2/Cd14	2
GO:0071223	BP	GO:0071223	cellular response to lipoteichoic acid	2/96	10/23328	0.000738133	0.0164349	0.0121388	Tlr2/Cd14	2
GO:0046782	BP	GO:0046782	regulation of viral transcription	3/96	43/23328	0.000739676	0.0164349	0.0121388	Jun/Zfp36/Ccl4	3
GO:0007612	BP	GO:0007612	learning	5/96	175/23328	0.00079061	0.0169397	0.0125117	Jun/Tlr2/Bdnf/Nptx2/Npas4	5
GO:0043114	BP	GO:0043114	regulation of vascular permeability	3/96	44/23328	0.00079144	0.0169397	0.0125117	Ramp2/Akap12/Ccl4	3
GO:0071385	BP	GO:0071385	cellular response to glucocorticoid stimulus	3/96	44/23328	0.00079144	0.0169397	0.0125117	Zfp36l1/Zfp36/Npas4	3
GO:1902895	BP	GO:1902895	positive regulation of pri-miRNA transcription by RNA polymerase II	3/96	44/23328	0.00079144	0.0169397	0.0125117	Jun/Egr1/Fos	3
GO:0072676	BP	GO:0072676	lymphocyte migration	4/96	103/23328	0.000872033	0.0180275	0.0133152	Cxcl12/Ccl7/Ccl3/Ccl4	4
GO:0045647	BP	GO:0045647	negative regulation of erythrocyte differentiation	2/96	11/23328	0.000899744	0.0180275	0.0133152	Zfp36l1/Zfp36	2
GO:0055015	BP	GO:0055015	ventricular cardiac muscle cell development	2/96	11/23328	0.000899744	0.0180275	0.0133152	Mef2a/Lmna	2
GO:1990440	BP	GO:1990440	positive regulation of transcription from RNA polymerase II promoter in response to endoplasmic reticulum stress	2/96	11/23328	0.000899744	0.0180275	0.0133152	Cebpb/Atf3	2
GO:2000322	BP	GO:2000322	regulation of glucocorticoid receptor signaling pathway	2/96	11/23328	0.000899744	0.0180275	0.0133152	Per1/Bdnf	2
GO:0019083	BP	GO:0019083	viral transcription	3/96	46/23328	0.000901753	0.0180275	0.0133152	Jun/Zfp36/Ccl4	3
GO:0071384	BP	GO:0071384	cellular response to corticosteroid stimulus	3/96	46/23328	0.000901753	0.0180275	0.0133152	Zfp36l1/Zfp36/Npas4	3
GO:0048525	BP	GO:0048525	negative regulation of viral process	4/96	104/23328	0.000904081	0.0180275	0.0133152	Oasl2/Jun/Zfp36/Ccl4	4
GO:0001659	BP	GO:0001659	temperature homeostasis	5/96	181/23328	0.00091962	0.018182	0.0134292	Cebpb/Egr1/Il1a/Gadd45g/Lcn2	5
GO:0035710	BP	GO:0035710	CD4-positive, alpha-beta T cell activation	4/96	106/23328	0.000970653	0.0190297	0.0140554	Cebpb/Cd83/Nfkbiz/Gadd45g	4
GO:0031349	BP	GO:0031349	positive regulation of defense response	6/96	278/23328	0.00102651	0.0198994	0.0146977	Cebpb/Osm/Tlr2/Nfkbiz/Cxcl1/Ccl3	6
GO:0002224	BP	GO:0002224	toll-like receptor signaling pathway	4/96	108/23328	0.0010406	0.0198994	0.0146977	Tlr13/Cd86/Tlr2/Cd14	4
GO:0045639	BP	GO:0045639	positive regulation of myeloid cell differentiation	4/96	108/23328	0.0010406	0.0198994	0.0146977	Zfp36l1/Jun/Fos/Ccl3	4
GO:0014745	BP	GO:0014745	negative regulation of muscle adaptation	2/96	12/23328	0.0010768	0.0200974	0.014844	Lmna/Errfi1	2
GO:0043922	BP	GO:0043922	negative regulation by host of viral transcription	2/96	12/23328	0.0010768	0.0200974	0.014844	Jun/Ccl4	2
GO:0097709	BP	GO:0097709	connective tissue replacement	2/96	12/23328	0.0010768	0.0200974	0.014844	Il1a/Timp1	2
GO:0030217	BP	GO:0030217	T cell differentiation	6/96	282/23328	0.00110467	0.0204539	0.0151073	Zfp36l1/Cd83/Egr1/Nfkbiz/Il1a/Gadd45g	6
GO:0032612	BP	GO:0032612	interleukin-1 production	4/96	110/23328	0.00111402	0.0204646	0.0151152	Errfi1/Egr1/Tlr2/Ccl3	4
GO:0008637	BP	GO:0008637	apoptotic mitochondrial changes	4/96	111/23328	0.00115206	0.0208353	0.015389	Avp/Jun/Lmna/Ier3	4
GO:0030316	BP	GO:0030316	osteoclast differentiation	4/96	111/23328	0.00115206	0.0208353	0.015389	Cebpb/Junb/Fos/Ccl3	4
GO:0009615	BP	GO:0009615	response to virus	6/96	286/23328	0.00118732	0.0213079	0.015738	Ifi27l2a/Oasl2/Prf1/Tlr13/Cd86/Lcn2	6
GO:0098754	BP	GO:0098754	detoxification	3/96	51/23328	0.00121884	0.0217066	0.0160325	Slc30a1/Mt2/Gch1	3
GO:0031953	BP	GO:0031953	negative regulation of protein autophosphorylation	2/96	13/23328	0.00126917	0.021814	0.0161119	Jun/Errfi1	2
GO:0032060	BP	GO:0032060	bleb assembly	2/96	13/23328	0.00126917	0.021814	0.0161119	Pmp22/Emp1	2
GO:0034350	BP	GO:0034350	regulation of glial cell apoptotic process	2/96	13/23328	0.00126917	0.021814	0.0161119	Pmp22/Akap12	2
GO:0001892	BP	GO:0001892	embryonic placenta development	4/96	114/23328	0.00127163	0.021814	0.0161119	Zfp36l1/Cebpb/Junb/Socs3	4
GO:0071346	BP	GO:0071346	cellular response to interferon-gamma	4/96	114/23328	0.00127163	0.021814	0.0161119	Tlr2/Ccl7/Ccl3/Ccl4	4
GO:0032731	BP	GO:0032731	positive regulation of interleukin-1 beta production	3/96	52/23328	0.00128963	0.0219613	0.0162207	Egr1/Tlr2/Ccl3	3
GO:0030216	BP	GO:0030216	keratinocyte differentiation	4/96	115/23328	0.00131334	0.0221568	0.0163651	Zfp36l1/Errfi1/Il1a/Zfp36	4
GO:0072593	BP	GO:0072593	reactive oxygen species metabolic process	6/96	292/23328	0.0013201	0.0221568	0.0163651	Gch1/Cdkn1a/Tlr2/Ier3/Cxcl1/Hba-a1	6
GO:0034605	BP	GO:0034605	cellular response to heat	3/96	53/23328	0.00136295	0.0227126	0.0167756	Bag3/Pmp22/Il1a	3
GO:1904705	BP	GO:1904705	regulation of vascular associated smooth muscle cell proliferation	3/96	54/23328	0.00143885	0.0236397	0.0174603	Jun/Cdkn1a/Adamts1	3
GO:1990874	BP	GO:1990874	vascular associated smooth muscle cell proliferation	3/96	54/23328	0.00143885	0.0236397	0.0174603	Jun/Cdkn1a/Adamts1	3
GO:0007175	BP	GO:0007175	negative regulation of epidermal growth factor-activated receptor activity	2/96	14/23328	0.00147674	0.0237602	0.0175493	Errfi1/Gprc5a	2
GO:0008298	BP	GO:0008298	intracellular mRNA localization	2/96	14/23328	0.00147674	0.0237602	0.0175493	Zfp36l1/Zfp36	2
GO:0042921	BP	GO:0042921	glucocorticoid receptor signaling pathway	2/96	14/23328	0.00147674	0.0237602	0.0175493	Per1/Bdnf	2
GO:0045604	BP	GO:0045604	regulation of epidermal cell differentiation	3/96	55/23328	0.00151735	0.0242464	0.0179084	Zfp36l1/Errfi1/Zfp36	3
GO:0043405	BP	GO:0043405	regulation of MAP kinase activity	6/96	301/23328	0.00154023	0.0244446	0.0180548	Flt1/Csk/Dusp6/Dusp1/Gadd45g/Gadd45b	6
GO:0055001	BP	GO:0055001	muscle cell development	5/96	205/23328	0.00159698	0.0248617	0.0183629	Mef2a/Ramp2/Lmna/Pmp22/Rcan1	5
GO:0050732	BP	GO:0050732	negative regulation of peptidyl-tyrosine phosphorylation	3/96	56/23328	0.00159848	0.0248617	0.0183629	Errfi1/Gprc5a/Socs3	3
GO:1902893	BP	GO:1902893	regulation of pri-miRNA transcription by RNA polymerase II	3/96	56/23328	0.00159848	0.0248617	0.0183629	Jun/Egr1/Fos	3
GO:2000377	BP	GO:2000377	regulation of reactive oxygen species metabolic process	5/96	207/23328	0.00166647	0.0255782	0.0188921	Gch1/Cdkn1a/Tlr2/Ier3/Cxcl1	5
GO:0007614	BP	GO:0007614	short-term memory	2/96	15/23328	0.00169937	0.0255782	0.0188921	Rcan1/Npas4	2
GO:0031958	BP	GO:0031958	corticosteroid receptor signaling pathway	2/96	15/23328	0.00169937	0.0255782	0.0188921	Per1/Bdnf	2
GO:0051712	BP	GO:0051712	positive regulation of killing of cells of other organism	2/96	15/23328	0.00169937	0.0255782	0.0188921	Prf1/Cxcl1	2
GO:0090594	BP	GO:0090594	inflammatory response to wounding	2/96	15/23328	0.00169937	0.0255782	0.0188921	Il1a/Timp1	2
GO:0008217	BP	GO:0008217	regulation of blood pressure	5/96	209/23328	0.00173816	0.0259534	0.0191692	Pmch/Avp/Ramp2/Gch1/Ier3	5
GO:1903037	BP	GO:1903037	regulation of leukocyte cell-cell adhesion	6/96	309/23328	0.00175846	0.0259534	0.0191692	Cxcl12/Cebpb/Cd83/Cd86/Nfkbiz/Il1a	6
GO:0032663	BP	GO:0032663	regulation of interleukin-2 production	3/96	58/23328	0.00176879	0.0259534	0.0191692	Cd83/Il1a/Zfp36	3
GO:0061614	BP	GO:0061614	pri-miRNA transcription by RNA polymerase II	3/96	58/23328	0.00176879	0.0259534	0.0191692	Jun/Egr1/Fos	3
GO:1901216	BP	GO:1901216	positive regulation of neuron death	4/96	126/23328	0.00183725	0.0267894	0.0197867	Jun/Egr1/Fos/Ccl3	4
GO:0001836	BP	GO:0001836	release of cytochrome c from mitochondria	3/96	59/23328	0.00185803	0.0269241	0.0198862	Avp/Jun/Lmna	3
GO:0014902	BP	GO:0014902	myotube differentiation	4/96	127/23328	0.00189108	0.027234	0.020115	Cxcl12/Pmp22/Bdnf/Rcan1	4
GO:0045655	BP	GO:0045655	regulation of monocyte differentiation	2/96	16/23328	0.00193694	0.0273871	0.0202282	Zfp36l1/Jun	2
GO:0045820	BP	GO:0045820	negative regulation of glycolytic process	2/96	16/23328	0.00193694	0.0273871	0.0202282	Cbfa2t3/Ier3	2
GO:0051709	BP	GO:0051709	regulation of killing of cells of other organism	2/96	16/23328	0.00193694	0.0273871	0.0202282	Prf1/Cxcl1	2
GO:0060711	BP	GO:0060711	labyrinthine layer development	3/96	60/23328	0.00195003	0.0274061	0.0202422	Zfp36l1/Junb/Socs3	3
GO:0051146	BP	GO:0051146	striated muscle cell differentiation	6/96	317/23328	0.00199943	0.0278019	0.0205345	Cxcl12/Mef2a/Lmna/Pmp22/Bdnf/Rcan1	6
GO:0033138	BP	GO:0033138	positive regulation of peptidyl-serine phosphorylation	4/96	129/23328	0.00200202	0.0278019	0.0205345	Avp/Osm/Bdnf/Ppp1r15a	4
GO:0032732	BP	GO:0032732	positive regulation of interleukin-1 production	3/96	61/23328	0.00204482	0.0279377	0.0206348	Egr1/Tlr2/Ccl3	3
GO:0045776	BP	GO:0045776	negative regulation of blood pressure	3/96	61/23328	0.00204482	0.0279377	0.0206348	Pmch/Gch1/Ier3	3
GO:0002685	BP	GO:0002685	regulation of leukocyte migration	5/96	217/23328	0.00204772	0.0279377	0.0206348	Cxcl12/Dusp1/Tlr2/Il1a/Ccl4	5
GO:0043903	BP	GO:0043903	regulation of symbiotic process	5/96	218/23328	0.00208907	0.0281723	0.0208081	Oasl2/Jun/Zfp36/Cxcl1/Ccl4	5
GO:0048545	BP	GO:0048545	response to steroid hormone	5/96	218/23328	0.00208907	0.0281723	0.0208081	Per1/Zfp36l1/Bdnf/Zfp36/Npas4	5
GO:0050863	BP	GO:0050863	regulation of T cell activation	6/96	321/23328	0.00212891	0.0283993	0.0209758	Csk/Cebpb/Cd83/Cd86/Nfkbiz/Il1a	6
GO:0019080	BP	GO:0019080	viral gene expression	3/96	62/23328	0.00214243	0.0283993	0.0209758	Jun/Zfp36/Ccl4	3
GO:0031640	BP	GO:0031640	killing of cells of other organism	3/96	62/23328	0.00214243	0.0283993	0.0209758	Cxcl12/Prf1/Cxcl1	3
GO:0034349	BP	GO:0034349	glial cell apoptotic process	2/96	17/23328	0.00218932	0.0285346	0.0210757	Pmp22/Akap12	2
GO:0055012	BP	GO:0055012	ventricular cardiac muscle cell differentiation	2/96	17/23328	0.00218932	0.0285346	0.0210757	Mef2a/Lmna	2
GO:0070262	BP	GO:0070262	peptidyl-serine dephosphorylation	2/96	17/23328	0.00218932	0.0285346	0.0210757	Dusp1/Ppp1r15a	2
GO:0010948	BP	GO:0010948	negative regulation of cell cycle process	5/96	221/23328	0.00221678	0.0286997	0.0211977	Zfp36l1/Osm/Rassf1/Cdkn1a/Ier3	5
GO:0050673	BP	GO:0050673	epithelial cell proliferation	7/96	438/23328	0.0022266	0.0286997	0.0211977	Cxcl12/Flt1/Zfp36l1/Jun/Errfi1/Cebpb/Zfp36	7
GO:0045860	BP	GO:0045860	positive regulation of protein kinase activity	7/96	440/23328	0.00228409	0.029279	0.0216255	Flt1/Csk/Egr1/Cdkn1a/Cd86/Gadd45g/Gadd45b	7
GO:0007622	BP	GO:0007622	rhythmic behavior	3/96	64/23328	0.00234623	0.0296366	0.0218896	Pmch/Egr1/Egr2	3
GO:0050707	BP	GO:0050707	regulation of cytokine secretion	3/96	64/23328	0.00234623	0.0296366	0.0218896	Tlr2/Il1a/Cd14	3
GO:0003018	BP	GO:0003018	vascular process in circulatory system	5/96	224/23328	0.00235009	0.0296366	0.0218896	Avp/Ramp2/Gch1/Akap12/Ccl4	5
GO:0007204	BP	GO:0007204	positive regulation of cytosolic calcium ion concentration	6/96	330/23328	0.00244337	0.0303216	0.0223956	Pmch/Avp/Gpr17/Pde4d/Cxcl1/Ccl3	6
GO:0000188	BP	GO:0000188	inactivation of MAPK activity	2/96	18/23328	0.0024564	0.0303216	0.0223956	Dusp6/Dusp1	2
GO:0061158	BP	GO:0061158	3'-UTR-mediated mRNA destabilization	2/96	18/23328	0.0024564	0.0303216	0.0223956	Zfp36l1/Zfp36	2
GO:1900153	BP	GO:1900153	positive regulation of nuclear-transcribed mRNA catabolic process, deadenylation-dependent decay	2/96	18/23328	0.0024564	0.0303216	0.0223956	Zfp36l1/Zfp36	2
GO:0007050	BP	GO:0007050	cell cycle arrest	4/96	137/23328	0.00249091	0.0305858	0.0225907	Rassf1/Cdkn1a/Mlf1/Pmp22	4
GO:0032623	BP	GO:0032623	interleukin-2 production	3/96	66/23328	0.00256166	0.0312898	0.0231107	Cd83/Il1a/Zfp36	3
GO:0043270	BP	GO:0043270	positive regulation of ion transport	6/96	334/23328	0.00259386	0.031518	0.0232793	Avp/Cxcl12/Cebpb/Il1a/Cxcl1/Ccl4	6
GO:0045786	BP	GO:0045786	negative regulation of cell cycle	7/96	451/23328	0.0026211	0.0316841	0.0234019	Zfp36l1/Osm/Rassf1/Cdkn1a/Mlf1/Pmp22/Ier3	7
GO:2000242	BP	GO:2000242	negative regulation of reproductive process	3/96	67/23328	0.00267381	0.0317805	0.0234731	Osm/Il1a/Timp1	3
GO:2001234	BP	GO:2001234	negative regulation of apoptotic signaling pathway	5/96	231/23328	0.00268376	0.0317805	0.0234731	Avp/Cxcl12/Lmna/Ier3/Bdnf	5
GO:0032872	BP	GO:0032872	regulation of stress-activated MAPK cascade	5/96	232/23328	0.00273409	0.0317805	0.0234731	Per1/Dusp1/Il1a/Gadd45g/Gadd45b	5
GO:0010623	BP	GO:0010623	programmed cell death involved in cell development	2/96	19/23328	0.00273805	0.0317805	0.0234731	Bdnf/Il1a	2
GO:0035994	BP	GO:0035994	response to muscle stretch	2/96	19/23328	0.00273805	0.0317805	0.0234731	Jun/Fos	2
GO:0043116	BP	GO:0043116	negative regulation of vascular permeability	2/96	19/23328	0.00273805	0.0317805	0.0234731	Ramp2/Akap12	2
GO:0060712	BP	GO:0060712	spongiotrophoblast layer development	2/96	19/23328	0.00273805	0.0317805	0.0234731	Zfp36l1/Socs3	2
GO:0090201	BP	GO:0090201	negative regulation of release of cytochrome c from mitochondria	2/96	19/23328	0.00273805	0.0317805	0.0234731	Avp/Lmna	2
GO:0097191	BP	GO:0097191	extrinsic apoptotic signaling pathway	5/96	233/23328	0.00278509	0.0321665	0.0237582	Lmna/Bag3/Il1a/Lcn2/Atf3	5
GO:0010821	BP	GO:0010821	regulation of mitochondrion organization	4/96	142/23328	0.00283494	0.0325809	0.0240643	Avp/Lmna/Bag3/Ier3	4
GO:0070302	BP	GO:0070302	regulation of stress-activated protein kinase signaling cascade	5/96	235/23328	0.00288918	0.0329235	0.0243173	Per1/Dusp1/Il1a/Gadd45g/Gadd45b	5
GO:0045600	BP	GO:0045600	positive regulation of fat cell differentiation	3/96	69/23328	0.00290709	0.0329235	0.0243173	Zfp36l1/Cebpb/Zfp36	3
GO:0048168	BP	GO:0048168	regulation of neuronal synaptic plasticity	3/96	69/23328	0.00290709	0.0329235	0.0243173	Pmch/Egr1/Bdnf	3
GO:0002683	BP	GO:0002683	negative regulation of immune system process	7/96	462/23328	0.00299521	0.0333377	0.0246233	Cxcl12/Gpr17/Zfp36l1/Cebpb/Dusp1/Cd86/Zfp36	7
GO:0009896	BP	GO:0009896	positive regulation of catabolic process	7/96	463/23328	0.00303115	0.0333377	0.0246233	Cbfa2t3/Zfp36l1/Bag3/Tlr2/Ier3/Zfp36/Hspa1a	7
GO:0002755	BP	GO:0002755	MyD88-dependent toll-like receptor signaling pathway	2/96	20/23328	0.00303415	0.0333377	0.0246233	Tlr13/Tlr2	2
GO:0035970	BP	GO:0035970	peptidyl-threonine dephosphorylation	2/96	20/23328	0.00303415	0.0333377	0.0246233	Dusp6/Dusp1	2
GO:0048245	BP	GO:0048245	eosinophil chemotaxis	2/96	20/23328	0.00303415	0.0333377	0.0246233	Ccl7/Ccl4	2
GO:1900151	BP	GO:1900151	regulation of nuclear-transcribed mRNA catabolic process, deadenylation-dependent decay	2/96	20/23328	0.00303415	0.0333377	0.0246233	Zfp36l1/Zfp36	2
GO:0007159	BP	GO:0007159	leukocyte cell-cell adhesion	6/96	345/23328	0.00304369	0.0333377	0.0246233	Cxcl12/Cebpb/Cd83/Cd86/Nfkbiz/Il1a	6
GO:0035637	BP	GO:0035637	multicellular organismal signaling	4/96	146/23328	0.00313258	0.0339922	0.0251067	Avp/Mef2a/Pde4d/Pmp22	4
GO:0045598	BP	GO:0045598	regulation of fat cell differentiation	4/96	146/23328	0.00313258	0.0339922	0.0251067	Runx1t1/Zfp36l1/Cebpb/Zfp36	4
GO:0010611	BP	GO:0010611	regulation of cardiac muscle hypertrophy	3/96	72/23328	0.00327987	0.0354257	0.0261655	Mef2a/Lmna/Errfi1	3
GO:0002221	BP	GO:0002221	pattern recognition receptor signaling pathway	4/96	149/23328	0.00336934	0.0360581	0.0266326	Tlr13/Cd86/Tlr2/Cd14	4
GO:0007613	BP	GO:0007613	memory	4/96	149/23328	0.00336934	0.0360581	0.0266326	Egr1/Bdnf/Rcan1/Npas4	4
GO:1903793	BP	GO:1903793	positive regulation of anion transport	3/96	73/23328	0.00341033	0.0363302	0.0268335	Avp/Cebpb/Il1a	3
GO:0034614	BP	GO:0034614	cellular response to reactive oxygen species	4/96	150/23328	0.00345089	0.0365952	0.0270292	Jun/Gch1/Lcn2/Fos	4
GO:0006874	BP	GO:0006874	cellular calcium ion homeostasis	7/96	476/23328	0.00352913	0.0372555	0.027517	Pmch/Avp/Gpr17/Slc30a1/Pde4d/Cxcl1/Ccl3	7
GO:1903522	BP	GO:1903522	regulation of blood circulation	5/96	248/23328	0.00363558	0.0379958	0.0280638	Pmch/Avp/Mef2a/Pde4d/Gch1	5
GO:0051770	BP	GO:0051770	positive regulation of nitric-oxide synthase biosynthetic process	2/96	22/23328	0.0036692	0.0379958	0.0280638	Tlr2/Akap12	2
GO:0060080	BP	GO:0060080	inhibitory postsynaptic potential	2/96	22/23328	0.0036692	0.0379958	0.0280638	Bdnf/Npas4	2
GO:1900543	BP	GO:1900543	negative regulation of purine nucleotide metabolic process	2/96	22/23328	0.0036692	0.0379958	0.0280638	Cbfa2t3/Ier3	2
GO:0014743	BP	GO:0014743	regulation of muscle hypertrophy	3/96	75/23328	0.00368069	0.0379958	0.0280638	Mef2a/Lmna/Errfi1	3
GO:0034976	BP	GO:0034976	response to endoplasmic reticulum stress	5/96	249/23328	0.00369821	0.0380085	0.0280731	Jun/Cebpb/Pmp22/Ppp1r15a/Atf3	5
GO:0045670	BP	GO:0045670	regulation of osteoclast differentiation	3/96	76/23328	0.00382063	0.0388068	0.0286628	Cebpb/Fos/Ccl3	3
GO:0050663	BP	GO:0050663	cytokine secretion	3/96	76/23328	0.00382063	0.0388068	0.0286628	Tlr2/Il1a/Cd14	3
GO:0007568	BP	GO:0007568	aging	5/96	251/23328	0.00382579	0.0388068	0.0286628	Ifi27l2a/Pde4d/Lmna/Cdkn1a/Pmp22	5
GO:0045444	BP	GO:0045444	fat cell differentiation	5/96	252/23328	0.00389075	0.0392877	0.029018	Runx1t1/Zfp36l1/Cebpb/Egr2/Zfp36	5
GO:1901224	BP	GO:1901224	positive regulation of NIK/NF-kappaB signaling	3/96	77/23328	0.00396378	0.0392877	0.029018	Cd86/Tlr2/Cd14	3
GO:0002687	BP	GO:0002687	positive regulation of leukocyte migration	4/96	156/23328	0.00396859	0.0392877	0.029018	Cxcl12/Tlr2/Il1a/Ccl4	4
GO:0032675	BP	GO:0032675	regulation of interleukin-6 production	4/96	156/23328	0.00396859	0.0392877	0.029018	Csk/Cebpb/Tlr2/Il1a	4
GO:0050728	BP	GO:0050728	negative regulation of inflammatory response	4/96	156/23328	0.00396859	0.0392877	0.029018	Gpr17/Ier3/Zfp36/Socs3	4
GO:0032288	BP	GO:0032288	myelin assembly	2/96	23/23328	0.00400792	0.0392877	0.029018	Pmp22/Tlr2	2
GO:0036003	BP	GO:0036003	positive regulation of transcription from RNA polymerase II promoter in response to stress	2/96	23/23328	0.00400792	0.0392877	0.029018	Cebpb/Atf3	2
GO:0045980	BP	GO:0045980	negative regulation of nucleotide metabolic process	2/96	23/23328	0.00400792	0.0392877	0.029018	Cbfa2t3/Ier3	2
GO:0045333	BP	GO:0045333	cellular respiration	4/96	157/23328	0.0040597	0.0396287	0.0292699	Cbfa2t3/Coq10b/Slc25a25/Bdnf	4
GO:0009611	BP	GO:0009611	response to wounding	7/96	492/23328	0.00422517	0.0410722	0.030336	Zfp36l1/Jun/Thbd/Cdkn1a/Il1a/Zfp36/Timp1	7
GO:0055074	BP	GO:0055074	calcium ion homeostasis	7/96	493/23328	0.00427189	0.0412619	0.0304761	Pmch/Avp/Gpr17/Slc30a1/Pde4d/Cxcl1/Ccl3	7
GO:0007626	BP	GO:0007626	locomotory behavior	5/96	258/23328	0.00429724	0.0412619	0.0304761	Avp/Cxcl12/Egr1/Pmp22/Rcan1	5
GO:0050765	BP	GO:0050765	negative regulation of phagocytosis	2/96	24/23328	0.00436061	0.0412619	0.0304761	Csk/Tlr2	2
GO:0070498	BP	GO:0070498	interleukin-1-mediated signaling pathway	2/96	24/23328	0.00436061	0.0412619	0.0304761	Egr1/Il1a	2
GO:0070841	BP	GO:0070841	inclusion body assembly	2/96	24/23328	0.00436061	0.0412619	0.0304761	Dnajb1/Pmp22	2
GO:0072677	BP	GO:0072677	eosinophil migration	2/96	24/23328	0.00436061	0.0412619	0.0304761	Ccl7/Ccl4	2
GO:0050678	BP	GO:0050678	regulation of epithelial cell proliferation	6/96	372/23328	0.00439392	0.0412619	0.0304761	Cxcl12/Flt1/Zfp36l1/Jun/Errfi1/Zfp36	6
GO:0038034	BP	GO:0038034	signal transduction in absence of ligand	3/96	80/23328	0.0044127	0.0412619	0.0304761	Bag3/Il1a/Lcn2	3
GO:0097192	BP	GO:0097192	extrinsic apoptotic signaling pathway in absence of ligand	3/96	80/23328	0.0044127	0.0412619	0.0304761	Bag3/Il1a/Lcn2	3
GO:0001818	BP	GO:0001818	negative regulation of cytokine production	5/96	260/23328	0.00443923	0.0412619	0.0304761	Csk/Errfi1/Cd83/Tlr2/Zfp36	5
GO:0042493	BP	GO:0042493	response to drug	5/96	260/23328	0.00443923	0.0412619	0.0304761	Jun/Bdnf/Lcn2/Fos/Ccl4	5
GO:0044403	BP	GO:0044403	symbiotic process	6/96	374/23328	0.00450906	0.0417446	0.0308326	Oasl2/Jun/Uvrag/Zfp36/Cxcl1/Ccl4	6
GO:0051480	BP	GO:0051480	regulation of cytosolic calcium ion concentration	6/96	375/23328	0.00456746	0.0418009	0.0308742	Pmch/Avp/Gpr17/Pde4d/Cxcl1/Ccl3	6
GO:0043525	BP	GO:0043525	positive regulation of neuron apoptotic process	3/96	81/23328	0.0045689	0.0418009	0.0308742	Jun/Egr1/Ccl3	3
GO:0045682	BP	GO:0045682	regulation of epidermis development	3/96	81/23328	0.0045689	0.0418009	0.0308742	Zfp36l1/Errfi1/Zfp36	3
GO:1901214	BP	GO:1901214	regulation of neuron death	6/96	377/23328	0.00468592	0.0425862	0.0314543	Jun/Cebpb/Egr1/Bdnf/Fos/Ccl3	6
GO:0007095	BP	GO:0007095	mitotic G2 DNA damage checkpoint	2/96	25/23328	0.00472714	0.0425862	0.0314543	Cdkn1a/Ier3	2
GO:0046688	BP	GO:0046688	response to copper ion	2/96	25/23328	0.00472714	0.0425862	0.0314543	Mt2/Il1a	2
GO:0050805	BP	GO:0050805	negative regulation of synaptic transmission	3/96	82/23328	0.00472841	0.0425862	0.0314543	Pmch/Slc30a1/Bdnf	3
GO:0009991	BP	GO:0009991	response to extracellular stimulus	6/96	378/23328	0.004746	0.0425862	0.0314543	Jun/Slc25a25/Cdkn1a/Zfp36/Atf3/Fos	6
GO:0048660	BP	GO:0048660	regulation of smooth muscle cell proliferation	4/96	165/23328	0.00484002	0.0432635	0.0319545	Jun/Egr1/Cdkn1a/Adamts1	4
GO:0046631	BP	GO:0046631	alpha-beta T cell activation	4/96	166/23328	0.00494414	0.0440255	0.0325173	Cebpb/Cd83/Nfkbiz/Gadd45g	4
GO:0032635	BP	GO:0032635	interleukin-6 production	4/96	167/23328	0.00504976	0.0445575	0.0329103	Csk/Cebpb/Tlr2/Il1a	4
GO:0051384	BP	GO:0051384	response to glucocorticoid	3/96	84/23328	0.00505745	0.0445575	0.0329103	Zfp36l1/Zfp36/Npas4	3
GO:0003299	BP	GO:0003299	muscle hypertrophy in response to stress	2/96	26/23328	0.00510741	0.0445575	0.0329103	Lmna/Errfi1	2
GO:0014898	BP	GO:0014898	cardiac muscle hypertrophy in response to stress	2/96	26/23328	0.00510741	0.0445575	0.0329103	Lmna/Errfi1	2
GO:0031100	BP	GO:0031100	animal organ regeneration	2/96	26/23328	0.00510741	0.0445575	0.0329103	Cxcl12/Cebpb	2
GO:0032102	BP	GO:0032102	negative regulation of response to external stimulus	6/96	384/23328	0.00511848	0.0445575	0.0329103	Gpr17/Dusp1/Thbd/Ier3/Zfp36/Socs3	6
GO:0043523	BP	GO:0043523	regulation of neuron apoptotic process	5/96	270/23328	0.00519982	0.0450973	0.033309	Jun/Cebpb/Egr1/Bdnf/Ccl3	5
GO:0043367	BP	GO:0043367	CD4-positive, alpha-beta T cell differentiation	3/96	85/23328	0.00522702	0.0451654	0.0333592	Cd83/Nfkbiz/Gadd45g	3
GO:0048659	BP	GO:0048659	smooth muscle cell proliferation	4/96	170/23328	0.00537568	0.0462785	0.0341813	Jun/Egr1/Cdkn1a/Adamts1	4
GO:0006882	BP	GO:0006882	cellular zinc ion homeostasis	2/96	27/23328	0.00550129	0.046334	0.0342224	Slc30a1/Mt2	2
GO:0014887	BP	GO:0014887	cardiac muscle adaptation	2/96	27/23328	0.00550129	0.046334	0.0342224	Lmna/Errfi1	2
GO:0042059	BP	GO:0042059	negative regulation of epidermal growth factor receptor signaling pathway	2/96	27/23328	0.00550129	0.046334	0.0342224	Errfi1/Gprc5a	2
GO:0051767	BP	GO:0051767	nitric-oxide synthase biosynthetic process	2/96	27/23328	0.00550129	0.046334	0.0342224	Tlr2/Akap12	2
GO:0051769	BP	GO:0051769	regulation of nitric-oxide synthase biosynthetic process	2/96	27/23328	0.00550129	0.046334	0.0342224	Tlr2/Akap12	2
GO:0060713	BP	GO:0060713	labyrinthine layer morphogenesis	2/96	27/23328	0.00550129	0.046334	0.0342224	Zfp36l1/Socs3	2
GO:0031960	BP	GO:0031960	response to corticosteroid	3/96	88/23328	0.00575616	0.0481133	0.0355365	Zfp36l1/Zfp36/Npas4	3
GO:0001890	BP	GO:0001890	placenta development	4/96	174/23328	0.00583175	0.0481133	0.0355365	Zfp36l1/Cebpb/Junb/Socs3	4
GO:0030224	BP	GO:0030224	monocyte differentiation	2/96	28/23328	0.00590868	0.0481133	0.0355365	Zfp36l1/Jun	2
GO:0055069	BP	GO:0055069	zinc ion homeostasis	2/96	28/23328	0.00590868	0.0481133	0.0355365	Slc30a1/Mt2	2
GO:0061099	BP	GO:0061099	negative regulation of protein tyrosine kinase activity	2/96	28/23328	0.00590868	0.0481133	0.0355365	Errfi1/Gprc5a	2
GO:0071480	BP	GO:0071480	cellular response to gamma radiation	2/96	28/23328	0.00590868	0.0481133	0.0355365	Egr1/Cdkn1a	2
GO:0090025	BP	GO:0090025	regulation of monocyte chemotaxis	2/96	28/23328	0.00590868	0.0481133	0.0355365	Cxcl12/Dusp1	2
GO:1900745	BP	GO:1900745	positive regulation of p38MAPK cascade	2/96	28/23328	0.00590868	0.0481133	0.0355365	Gadd45g/Gadd45b	2
GO:1903131	BP	GO:1903131	mononuclear cell differentiation	2/96	28/23328	0.00590868	0.0481133	0.0355365	Zfp36l1/Jun	2
GO:0031331	BP	GO:0031331	positive regulation of cellular catabolic process	6/96	396/23328	0.00592737	0.0481133	0.0355365	Cbfa2t3/Zfp36l1/Bag3/Tlr2/Zfp36/Hspa1a	6
GO:0051702	BP	GO:0051702	interaction with symbiont	3/96	89/23328	0.0059394	0.0481133	0.0355365	Jun/Cxcl1/Ccl4	3
GO:0071496	BP	GO:0071496	cellular response to external stimulus	5/96	280/23328	0.00604858	0.0488255	0.0360626	Jun/Bag3/Cdkn1a/Atf3/Fos	5
GO:0009612	BP	GO:0009612	response to mechanical stimulus	4/96	176/23328	0.00606917	0.0488255	0.0360626	Cxcl12/Jun/Bag3/Fos	4
GO:0042594	BP	GO:0042594	response to starvation	4/96	178/23328	0.00631295	0.0500562	0.0369716	Jun/Cdkn1a/Zfp36/Atf3	4
GO:0072091	BP	GO:0072091	regulation of stem cell proliferation	3/96	91/23328	0.00631629	0.0500562	0.0369716	Zfp36l1/Bdnf/Cxcl1	3
GO:0007176	BP	GO:0007176	regulation of epidermal growth factor-activated receptor activity	2/96	29/23328	0.00632944	0.0500562	0.0369716	Errfi1/Gprc5a	2
GO:1901185	BP	GO:1901185	negative regulation of ERBB signaling pathway	2/96	29/23328	0.00632944	0.0500562	0.0369716	Errfi1/Gprc5a	2
GO:2000272	BP	GO:2000272	negative regulation of signaling receptor activity	2/96	29/23328	0.00632944	0.0500562	0.0369716	Errfi1/Gprc5a	2
GO:0010863	BP	GO:0010863	positive regulation of phospholipase C activity	2/96	30/23328	0.00676348	0.0525973	0.0388485	Flt1/Cd86	2
GO:0043372	BP	GO:0043372	positive regulation of CD4-positive, alpha-beta T cell differentiation	2/96	30/23328	0.00676348	0.0525973	0.0388485	Cd83/Nfkbiz	2
GO:0051085	BP	GO:0051085	chaperone cofactor-dependent protein refolding	2/96	30/23328	0.00676348	0.0525973	0.0388485	Dnajb1/Hspa1a	2
GO:0071711	BP	GO:0071711	basement membrane organization	2/96	30/23328	0.00676348	0.0525973	0.0388485	Ramp2/Pmp22	2
GO:1903579	BP	GO:1903579	negative regulation of ATP metabolic process	2/96	30/23328	0.00676348	0.0525973	0.0388485	Cbfa2t3/Ier3	2
GO:0030098	BP	GO:0030098	lymphocyte differentiation	6/96	409/23328	0.00690517	0.0533646	0.0394152	Zfp36l1/Cd83/Egr1/Nfkbiz/Il1a/Gadd45g	6
GO:1904035	BP	GO:1904035	regulation of epithelial cell apoptotic process	3/96	94/23328	0.00690789	0.0533646	0.0394152	Ramp2/Zfp36l1/Zfp36	3
GO:0008016	BP	GO:0008016	regulation of heart contraction	4/96	183/23328	0.00695069	0.053518	0.0395285	Pmch/Mef2a/Pde4d/Gch1	4
GO:0095500	BP	GO:0095500	acetylcholine receptor signaling pathway	2/96	31/23328	0.00721067	0.0552063	0.0407754	Ly6a/Ly6c1	2
GO:0031644	BP	GO:0031644	regulation of nervous system process	4/96	185/23328	0.00721728	0.0552063	0.0407754	Avp/Il1a/Nptx2/Egr2	4
GO:0046328	BP	GO:0046328	regulation of JNK cascade	4/96	186/23328	0.00735307	0.0560612	0.0414069	Per1/Il1a/Gadd45g/Gadd45b	4
GO:0070997	BP	GO:0070997	neuron death	6/96	416/23328	0.00747776	0.0566796	0.0418636	Jun/Cebpb/Egr1/Bdnf/Fos/Ccl3	6
GO:0001570	BP	GO:0001570	vasculogenesis	3/96	97/23328	0.00753136	0.0566796	0.0418636	Ramp2/Zfp36l1/Junb	3
GO:0002027	BP	GO:0002027	regulation of heart rate	3/96	97/23328	0.00753136	0.0566796	0.0418636	Pmch/Pde4d/Gch1	3
GO:0120162	BP	GO:0120162	positive regulation of cold-induced thermogenesis	3/96	97/23328	0.00753136	0.0566796	0.0418636	Cebpb/Gadd45g/Lcn2	3
GO:0010614	BP	GO:0010614	negative regulation of cardiac muscle hypertrophy	2/96	32/23328	0.0076709	0.0569943	0.0420961	Lmna/Errfi1	2
GO:0032673	BP	GO:0032673	regulation of interleukin-4 production	2/96	32/23328	0.0076709	0.0569943	0.0420961	Cebpb/Cd83	2
GO:0032743	BP	GO:0032743	positive regulation of interleukin-2 production	2/96	32/23328	0.0076709	0.0569943	0.0420961	Cd83/Il1a	2
GO:0060669	BP	GO:0060669	embryonic placenta morphogenesis	2/96	32/23328	0.0076709	0.0569943	0.0420961	Zfp36l1/Socs3	2
GO:0051402	BP	GO:0051402	neuron apoptotic process	5/96	298/23328	0.00781491	0.0575522	0.0425081	Jun/Cebpb/Egr1/Bdnf/Ccl3	5
GO:0006816	BP	GO:0006816	calcium ion transport	6/96	420/23328	0.00781999	0.0575522	0.0425081	Cxcl12/Ramp2/Slc30a1/Pde4d/Slc25a25/Ccl4	6
GO:0010639	BP	GO:0010639	negative regulation of organelle organization	6/96	420/23328	0.00781999	0.0575522	0.0425081	Avp/Lmna/Bag3/Osm/Tlr2/Ier3	6
GO:0055002	BP	GO:0055002	striated muscle cell development	4/96	190/23328	0.00791311	0.0580544	0.0428791	Mef2a/Lmna/Pmp22/Rcan1	4
GO:0043502	BP	GO:0043502	regulation of muscle adaptation	3/96	99/23328	0.00796492	0.0582513	0.0430245	Mef2a/Lmna/Errfi1	3
GO:0000186	BP	GO:0000186	activation of MAPKK activity	2/96	33/23328	0.00814406	0.0582825	0.0430476	Gadd45g/Gadd45b	2
GO:0044818	BP	GO:0044818	mitotic G2/M transition checkpoint	2/96	33/23328	0.00814406	0.0582825	0.0430476	Cdkn1a/Ier3	2
GO:0045672	BP	GO:0045672	positive regulation of osteoclast differentiation	2/96	33/23328	0.00814406	0.0582825	0.0430476	Fos/Ccl3	2
GO:0050999	BP	GO:0050999	regulation of nitric-oxide synthase activity	2/96	33/23328	0.00814406	0.0582825	0.0430476	Gch1/Il1a	2
GO:0061157	BP	GO:0061157	mRNA destabilization	2/96	33/23328	0.00814406	0.0582825	0.0430476	Zfp36l1/Zfp36	2
GO:1905144	BP	GO:1905144	response to acetylcholine	2/96	33/23328	0.00814406	0.0582825	0.0430476	Ly6a/Ly6c1	2
GO:1905145	BP	GO:1905145	cellular response to acetylcholine	2/96	33/23328	0.00814406	0.0582825	0.0430476	Ly6a/Ly6c1	2
GO:0045619	BP	GO:0045619	regulation of lymphocyte differentiation	4/96	192/23328	0.00820337	0.0585274	0.0432284	Zfp36l1/Cd83/Nfkbiz/Il1a	4
GO:0009913	BP	GO:0009913	epidermal cell differentiation	4/96	193/23328	0.00835108	0.0592424	0.0437565	Zfp36l1/Errfi1/Il1a/Zfp36	4
GO:0034329	BP	GO:0034329	cell junction assembly	6/96	426/23328	0.00835437	0.0592424	0.0437565	Ramp2/Pmp22/Tlr2/Bdnf/Gjb2/Npas4	6
GO:0033555	BP	GO:0033555	multicellular organismal response to stress	3/96	101/23328	0.00841293	0.0593504	0.0438363	Osm/Gch1/Bdnf	3
GO:0010959	BP	GO:0010959	regulation of metal ion transport	6/96	427/23328	0.00844592	0.0593504	0.0438363	Cxcl12/Slc30a1/Per1/Pde4d/Cxcl1/Ccl4	6
GO:0022407	BP	GO:0022407	regulation of cell-cell adhesion	6/96	427/23328	0.00844592	0.0593504	0.0438363	Cxcl12/Cebpb/Cd83/Cd86/Nfkbiz/Il1a	6
GO:0014741	BP	GO:0014741	negative regulation of muscle hypertrophy	2/96	34/23328	0.00863004	0.060008	0.044322	Lmna/Errfi1	2
GO:1900274	BP	GO:1900274	regulation of phospholipase C activity	2/96	34/23328	0.00863004	0.060008	0.044322	Flt1/Cd86	2
GO:0045582	BP	GO:0045582	positive regulation of T cell differentiation	3/96	102/23328	0.00864239	0.060008	0.044322	Cd83/Nfkbiz/Il1a	3
GO:0050848	BP	GO:0050848	regulation of calcium-mediated signaling	3/96	102/23328	0.00864239	0.060008	0.044322	Pde4d/Rcan1/Ccl4	3
GO:0003300	BP	GO:0003300	cardiac muscle hypertrophy	3/96	103/23328	0.0088755	0.0613756	0.0453321	Mef2a/Lmna/Errfi1	3
GO:0006913	BP	GO:0006913	nucleocytoplasmic transport	5/96	308/23328	0.00893757	0.0613756	0.0453321	Lmna/Bag3/Cdkn1a/Ier3/Egr2	5
GO:0051169	BP	GO:0051169	nuclear transport	5/96	308/23328	0.00893757	0.0613756	0.0453321	Lmna/Bag3/Cdkn1a/Ier3/Egr2	5
GO:0016032	BP	GO:0016032	viral process	5/96	309/23328	0.00905565	0.0613756	0.0453321	Oasl2/Jun/Uvrag/Zfp36/Ccl4	5
GO:0046916	BP	GO:0046916	cellular transition metal ion homeostasis	3/96	104/23328	0.00911228	0.0613756	0.0453321	Slc30a1/Mt2/Lcn2	3
GO:1901222	BP	GO:1901222	regulation of NIK/NF-kappaB signaling	3/96	104/23328	0.00911228	0.0613756	0.0453321	Cd86/Tlr2/Cd14	3
GO:0006458	BP	GO:0006458	'de novo' protein folding	2/96	35/23328	0.00912873	0.0613756	0.0453321	Dnajb1/Hspa1a	2
GO:0010837	BP	GO:0010837	regulation of keratinocyte proliferation	2/96	35/23328	0.00912873	0.0613756	0.0453321	Zfp36l1/Zfp36	2
GO:0014047	BP	GO:0014047	glutamate secretion	2/96	35/23328	0.00912873	0.0613756	0.0453321	Avp/Bdnf	2
GO:0032660	BP	GO:0032660	regulation of interleukin-17 production	2/96	35/23328	0.00912873	0.0613756	0.0453321	Osm/Tlr2	2
GO:0051084	BP	GO:0051084	'de novo' posttranslational protein folding	2/96	35/23328	0.00912873	0.0613756	0.0453321	Dnajb1/Hspa1a	2
GO:0007254	BP	GO:0007254	JNK cascade	4/96	200/23328	0.00943412	0.0630654	0.0465802	Per1/Il1a/Gadd45g/Gadd45b	4
GO:0050870	BP	GO:0050870	positive regulation of T cell activation	4/96	200/23328	0.00943412	0.0630654	0.0465802	Cd83/Cd86/Nfkbiz/Il1a	4
GO:0050792	BP	GO:0050792	regulation of viral process	4/96	201/23328	0.00959594	0.0631745	0.0466608	Oasl2/Jun/Zfp36/Ccl4	4
GO:0008045	BP	GO:0008045	motor neuron axon guidance	2/96	36/23328	0.00964001	0.0631745	0.0466608	Cxcl12/Egr2	2
GO:0031572	BP	GO:0031572	G2 DNA damage checkpoint	2/96	36/23328	0.00964001	0.0631745	0.0466608	Cdkn1a/Ier3	2
GO:0048169	BP	GO:0048169	regulation of long-term neuronal synaptic plasticity	2/96	36/23328	0.00964001	0.0631745	0.0466608	Egr1/Bdnf	2
GO:0050779	BP	GO:0050779	RNA destabilization	2/96	36/23328	0.00964001	0.0631745	0.0466608	Zfp36l1/Zfp36	2
GO:1904707	BP	GO:1904707	positive regulation of vascular associated smooth muscle cell proliferation	2/96	36/23328	0.00964001	0.0631745	0.0466608	Jun/Adamts1	2
GO:2000516	BP	GO:2000516	positive regulation of CD4-positive, alpha-beta T cell activation	2/96	36/23328	0.00964001	0.0631745	0.0466608	Cd83/Nfkbiz	2
GO:0000302	BP	GO:0000302	response to reactive oxygen species	4/96	202/23328	0.00975956	0.0637789	0.0471072	Jun/Gch1/Lcn2/Fos	4
GO:0014897	BP	GO:0014897	striated muscle hypertrophy	3/96	107/23328	0.0098447	0.0641556	0.0473854	Mef2a/Lmna/Errfi1	3
GO:0046651	BP	GO:0046651	lymphocyte proliferation	5/96	317/23328	0.0100394	0.065242	0.0481879	Cxcl12/Cebpb/Cdkn1a/Cd86/Il1a	5
GO:0048661	BP	GO:0048661	positive regulation of smooth muscle cell proliferation	3/96	108/23328	0.0100962	0.0654293	0.0483262	Jun/Egr1/Adamts1	3
GO:0002691	BP	GO:0002691	regulation of cellular extravasation	2/96	37/23328	0.0101638	0.065503	0.0483806	Cxcl12/Il1a	2
GO:0002931	BP	GO:0002931	response to ischemia	2/96	37/23328	0.0101638	0.065503	0.0483806	Egr1/Rcan1	2
GO:0045216	BP	GO:0045216	cell-cell junction organization	4/96	205/23328	0.0102613	0.0659493	0.0487102	Csk/Ramp2/Pmp22/Gjb2	4
GO:0014896	BP	GO:0014896	muscle hypertrophy	3/96	109/23328	0.0103515	0.0661646	0.0488693	Mef2a/Lmna/Errfi1	3
GO:0051028	BP	GO:0051028	mRNA transport	3/96	109/23328	0.0103515	0.0661646	0.0488693	Igf2bp3/Zfp36l1/Zfp36	3
GO:0032943	BP	GO:0032943	mononuclear cell proliferation	5/96	320/23328	0.0104265	0.0664619	0.0490889	Cxcl12/Cebpb/Cdkn1a/Cd86/Il1a	5
GO:0038061	BP	GO:0038061	NIK/NF-kappaB signaling	3/96	110/23328	0.0106105	0.0665677	0.0491671	Cd86/Tlr2/Cd14	3
GO:0018108	BP	GO:0018108	peptidyl-tyrosine phosphorylation	5/96	322/23328	0.0106902	0.0665677	0.0491671	Flt1/Errfi1/Osm/Gprc5a/Socs3	5
GO:0032228	BP	GO:0032228	regulation of synaptic transmission, GABAergic	2/96	38/23328	0.0106999	0.0665677	0.0491671	Bdnf/Npas4	2
GO:0032733	BP	GO:0032733	positive regulation of interleukin-10 production	2/96	38/23328	0.0106999	0.0665677	0.0491671	Cd83/Tlr2	2
GO:0035335	BP	GO:0035335	peptidyl-tyrosine dephosphorylation	2/96	38/23328	0.0106999	0.0665677	0.0491671	Dusp6/Dusp1	2
GO:0048265	BP	GO:0048265	response to pain	2/96	38/23328	0.0106999	0.0665677	0.0491671	Osm/Gch1	2
GO:0060674	BP	GO:0060674	placenta blood vessel development	2/96	38/23328	0.0106999	0.0665677	0.0491671	Junb/Socs3	2
GO:0070528	BP	GO:0070528	protein kinase C signaling	2/96	38/23328	0.0106999	0.0665677	0.0491671	Avp/Akap12	2
GO:0090322	BP	GO:0090322	regulation of superoxide metabolic process	2/96	38/23328	0.0106999	0.0665677	0.0491671	Gch1/Cxcl1	2
GO:0001666	BP	GO:0001666	response to hypoxia	4/96	208/23328	0.0107795	0.0667069	0.0492698	Flt1/Cbfa2t3/Zfp36l1/Egr1	4
GO:1904018	BP	GO:1904018	positive regulation of vasculature development	4/96	208/23328	0.0107795	0.0667069	0.0492698	Flt1/Ramp2/Egr1/Il1a	4
GO:0008630	BP	GO:0008630	intrinsic apoptotic signaling pathway in response to DNA damage	3/96	111/23328	0.0108732	0.0671092	0.049567	Cxcl12/Cdkn1a/Ier3	3
GO:0018212	BP	GO:0018212	peptidyl-tyrosine modification	5/96	325/23328	0.0110943	0.068293	0.0504414	Flt1/Errfi1/Osm/Gprc5a/Socs3	5
GO:2000403	BP	GO:2000403	positive regulation of lymphocyte migration	2/96	39/23328	0.0112483	0.0690588	0.051007	Cxcl12/Ccl4	2
GO:0042098	BP	GO:0042098	T cell proliferation	4/96	213/23328	0.0116802	0.0711716	0.0525675	Cxcl12/Cebpb/Cd86/Il1a	4
GO:0010927	BP	GO:0010927	cellular component assembly involved in morphogenesis	3/96	114/23328	0.011684	0.0711716	0.0525675	Mef2a/Pmp22/Tlr2	3
GO:2000379	BP	GO:2000379	positive regulation of reactive oxygen species metabolic process	3/96	114/23328	0.011684	0.0711716	0.0525675	Cdkn1a/Tlr2/Cxcl1	3
GO:0007616	BP	GO:0007616	long-term memory	2/96	40/23328	0.0118089	0.0713735	0.0527166	Egr1/Npas4	2
GO:0032633	BP	GO:0032633	interleukin-4 production	2/96	40/23328	0.0118089	0.0713735	0.0527166	Cebpb/Cd83	2
GO:0048741	BP	GO:0048741	skeletal muscle fiber development	2/96	40/23328	0.0118089	0.0713735	0.0527166	Pmp22/Rcan1	2
GO:0018105	BP	GO:0018105	peptidyl-serine phosphorylation	5/96	331/23328	0.0119336	0.0719411	0.0531358	Avp/Pde4d/Osm/Bdnf/Ppp1r15a	5
GO:0062197	BP	GO:0062197	cellular response to chemical stress	5/96	332/23328	0.0120776	0.0726214	0.0536383	Zfp36l1/Jun/Gch1/Lcn2/Fos	5
GO:0035264	BP	GO:0035264	multicellular organism growth	4/96	216/23328	0.0122432	0.0734276	0.0542337	Zfp36l1/Pde4d/Slc25a25/Pmp22	4
GO:0002686	BP	GO:0002686	negative regulation of leukocyte migration	2/96	41/23328	0.0123815	0.073689	0.0544268	Cxcl12/Dusp1	2
GO:0014037	BP	GO:0014037	Schwann cell differentiation	2/96	41/23328	0.0123815	0.073689	0.0544268	Pmp22/Egr2	2
GO:0071364	BP	GO:0071364	cellular response to epidermal growth factor stimulus	2/96	41/23328	0.0123815	0.073689	0.0544268	Zfp36l1/Zfp36	2
GO:0031668	BP	GO:0031668	cellular response to extracellular stimulus	4/96	217/23328	0.0124346	0.0738168	0.0545212	Jun/Cdkn1a/Atf3/Fos	4
GO:0045621	BP	GO:0045621	positive regulation of lymphocyte differentiation	3/96	117/23328	0.0125287	0.0739986	0.0546555	Cd83/Nfkbiz/Il1a	3
GO:0071901	BP	GO:0071901	negative regulation of protein serine/threonine kinase activity	3/96	117/23328	0.0125287	0.0739986	0.0546555	Dusp6/Dusp1/Cdkn1a	3
GO:0043434	BP	GO:0043434	response to peptide hormone	5/96	336/23328	0.0126654	0.0746168	0.0551121	Csk/Zfp36l1/Egr1/Egr2/Socs3	5
GO:0070838	BP	GO:0070838	divalent metal ion transport	6/96	467/23328	0.0127315	0.0748179	0.0552606	Cxcl12/Ramp2/Slc30a1/Pde4d/Slc25a25/Ccl4	6
GO:0046632	BP	GO:0046632	alpha-beta T cell differentiation	3/96	118/23328	0.0128179	0.0749475	0.0553563	Cd83/Nfkbiz/Gadd45g	3
GO:1904019	BP	GO:1904019	epithelial cell apoptotic process	3/96	118/23328	0.0128179	0.0749475	0.0553563	Ramp2/Zfp36l1/Zfp36	3
GO:2000279	BP	GO:2000279	negative regulation of DNA biosynthetic process	2/96	42/23328	0.0129661	0.0756247	0.0558566	Dusp1/Cdkn1a	2
GO:0072511	BP	GO:0072511	divalent inorganic cation transport	6/96	470/23328	0.0131048	0.0762433	0.0563134	Cxcl12/Ramp2/Slc30a1/Pde4d/Slc25a25/Ccl4	6
GO:0060047	BP	GO:0060047	heart contraction	4/96	221/23328	0.0132197	0.0765297	0.056525	Pmch/Mef2a/Pde4d/Gch1	4
GO:1903039	BP	GO:1903039	positive regulation of leukocyte cell-cell adhesion	4/96	221/23328	0.0132197	0.0765297	0.056525	Cd83/Cd86/Nfkbiz/Il1a	4
GO:0032620	BP	GO:0032620	interleukin-17 production	2/96	43/23328	0.0135625	0.0783201	0.0578474	Osm/Tlr2	2
GO:0002688	BP	GO:0002688	regulation of leukocyte chemotaxis	3/96	121/23328	0.0137082	0.078966	0.0583244	Cxcl12/Dusp1/Ccl4	3
GO:0070661	BP	GO:0070661	leukocyte proliferation	5/96	344/23328	0.0138985	0.0798649	0.0589884	Cxcl12/Cebpb/Cdkn1a/Cd86/Il1a	5
GO:0048608	BP	GO:0048608	reproductive structure development	6/96	477/23328	0.0140056	0.0800487	0.0591241	Zfp36l1/Cebpb/Adamts1/Il1a/Junb/Socs3	6
GO:0010972	BP	GO:0010972	negative regulation of G2/M transition of mitotic cell cycle	2/96	44/23328	0.0141706	0.0800487	0.0591241	Cdkn1a/Ier3	2
GO:0014904	BP	GO:0014904	myotube cell development	2/96	44/23328	0.0141706	0.0800487	0.0591241	Pmp22/Rcan1	2
GO:0016925	BP	GO:0016925	protein sumoylation	2/96	44/23328	0.0141706	0.0800487	0.0591241	Egr1/Egr2	2
GO:0032768	BP	GO:0032768	regulation of monooxygenase activity	2/96	44/23328	0.0141706	0.0800487	0.0591241	Gch1/Il1a	2
GO:0034198	BP	GO:0034198	cellular response to amino acid starvation	2/96	44/23328	0.0141706	0.0800487	0.0591241	Cdkn1a/Atf3	2
GO:0070849	BP	GO:0070849	response to epidermal growth factor	2/96	44/23328	0.0141706	0.0800487	0.0591241	Zfp36l1/Zfp36	2
GO:0031667	BP	GO:0031667	response to nutrient levels	5/96	346/23328	0.014219	0.0800786	0.0591462	Jun/Slc25a25/Cdkn1a/Zfp36/Atf3	5
GO:0043406	BP	GO:0043406	positive regulation of MAP kinase activity	4/96	226/23328	0.0142446	0.0800786	0.0591462	Flt1/Csk/Gadd45g/Gadd45b	4
GO:0007005	BP	GO:0007005	mitochondrion organization	6/96	481/23328	0.0145394	0.0813439	0.0600808	Avp/Mef2a/Jun/Lmna/Bag3/Ier3	6
GO:0061458	BP	GO:0061458	reproductive system development	6/96	481/23328	0.0145394	0.0813439	0.0600808	Zfp36l1/Cebpb/Adamts1/Il1a/Junb/Socs3	6
GO:0043500	BP	GO:0043500	muscle adaptation	3/96	124/23328	0.014633	0.0813822	0.0601091	Mef2a/Lmna/Errfi1	3
GO:0031348	BP	GO:0031348	negative regulation of defense response	4/96	228/23328	0.0146683	0.0813822	0.0601091	Gpr17/Ier3/Zfp36/Socs3	4
GO:0001569	BP	GO:0001569	branching involved in blood vessel morphogenesis	2/96	45/23328	0.0147904	0.0813822	0.0601091	Cxcl12/Flt1	2
GO:0032873	BP	GO:0032873	negative regulation of stress-activated MAPK cascade	2/96	45/23328	0.0147904	0.0813822	0.0601091	Per1/Dusp1	2
GO:0042181	BP	GO:0042181	ketone biosynthetic process	2/96	45/23328	0.0147904	0.0813822	0.0601091	Coq10b/Egr1	2
GO:0070303	BP	GO:0070303	negative regulation of stress-activated protein kinase signaling cascade	2/96	45/23328	0.0147904	0.0813822	0.0601091	Per1/Dusp1	2
GO:0090199	BP	GO:0090199	regulation of release of cytochrome c from mitochondria	2/96	45/23328	0.0147904	0.0813822	0.0601091	Avp/Lmna	2
GO:0003015	BP	GO:0003015	heart process	4/96	231/23328	0.0153187	0.0836718	0.0618002	Pmch/Mef2a/Pde4d/Gch1	4
GO:0050670	BP	GO:0050670	regulation of lymphocyte proliferation	4/96	231/23328	0.0153187	0.0836718	0.0618002	Cebpb/Cdkn1a/Cd86/Il1a	4
GO:0010518	BP	GO:0010518	positive regulation of phospholipase activity	2/96	46/23328	0.0154217	0.0836718	0.0618002	Flt1/Cd86	2
GO:0031952	BP	GO:0031952	regulation of protein autophosphorylation	2/96	46/23328	0.0154217	0.0836718	0.0618002	Jun/Errfi1	2
GO:0043616	BP	GO:0043616	keratinocyte proliferation	2/96	46/23328	0.0154217	0.0836718	0.0618002	Zfp36l1/Zfp36	2
GO:0098926	BP	GO:0098926	postsynaptic signal transduction	2/96	46/23328	0.0154217	0.0836718	0.0618002	Ly6a/Ly6c1	2
GO:0006417	BP	GO:0006417	regulation of translation	5/96	355/23328	0.0157229	0.0851078	0.0628608	Igf2bp3/Per1/Zfp36l1/Ppp1r15a/Zfp36	5
GO:1901342	BP	GO:1901342	regulation of vasculature development	5/96	356/23328	0.0158963	0.0858473	0.063407	Flt1/Ramp2/Egr1/Adamts1/Il1a	5
GO:0032944	BP	GO:0032944	regulation of mononuclear cell proliferation	4/96	234/23328	0.015987	0.0859394	0.063475	Cebpb/Cdkn1a/Cd86/Il1a	4
GO:0036293	BP	GO:0036293	response to decreased oxygen levels	4/96	234/23328	0.015987	0.0859394	0.063475	Flt1/Cbfa2t3/Zfp36l1/Egr1	4
GO:0018209	BP	GO:0018209	peptidyl-serine modification	5/96	357/23328	0.016071	0.0861921	0.0636617	Avp/Pde4d/Osm/Bdnf/Ppp1r15a	5
GO:0006470	BP	GO:0006470	protein dephosphorylation	4/96	235/23328	0.0162138	0.0865603	0.0639336	Dusp6/Dusp1/Ppp1r15a/Rcan1	4
GO:0032868	BP	GO:0032868	response to insulin	4/96	235/23328	0.0162138	0.0865603	0.0639336	Zfp36l1/Egr1/Egr2/Socs3	4
GO:0014065	BP	GO:0014065	phosphatidylinositol 3-kinase signaling	3/96	129/23328	0.0162513	0.0865622	0.063935	Flt1/Zfp36l1/Osm	3
GO:0033002	BP	GO:0033002	muscle cell proliferation	4/96	236/23328	0.0164426	0.087382	0.0645405	Jun/Egr1/Cdkn1a/Adamts1	4
GO:0001774	BP	GO:0001774	microglial cell activation	2/96	48/23328	0.0167185	0.08765	0.0647385	Jun/Tlr2	2
GO:0002269	BP	GO:0002269	leukocyte activation involved in inflammatory response	2/96	48/23328	0.0167185	0.08765	0.0647385	Jun/Tlr2	2
GO:0006110	BP	GO:0006110	regulation of glycolytic process	2/96	48/23328	0.0167185	0.08765	0.0647385	Cbfa2t3/Ier3	2
GO:0048010	BP	GO:0048010	vascular endothelial growth factor receptor signaling pathway	2/96	48/23328	0.0167185	0.08765	0.0647385	Flt1/Tmem204	2
GO:0090279	BP	GO:0090279	regulation of calcium ion import	2/96	48/23328	0.0167185	0.08765	0.0647385	Cxcl12/Slc30a1	2
GO:1990928	BP	GO:1990928	response to amino acid starvation	2/96	48/23328	0.0167185	0.08765	0.0647385	Cdkn1a/Atf3	2
GO:0010469	BP	GO:0010469	regulation of signaling receptor activity	3/96	132/23328	0.0172686	0.0903259	0.0667149	Errfi1/Gprc5a/Nptx2	3
GO:0010332	BP	GO:0010332	response to gamma radiation	2/96	49/23328	0.0173838	0.0903259	0.0667149	Egr1/Cdkn1a	2
GO:0014888	BP	GO:0014888	striated muscle adaptation	2/96	49/23328	0.0173838	0.0903259	0.0667149	Lmna/Errfi1	2
GO:0046638	BP	GO:0046638	positive regulation of alpha-beta T cell differentiation	2/96	49/23328	0.0173838	0.0903259	0.0667149	Cd83/Nfkbiz	2
GO:0044070	BP	GO:0044070	regulation of anion transport	3/96	133/23328	0.0176155	0.0911328	0.0673109	Avp/Cebpb/Il1a	3
GO:0046777	BP	GO:0046777	protein autophosphorylation	4/96	241/23328	0.0176172	0.0911328	0.0673109	Flt1/Csk/Jun/Errfi1	4
GO:0001936	BP	GO:0001936	regulation of endothelial cell proliferation	3/96	134/23328	0.0179663	0.0919964	0.0679487	Cxcl12/Flt1/Jun	3
GO:0055076	BP	GO:0055076	transition metal ion homeostasis	3/96	134/23328	0.0179663	0.0919964	0.0679487	Slc30a1/Mt2/Lcn2	3
GO:1903038	BP	GO:1903038	negative regulation of leukocyte cell-cell adhesion	3/96	134/23328	0.0179663	0.0919964	0.0679487	Cxcl12/Cebpb/Cd86	3
GO:0010677	BP	GO:0010677	negative regulation of cellular carbohydrate metabolic process	2/96	50/23328	0.0180602	0.0919964	0.0679487	Cbfa2t3/Ier3	2
GO:0034332	BP	GO:0034332	adherens junction organization	2/96	50/23328	0.0180602	0.0919964	0.0679487	Csk/Ramp2	2
GO:0043370	BP	GO:0043370	regulation of CD4-positive, alpha-beta T cell differentiation	2/96	50/23328	0.0180602	0.0919964	0.0679487	Cd83/Nfkbiz	2
GO:0045646	BP	GO:0045646	regulation of erythrocyte differentiation	2/96	50/23328	0.0180602	0.0919964	0.0679487	Zfp36l1/Zfp36	2
GO:0090257	BP	GO:0090257	regulation of muscle system process	4/96	244/23328	0.0183465	0.0932511	0.0688755	Mef2a/Pde4d/Lmna/Errfi1	4
GO:0000288	BP	GO:0000288	nuclear-transcribed mRNA catabolic process, deadenylation-dependent decay	2/96	51/23328	0.0187476	0.0948764	0.0700759	Zfp36l1/Zfp36	2
GO:0032722	BP	GO:0032722	positive regulation of chemokine production	2/96	51/23328	0.0187476	0.0948764	0.0700759	Tlr2/Il1a	2
GO:0015980	BP	GO:0015980	energy derivation by oxidation of organic compounds	4/96	248/23328	0.0193477	0.0967318	0.0714463	Cbfa2t3/Coq10b/Slc25a25/Bdnf	4
GO:0030218	BP	GO:0030218	erythrocyte differentiation	3/96	138/23328	0.0194082	0.0967318	0.0714463	Zfp36l1/Zfp36/Hba-a1	3
GO:0050671	BP	GO:0050671	positive regulation of lymphocyte proliferation	3/96	138/23328	0.0194082	0.0967318	0.0714463	Cdkn1a/Cd86/Il1a	3
GO:0009620	BP	GO:0009620	response to fungus	2/96	52/23328	0.0194459	0.0967318	0.0714463	Tlr2/Cxcl1	2
GO:0032481	BP	GO:0032481	positive regulation of type I interferon production	2/96	52/23328	0.0194459	0.0967318	0.0714463	Tlr2/Cd14	2
GO:0032757	BP	GO:0032757	positive regulation of interleukin-8 production	2/96	52/23328	0.0194459	0.0967318	0.0714463	Tlr2/Cd14	2
GO:0060612	BP	GO:0060612	adipose tissue development	2/96	52/23328	0.0194459	0.0967318	0.0714463	Lmna/Slc25a25	2
GO:0061014	BP	GO:0061014	positive regulation of mRNA catabolic process	2/96	52/23328	0.0194459	0.0967318	0.0714463	Zfp36l1/Zfp36	2
GO:0070663	BP	GO:0070663	regulation of leukocyte proliferation	4/96	251/23328	0.0201205	0.0994115	0.0734255	Cebpb/Cdkn1a/Cd86/Il1a	4
GO:0032946	BP	GO:0032946	positive regulation of mononuclear cell proliferation	3/96	140/23328	0.0201526	0.0994115	0.0734255	Cdkn1a/Cd86/Il1a	3
GO:0046330	BP	GO:0046330	positive regulation of JNK cascade	3/96	140/23328	0.0201526	0.0994115	0.0734255	Il1a/Gadd45g/Gadd45b	3
GO:0043666	BP	GO:0043666	regulation of phosphoprotein phosphatase activity	2/96	53/23328	0.020155	0.0994115	0.0734255	Ppp1r15a/Rcan1	2
GO:0046034	BP	GO:0046034	ATP metabolic process	4/96	253/23328	0.0206461	0.101619	0.0750559	Cbfa2t3/Slc25a25/Ier3/Bdnf	4
GO:0045687	BP	GO:0045687	positive regulation of glial cell differentiation	2/96	54/23328	0.0208749	0.102069	0.0753882	Tlr2/Egr2	2
GO:0051954	BP	GO:0051954	positive regulation of amine transport	2/96	54/23328	0.0208749	0.102069	0.0753882	Avp/Cxcl12	2
GO:0061077	BP	GO:0061077	chaperone-mediated protein folding	2/96	54/23328	0.0208749	0.102069	0.0753882	Dnajb1/Hspa1a	2
GO:1901991	BP	GO:1901991	negative regulation of mitotic cell cycle phase transition	3/96	142/23328	0.0209125	0.102069	0.0753882	Zfp36l1/Cdkn1a/Ier3	3
GO:0032892	BP	GO:0032892	positive regulation of organic acid transport	2/96	55/23328	0.0216053	0.104326	0.0770556	Avp/Il1a	2
GO:0035176	BP	GO:0035176	social behavior	2/96	55/23328	0.0216053	0.104326	0.0770556	Avp/Npas4	2
GO:0045912	BP	GO:0045912	negative regulation of carbohydrate metabolic process	2/96	55/23328	0.0216053	0.104326	0.0770556	Cbfa2t3/Ier3	2
GO:1902750	BP	GO:1902750	negative regulation of cell cycle G2/M phase transition	2/96	55/23328	0.0216053	0.104326	0.0770556	Cdkn1a/Ier3	2
GO:0072089	BP	GO:0072089	stem cell proliferation	3/96	144/23328	0.0216881	0.104326	0.0770556	Zfp36l1/Bdnf/Cxcl1	3
GO:0106106	BP	GO:0106106	cold-induced thermogenesis	3/96	144/23328	0.0216881	0.104326	0.0770556	Cebpb/Gadd45g/Lcn2	3
GO:0120161	BP	GO:0120161	regulation of cold-induced thermogenesis	3/96	144/23328	0.0216881	0.104326	0.0770556	Cebpb/Gadd45g/Lcn2	3
GO:1903532	BP	GO:1903532	positive regulation of secretion by cell	5/96	388/23328	0.0221385	0.106179	0.0784241	Avp/Cxcl12/Tlr2/Il1a/Cd14	5
GO:0007618	BP	GO:0007618	mating	2/96	56/23328	0.0223463	0.106179	0.0784241	Avp/Pmp22	2
GO:0035924	BP	GO:0035924	cellular response to vascular endothelial growth factor stimulus	2/96	56/23328	0.0223463	0.106179	0.0784241	Flt1/Ramp2	2
GO:0051932	BP	GO:0051932	synaptic transmission, GABAergic	2/96	56/23328	0.0223463	0.106179	0.0784241	Bdnf/Npas4	2
GO:0061900	BP	GO:0061900	glial cell activation	2/96	56/23328	0.0223463	0.106179	0.0784241	Jun/Tlr2	2
GO:0071675	BP	GO:0071675	regulation of mononuclear cell migration	2/96	56/23328	0.0223463	0.106179	0.0784241	Cxcl12/Dusp1	2
GO:0051098	BP	GO:0051098	regulation of binding	5/96	390/23328	0.0225746	0.107046	0.0790644	Runx1t1/Ramp2/Jun/Cdkn1a/Bdnf	5
GO:0007043	BP	GO:0007043	cell-cell junction assembly	3/96	147/23328	0.0228807	0.108277	0.0799736	Ramp2/Pmp22/Gjb2	3
GO:0051591	BP	GO:0051591	response to cAMP	2/96	57/23328	0.0230977	0.109083	0.0805689	Per1/Zfp36l1	2
GO:0050730	BP	GO:0050730	regulation of peptidyl-tyrosine phosphorylation	4/96	263/23328	0.023401	0.110292	0.0814619	Errfi1/Osm/Gprc5a/Socs3	4
GO:0001935	BP	GO:0001935	endothelial cell proliferation	3/96	149/23328	0.0236953	0.110885	0.0818997	Cxcl12/Flt1/Jun	3
GO:0034101	BP	GO:0034101	erythrocyte homeostasis	3/96	149/23328	0.0236953	0.110885	0.0818997	Zfp36l1/Zfp36/Hba-a1	3
GO:0010517	BP	GO:0010517	regulation of phospholipase activity	2/96	58/23328	0.0238595	0.110885	0.0818997	Flt1/Cd86	2
GO:0010761	BP	GO:0010761	fibroblast migration	2/96	58/23328	0.0238595	0.110885	0.0818997	Pmp22/Akap12	2
GO:0032653	BP	GO:0032653	regulation of interleukin-10 production	2/96	58/23328	0.0238595	0.110885	0.0818997	Cd83/Tlr2	2
GO:0043470	BP	GO:0043470	regulation of carbohydrate catabolic process	2/96	58/23328	0.0238595	0.110885	0.0818997	Cbfa2t3/Ier3	2
GO:0051703	BP	GO:0051703	intraspecies interaction between organisms	2/96	58/23328	0.0238595	0.110885	0.0818997	Avp/Npas4	2
GO:0022409	BP	GO:0022409	positive regulation of cell-cell adhesion	4/96	265/23328	0.0239775	0.110991	0.0819784	Cd83/Cd86/Nfkbiz/Il1a	4
GO:1901990	BP	GO:1901990	regulation of mitotic cell cycle phase transition	4/96	265/23328	0.0239775	0.110991	0.0819784	Zfp36l1/Cdkn1a/Ier3/Adamts1	4
GO:0044773	BP	GO:0044773	mitotic DNA damage checkpoint	2/96	59/23328	0.0246315	0.113344	0.0837158	Cdkn1a/Ier3	2
GO:0060193	BP	GO:0060193	positive regulation of lipase activity	2/96	59/23328	0.0246315	0.113344	0.0837158	Flt1/Cd86	2
GO:0071156	BP	GO:0071156	regulation of cell cycle arrest	2/96	59/23328	0.0246315	0.113344	0.0837158	Rassf1/Cdkn1a	2
GO:0006091	BP	GO:0006091	generation of precursor metabolites and energy	5/96	400/23328	0.0248391	0.11385	0.0840897	Cbfa2t3/Coq10b/Slc25a25/Ier3/Bdnf	5
GO:1901652	BP	GO:1901652	response to peptide	5/96	400/23328	0.0248391	0.11385	0.0840897	Csk/Zfp36l1/Egr1/Egr2/Socs3	5
GO:0070665	BP	GO:0070665	positive regulation of leukocyte proliferation	3/96	152/23328	0.0249464	0.114118	0.0842875	Cdkn1a/Cd86/Il1a	3
GO:2000401	BP	GO:2000401	regulation of lymphocyte migration	2/96	60/23328	0.0254136	0.116027	0.0856979	Cxcl12/Ccl4	2
GO:0014013	BP	GO:0014013	regulation of gliogenesis	3/96	154/23328	0.0258	0.117561	0.0868311	Pmp22/Tlr2/Egr2	3
GO:0042698	BP	GO:0042698	ovulation cycle	2/96	61/23328	0.0262058	0.118715	0.0876828	Egr1/Adamts1	2
GO:0051851	BP	GO:0051851	modulation by host of symbiont process	2/96	61/23328	0.0262058	0.118715	0.0876828	Jun/Ccl4	2
GO:0061912	BP	GO:0061912	selective autophagy	2/96	61/23328	0.0262058	0.118715	0.0876828	Bag3/Tlr2	2
GO:0009267	BP	GO:0009267	cellular response to starvation	3/96	156/23328	0.0266692	0.12047	0.0889795	Jun/Cdkn1a/Atf3	3
GO:0043588	BP	GO:0043588	skin development	4/96	275/23328	0.0269895	0.12047	0.0889795	Zfp36l1/Errfi1/Il1a/Zfp36	4
GO:0051924	BP	GO:0051924	regulation of calcium ion transport	4/96	275/23328	0.0269895	0.12047	0.0889795	Cxcl12/Slc30a1/Pde4d/Ccl4	4
GO:0006979	BP	GO:0006979	response to oxidative stress	5/96	409/23328	0.0269982	0.12047	0.0889795	Jun/Gch1/Lcn2/Rcan1/Fos	5
GO:0014911	BP	GO:0014911	positive regulation of smooth muscle cell migration	2/96	62/23328	0.0270079	0.12047	0.0889795	Egr1/Adamts1	2
GO:0032613	BP	GO:0032613	interleukin-10 production	2/96	62/23328	0.0270079	0.12047	0.0889795	Cd83/Tlr2	2
GO:0048512	BP	GO:0048512	circadian behavior	2/96	62/23328	0.0270079	0.12047	0.0889795	Pmch/Egr1	2
GO:0061337	BP	GO:0061337	cardiac conduction	2/96	62/23328	0.0270079	0.12047	0.0889795	Mef2a/Pde4d	2
GO:0050657	BP	GO:0050657	nucleic acid transport	3/96	157/23328	0.0271097	0.12047	0.0889795	Igf2bp3/Zfp36l1/Zfp36	3
GO:0050658	BP	GO:0050658	RNA transport	3/96	157/23328	0.0271097	0.12047	0.0889795	Igf2bp3/Zfp36l1/Zfp36	3
GO:0034248	BP	GO:0034248	regulation of cellular amide metabolic process	5/96	410/23328	0.0272453	0.120843	0.0892547	Igf2bp3/Per1/Zfp36l1/Ppp1r15a/Zfp36	5
GO:0034599	BP	GO:0034599	cellular response to oxidative stress	4/96	276/23328	0.0273026	0.120867	0.0892725	Jun/Gch1/Lcn2/Fos	4
GO:1901988	BP	GO:1901988	negative regulation of cell cycle phase transition	3/96	158/23328	0.027554	0.121749	0.0899241	Zfp36l1/Cdkn1a/Ier3	3
GO:0010830	BP	GO:0010830	regulation of myotube differentiation	2/96	63/23328	0.0278198	0.12246	0.090449	Cxcl12/Bdnf	2
GO:0071479	BP	GO:0071479	cellular response to ionizing radiation	2/96	63/23328	0.0278198	0.12246	0.090449	Egr1/Cdkn1a	2
GO:0045580	BP	GO:0045580	regulation of T cell differentiation	3/96	159/23328	0.0280022	0.122799	0.0906998	Cd83/Nfkbiz/Il1a	3
GO:1990845	BP	GO:1990845	adaptive thermogenesis	3/96	159/23328	0.0280022	0.122799	0.0906998	Cebpb/Gadd45g/Lcn2	3
GO:0051236	BP	GO:0051236	establishment of RNA localization	3/96	160/23328	0.0284544	0.124548	0.0919913	Igf2bp3/Zfp36l1/Zfp36	3
GO:0008347	BP	GO:0008347	glial cell migration	2/96	64/23328	0.0286416	0.125132	0.0924231	Pmp22/Ccl3	2
GO:0051251	BP	GO:0051251	positive regulation of lymphocyte activation	5/96	416/23328	0.0287582	0.125407	0.0926259	Cd83/Cdkn1a/Cd86/Nfkbiz/Il1a	5
GO:0006865	BP	GO:0006865	amino acid transport	3/96	162/23328	0.0293702	0.12757	0.0942237	Avp/Slc38a5/Bdnf	3
GO:0042093	BP	GO:0042093	T-helper cell differentiation	2/96	65/23328	0.029473	0.12757	0.0942237	Nfkbiz/Gadd45g	2
GO:0044774	BP	GO:0044774	mitotic DNA integrity checkpoint	2/96	65/23328	0.029473	0.12757	0.0942237	Cdkn1a/Ier3	2
GO:2000514	BP	GO:2000514	regulation of CD4-positive, alpha-beta T cell activation	2/96	65/23328	0.029473	0.12757	0.0942237	Cd83/Nfkbiz	2
GO:0002244	BP	GO:0002244	hematopoietic progenitor cell differentiation	3/96	163/23328	0.029834	0.128894	0.0952013	Flt1/Rbm47/Mlf1	3
GO:0048015	BP	GO:0048015	phosphatidylinositol-mediated signaling	3/96	164/23328	0.0303016	0.130484	0.0963758	Flt1/Zfp36l1/Osm	3
GO:0002294	BP	GO:0002294	CD4-positive, alpha-beta T cell differentiation involved in immune response	2/96	66/23328	0.0303139	0.130484	0.0963758	Nfkbiz/Gadd45g	2
GO:0006606	BP	GO:0006606	protein import into nucleus	3/96	165/23328	0.0307732	0.132217	0.0976556	Lmna/Bag3/Cdkn1a	3
GO:0070482	BP	GO:0070482	response to oxygen levels	4/96	287/23328	0.030891	0.132479	0.0978493	Flt1/Cbfa2t3/Zfp36l1/Egr1	4
GO:0002293	BP	GO:0002293	alpha-beta T cell differentiation involved in immune response	2/96	67/23328	0.0311644	0.133407	0.0985343	Nfkbiz/Gadd45g	2
GO:0007565	BP	GO:0007565	female pregnancy	3/96	166/23328	0.0312485	0.133522	0.0986193	Thbd/Junb/Timp1	3
GO:0001667	BP	GO:0001667	ameboidal-type cell migration	5/96	427/23328	0.0316684	0.134375	0.0992498	Cxcl12/Jun/Pmp22/Akap12/Timp1	5
GO:0042552	BP	GO:0042552	myelination	3/96	167/23328	0.0317278	0.134375	0.0992498	Pmp22/Tlr2/Egr2	3
GO:0045834	BP	GO:0045834	positive regulation of lipid metabolic process	3/96	167/23328	0.0317278	0.134375	0.0992498	Avp/Flt1/Il1a	3
GO:0048017	BP	GO:0048017	inositol lipid-mediated signaling	3/96	167/23328	0.0317278	0.134375	0.0992498	Flt1/Zfp36l1/Osm	3
GO:0007162	BP	GO:0007162	negative regulation of cell adhesion	4/96	290/23328	0.0319157	0.134375	0.0992498	Cxcl12/Cebpb/Dusp1/Cd86	4
GO:0002287	BP	GO:0002287	alpha-beta T cell activation involved in immune response	2/96	68/23328	0.0320243	0.134375	0.0992498	Nfkbiz/Gadd45g	2
GO:0015800	BP	GO:0015800	acidic amino acid transport	2/96	68/23328	0.0320243	0.134375	0.0992498	Avp/Bdnf	2
GO:0030968	BP	GO:0030968	endoplasmic reticulum unfolded protein response	2/96	68/23328	0.0320243	0.134375	0.0992498	Ppp1r15a/Atf3	2
GO:0046635	BP	GO:0046635	positive regulation of alpha-beta T cell activation	2/96	68/23328	0.0320243	0.134375	0.0992498	Cd83/Nfkbiz	2
GO:0046637	BP	GO:0046637	regulation of alpha-beta T cell differentiation	2/96	68/23328	0.0320243	0.134375	0.0992498	Cd83/Nfkbiz	2
GO:0071902	BP	GO:0071902	positive regulation of protein serine/threonine kinase activity	4/96	291/23328	0.0322617	0.135129	0.0998062	Flt1/Csk/Gadd45g/Gadd45b	4
GO:0032874	BP	GO:0032874	positive regulation of stress-activated MAPK cascade	3/96	169/23328	0.0326979	0.136065	0.100497	Il1a/Gadd45g/Gadd45b	3
GO:0051170	BP	GO:0051170	import into nucleus	3/96	169/23328	0.0326979	0.136065	0.100497	Lmna/Bag3/Cdkn1a	3
GO:0006801	BP	GO:0006801	superoxide metabolic process	2/96	69/23328	0.0328934	0.136065	0.100497	Gch1/Cxcl1	2
GO:0016239	BP	GO:0016239	positive regulation of macroautophagy	2/96	69/23328	0.0328934	0.136065	0.100497	Bag3/Tlr2	2
GO:0032677	BP	GO:0032677	regulation of interleukin-8 production	2/96	69/23328	0.0328934	0.136065	0.100497	Tlr2/Cd14	2
GO:0042058	BP	GO:0042058	regulation of epidermal growth factor receptor signaling pathway	2/96	69/23328	0.0328934	0.136065	0.100497	Errfi1/Gprc5a	2
GO:0048146	BP	GO:0048146	positive regulation of fibroblast proliferation	2/96	69/23328	0.0328934	0.136065	0.100497	Jun/Cdkn1a	2
GO:0007272	BP	GO:0007272	ensheathment of neurons	3/96	170/23328	0.0331887	0.136801	0.101041	Pmp22/Tlr2/Egr2	3
GO:0008366	BP	GO:0008366	axon ensheathment	3/96	170/23328	0.0331887	0.136801	0.101041	Pmp22/Tlr2/Egr2	3
GO:0071214	BP	GO:0071214	cellular response to abiotic stimulus	4/96	294/23328	0.033313	0.13683	0.101063	Zfp36l1/Bag3/Egr1/Cdkn1a	4
GO:0104004	BP	GO:0104004	cellular response to environmental stimulus	4/96	294/23328	0.033313	0.13683	0.101063	Zfp36l1/Bag3/Egr1/Cdkn1a	4
GO:0097193	BP	GO:0097193	intrinsic apoptotic signaling pathway	4/96	295/23328	0.0336678	0.137504	0.101561	Cxcl12/Cebpb/Cdkn1a/Ier3	4
GO:0070304	BP	GO:0070304	positive regulation of stress-activated protein kinase signaling cascade	3/96	171/23328	0.0336833	0.137504	0.101561	Il1a/Gadd45g/Gadd45b	3
GO:0032922	BP	GO:0032922	circadian regulation of gene expression	2/96	70/23328	0.0337718	0.137504	0.101561	Per1/Egr1	2
GO:0045669	BP	GO:0045669	positive regulation of osteoblast differentiation	2/96	70/23328	0.0337718	0.137504	0.101561	Lmna/Cebpb	2
GO:0150076	BP	GO:0150076	neuroinflammatory response	2/96	70/23328	0.0337718	0.137504	0.101561	Jun/Tlr2	2
GO:0045785	BP	GO:0045785	positive regulation of cell adhesion	5/96	435/23328	0.0338972	0.137774	0.10176	Cxcl12/Cd83/Cd86/Nfkbiz/Il1a	5
GO:1901987	BP	GO:1901987	regulation of cell cycle phase transition	4/96	297/23328	0.0343842	0.13951	0.103042	Zfp36l1/Cdkn1a/Ier3/Adamts1	4
GO:0007492	BP	GO:0007492	endoderm development	2/96	71/23328	0.0346593	0.139897	0.103328	Zfp36l1/Dusp1	2
GO:0042509	BP	GO:0042509	regulation of tyrosine phosphorylation of STAT protein	2/96	71/23328	0.0346593	0.139897	0.103328	Osm/Socs3	2
GO:0043407	BP	GO:0043407	negative regulation of MAP kinase activity	2/96	71/23328	0.0346593	0.139897	0.103328	Dusp6/Dusp1	2
GO:0001558	BP	GO:0001558	regulation of cell growth	5/96	438/23328	0.0347577	0.140051	0.103442	Avp/Cxcl12/Cdkn1a/Bdnf/Sertad1	5
GO:0051047	BP	GO:0051047	positive regulation of secretion	5/96	440/23328	0.0353388	0.142147	0.10499	Avp/Cxcl12/Tlr2/Il1a/Cd14	5
GO:0045123	BP	GO:0045123	cellular extravasation	2/96	72/23328	0.0355559	0.142774	0.105453	Cxcl12/Il1a	2
GO:0042129	BP	GO:0042129	regulation of T cell proliferation	3/96	175/23328	0.0357004	0.143108	0.1057	Cebpb/Cd86/Il1a	3
GO:0014068	BP	GO:0014068	positive regulation of phosphatidylinositol 3-kinase signaling	2/96	73/23328	0.0364614	0.145658	0.107583	Flt1/Osm	2
GO:0042130	BP	GO:0042130	negative regulation of T cell proliferation	2/96	73/23328	0.0364614	0.145658	0.107583	Cebpb/Cd86	2
GO:0019932	BP	GO:0019932	second-messenger-mediated signaling	5/96	445/23328	0.036818	0.146831	0.10845	Ramp2/Mt2/Pde4d/Rcan1/Ccl4	5
GO:0002292	BP	GO:0002292	T cell differentiation involved in immune response	2/96	74/23328	0.0373758	0.148548	0.109718	Nfkbiz/Gadd45g	2
GO:1901184	BP	GO:1901184	regulation of ERBB signaling pathway	2/96	74/23328	0.0373758	0.148548	0.109718	Errfi1/Gprc5a	2
GO:0007260	BP	GO:0007260	tyrosine phosphorylation of STAT protein	2/96	75/23328	0.0382989	0.150931	0.111478	Osm/Socs3	2
GO:0032637	BP	GO:0032637	interleukin-8 production	2/96	75/23328	0.0382989	0.150931	0.111478	Tlr2/Cd14	2
GO:0032642	BP	GO:0032642	regulation of chemokine production	2/96	75/23328	0.0382989	0.150931	0.111478	Tlr2/Il1a	2
GO:0048747	BP	GO:0048747	muscle fiber development	2/96	75/23328	0.0382989	0.150931	0.111478	Pmp22/Rcan1	2
GO:0051145	BP	GO:0051145	smooth muscle cell differentiation	2/96	75/23328	0.0382989	0.150931	0.111478	Tmem204/Ramp2	2
GO:0006403	BP	GO:0006403	RNA localization	3/96	182/23328	0.0393772	0.152994	0.113002	Igf2bp3/Zfp36l1/Zfp36	3
GO:0043524	BP	GO:0043524	negative regulation of neuron apoptotic process	3/96	182/23328	0.0393772	0.152994	0.113002	Jun/Cebpb/Bdnf	3
GO:0009895	BP	GO:0009895	negative regulation of catabolic process	4/96	311/23328	0.0396471	0.152994	0.113002	Cbfa2t3/Ier3/Zfp36/Timp1	4
GO:0033143	BP	GO:0033143	regulation of intracellular steroid hormone receptor signaling pathway	2/96	77/23328	0.0401712	0.152994	0.113002	Per1/Bdnf	2
GO:0061097	BP	GO:0061097	regulation of protein tyrosine kinase activity	2/96	77/23328	0.0401712	0.152994	0.113002	Errfi1/Gprc5a	2
GO:0002318	BP	GO:0002318	myeloid progenitor cell differentiation	1/96	10/23328	0.0404061	0.152994	0.113002	Mlf1	1
GO:0006977	BP	GO:0006977	DNA damage response, signal transduction by p53 class mediator resulting in cell cycle arrest	1/96	10/23328	0.0404061	0.152994	0.113002	Cdkn1a	1
GO:0010985	BP	GO:0010985	negative regulation of lipoprotein particle clearance	1/96	10/23328	0.0404061	0.152994	0.113002	Csk	1
GO:0015801	BP	GO:0015801	aromatic amino acid transport	1/96	10/23328	0.0404061	0.152994	0.113002	Slc38a5	1
GO:0021612	BP	GO:0021612	facial nerve structural organization	1/96	10/23328	0.0404061	0.152994	0.113002	Egr2	1
GO:0030952	BP	GO:0030952	establishment or maintenance of cytoskeleton polarity	1/96	10/23328	0.0404061	0.152994	0.113002	Lmna	1
GO:0032621	BP	GO:0032621	interleukin-18 production	1/96	10/23328	0.0404061	0.152994	0.113002	Tlr2	1
GO:0036462	BP	GO:0036462	TRAIL-activated apoptotic signaling pathway	1/96	10/23328	0.0404061	0.152994	0.113002	Atf3	1
GO:0060710	BP	GO:0060710	chorio-allantoic fusion	1/96	10/23328	0.0404061	0.152994	0.113002	Zfp36l1	1
GO:0060907	BP	GO:0060907	positive regulation of macrophage cytokine production	1/96	10/23328	0.0404061	0.152994	0.113002	Tlr2	1
GO:0061684	BP	GO:0061684	chaperone-mediated autophagy	1/96	10/23328	0.0404061	0.152994	0.113002	Bag3	1
GO:0072203	BP	GO:0072203	cell proliferation involved in metanephros development	1/96	10/23328	0.0404061	0.152994	0.113002	Egr1	1
GO:1900122	BP	GO:1900122	positive regulation of receptor binding	1/96	10/23328	0.0404061	0.152994	0.113002	Bdnf	1
GO:1901724	BP	GO:1901724	positive regulation of cell proliferation involved in kidney development	1/96	10/23328	0.0404061	0.152994	0.113002	Egr1	1
GO:1902033	BP	GO:1902033	regulation of hematopoietic stem cell proliferation	1/96	10/23328	0.0404061	0.152994	0.113002	Cxcl1	1
GO:1903748	BP	GO:1903748	negative regulation of establishment of protein localization to mitochondrion	1/96	10/23328	0.0404061	0.152994	0.113002	Bag3	1
GO:2000318	BP	GO:2000318	positive regulation of T-helper 17 type immune response	1/96	10/23328	0.0404061	0.152994	0.113002	Nfkbiz	1
GO:2000391	BP	GO:2000391	positive regulation of neutrophil extravasation	1/96	10/23328	0.0404061	0.152994	0.113002	Il1a	1
GO:0008544	BP	GO:0008544	epidermis development	4/96	313/23328	0.0404345	0.152994	0.113002	Zfp36l1/Errfi1/Il1a/Zfp36	4
GO:0046890	BP	GO:0046890	regulation of lipid biosynthetic process	3/96	184/23328	0.0404619	0.152994	0.113002	Avp/Egr1/Il1a	3
GO:0071229	BP	GO:0071229	cellular response to acid chemical	3/96	185/23328	0.0410099	0.154731	0.114285	Cebpb/Bdnf/Npas4	3
GO:0008625	BP	GO:0008625	extrinsic apoptotic signaling pathway via death domain receptors	2/96	78/23328	0.0411202	0.154731	0.114285	Bag3/Atf3	2
GO:0050810	BP	GO:0050810	regulation of steroid biosynthetic process	2/96	78/23328	0.0411202	0.154731	0.114285	Egr1/Il1a	2
GO:0032602	BP	GO:0032602	chemokine production	2/96	79/23328	0.0420776	0.157581	0.116389	Tlr2/Il1a	2
GO:0060191	BP	GO:0060191	regulation of lipase activity	2/96	79/23328	0.0420776	0.157581	0.116389	Flt1/Cd86	2
GO:0002262	BP	GO:0002262	myeloid cell homeostasis	3/96	187/23328	0.0421171	0.157581	0.116389	Zfp36l1/Zfp36/Hba-a1	3
GO:0031669	BP	GO:0031669	cellular response to nutrient levels	3/96	188/23328	0.0426764	0.157581	0.116389	Jun/Cdkn1a/Atf3	3
GO:0045766	BP	GO:0045766	positive regulation of angiogenesis	3/96	188/23328	0.0426764	0.157581	0.116389	Flt1/Ramp2/Il1a	3
GO:1900542	BP	GO:1900542	regulation of purine nucleotide metabolic process	2/96	80/23328	0.0430434	0.157581	0.116389	Cbfa2t3/Ier3	2
GO:0045765	BP	GO:0045765	regulation of angiogenesis	4/96	320/23328	0.0432607	0.157581	0.116389	Flt1/Ramp2/Adamts1/Il1a	4
GO:0006140	BP	GO:0006140	regulation of nucleotide metabolic process	2/96	81/23328	0.0440174	0.157581	0.116389	Cbfa2t3/Ier3	2
GO:0010389	BP	GO:0010389	regulation of G2/M transition of mitotic cell cycle	2/96	81/23328	0.0440174	0.157581	0.116389	Cdkn1a/Ier3	2
GO:0021675	BP	GO:0021675	nerve development	2/96	81/23328	0.0440174	0.157581	0.116389	Bdnf/Egr2	2
GO:0002118	BP	GO:0002118	aggressive behavior	1/96	11/23328	0.0443568	0.157581	0.116389	Avp	1
GO:0002664	BP	GO:0002664	regulation of T cell tolerance induction	1/96	11/23328	0.0443568	0.157581	0.116389	Cd86	1
GO:0014010	BP	GO:0014010	Schwann cell proliferation	1/96	11/23328	0.0443568	0.157581	0.116389	Pmp22	1
GO:0019227	BP	GO:0019227	neuronal action potential propagation	1/96	11/23328	0.0443568	0.157581	0.116389	Pmp22	1
GO:0031077	BP	GO:0031077	post-embryonic camera-type eye development	1/96	11/23328	0.0443568	0.157581	0.116389	Flt1	1
GO:0033084	BP	GO:0033084	regulation of immature T cell proliferation in thymus	1/96	11/23328	0.0443568	0.157581	0.116389	Il1a	1
GO:0036005	BP	GO:0036005	response to macrophage colony-stimulating factor	1/96	11/23328	0.0443568	0.157581	0.116389	Tlr2	1
GO:0036006	BP	GO:0036006	cellular response to macrophage colony-stimulating factor stimulus	1/96	11/23328	0.0443568	0.157581	0.116389	Tlr2	1
GO:0036490	BP	GO:0036490	regulation of translation in response to endoplasmic reticulum stress	1/96	11/23328	0.0443568	0.157581	0.116389	Ppp1r15a	1
GO:0038180	BP	GO:0038180	nerve growth factor signaling pathway	1/96	11/23328	0.0443568	0.157581	0.116389	Bdnf	1
GO:0042996	BP	GO:0042996	regulation of Golgi to plasma membrane protein transport	1/96	11/23328	0.0443568	0.157581	0.116389	Csk	1
GO:0045924	BP	GO:0045924	regulation of female receptivity	1/96	11/23328	0.0443568	0.157581	0.116389	Avp	1
GO:0048563	BP	GO:0048563	post-embryonic animal organ morphogenesis	1/96	11/23328	0.0443568	0.157581	0.116389	Flt1	1
GO:0051385	BP	GO:0051385	response to mineralocorticoid	1/96	11/23328	0.0443568	0.157581	0.116389	Npas4	1
GO:0051574	BP	GO:0051574	positive regulation of histone H3-K9 methylation	1/96	11/23328	0.0443568	0.157581	0.116389	Lmna	1
GO:0051657	BP	GO:0051657	maintenance of organelle location	1/96	11/23328	0.0443568	0.157581	0.116389	Uvrag	1
GO:0072431	BP	GO:0072431	signal transduction involved in mitotic G1 DNA damage checkpoint	1/96	11/23328	0.0443568	0.157581	0.116389	Cdkn1a	1
GO:0090281	BP	GO:0090281	negative regulation of calcium ion import	1/96	11/23328	0.0443568	0.157581	0.116389	Slc30a1	1
GO:0097084	BP	GO:0097084	vascular associated smooth muscle cell development	1/96	11/23328	0.0443568	0.157581	0.116389	Ramp2	1
GO:0098870	BP	GO:0098870	action potential propagation	1/96	11/23328	0.0443568	0.157581	0.116389	Pmp22	1
GO:1902400	BP	GO:1902400	intracellular signal transduction involved in G1 DNA damage checkpoint	1/96	11/23328	0.0443568	0.157581	0.116389	Cdkn1a	1
GO:2000121	BP	GO:2000121	regulation of removal of superoxide radicals	1/96	11/23328	0.0443568	0.157581	0.116389	Gch1	1
GO:2000389	BP	GO:2000389	regulation of neutrophil extravasation	1/96	11/23328	0.0443568	0.157581	0.116389	Il1a	1
GO:2001214	BP	GO:2001214	positive regulation of vasculogenesis	1/96	11/23328	0.0443568	0.157581	0.116389	Ramp2	1
GO:2001280	BP	GO:2001280	positive regulation of unsaturated fatty acid biosynthetic process	1/96	11/23328	0.0443568	0.157581	0.116389	Avp	1
GO:0007416	BP	GO:0007416	synapse assembly	3/96	191/23328	0.0443766	0.157581	0.116389	Tlr2/Bdnf/Npas4	3
GO:0051783	BP	GO:0051783	regulation of nuclear division	3/96	191/23328	0.0443766	0.157581	0.116389	Osm/Il1a/Hspa1a	3
GO:0022408	BP	GO:0022408	negative regulation of cell-cell adhesion	3/96	192/23328	0.0449508	0.159308	0.117665	Cxcl12/Cebpb/Cd86	3
GO:0032479	BP	GO:0032479	regulation of type I interferon production	2/96	82/23328	0.0449996	0.159308	0.117665	Tlr2/Cd14	2
GO:0015931	BP	GO:0015931	nucleobase-containing compound transport	3/96	193/23328	0.0455286	0.160937	0.118868	Igf2bp3/Zfp36l1/Zfp36	3
GO:2000241	BP	GO:2000241	regulation of reproductive process	3/96	195/23328	0.0466955	0.163044	0.120425	Osm/Il1a/Timp1	3
GO:0051817	BP	GO:0051817	modulation of process of other organism involved in symbiotic interaction	2/96	84/23328	0.0469883	0.163044	0.120425	Jun/Ccl4	2
GO:0061515	BP	GO:0061515	myeloid cell development	2/96	84/23328	0.0469883	0.163044	0.120425	Tlr2/Hba-a1	2
GO:0048771	BP	GO:0048771	tissue remodeling	3/96	196/23328	0.0472845	0.163044	0.120425	Csk/Il1a/Timp1	3
GO:0044706	BP	GO:0044706	multi-multicellular organism process	3/96	197/23328	0.0478772	0.163044	0.120425	Thbd/Junb/Timp1	3
GO:0002696	BP	GO:0002696	positive regulation of leukocyte activation	5/96	479/23328	0.0478863	0.163044	0.120425	Cd83/Cdkn1a/Cd86/Nfkbiz/Il1a	5
GO:0006835	BP	GO:0006835	dicarboxylic acid transport	2/96	85/23328	0.0479946	0.163044	0.120425	Avp/Bdnf	2
GO:0007218	BP	GO:0007218	neuropeptide signaling pathway	2/96	85/23328	0.0479946	0.163044	0.120425	Pmch/Gpr84	2
GO:0014910	BP	GO:0014910	regulation of smooth muscle cell migration	2/96	85/23328	0.0479946	0.163044	0.120425	Egr1/Adamts1	2
GO:0016264	BP	GO:0016264	gap junction assembly	1/96	12/23328	0.0482913	0.163044	0.120425	Gjb2	1
GO:0021561	BP	GO:0021561	facial nerve development	1/96	12/23328	0.0482913	0.163044	0.120425	Egr2	1
GO:0021610	BP	GO:0021610	facial nerve morphogenesis	1/96	12/23328	0.0482913	0.163044	0.120425	Egr2	1
GO:0031392	BP	GO:0031392	regulation of prostaglandin biosynthetic process	1/96	12/23328	0.0482913	0.163044	0.120425	Avp	1
GO:0032490	BP	GO:0032490	detection of molecule of bacterial origin	1/96	12/23328	0.0482913	0.163044	0.120425	Tlr2	1
GO:0033080	BP	GO:0033080	immature T cell proliferation in thymus	1/96	12/23328	0.0482913	0.163044	0.120425	Il1a	1
GO:0033603	BP	GO:0033603	positive regulation of dopamine secretion	1/96	12/23328	0.0482913	0.163044	0.120425	Cxcl12	1
GO:0034333	BP	GO:0034333	adherens junction assembly	1/96	12/23328	0.0482913	0.163044	0.120425	Ramp2	1
GO:0046929	BP	GO:0046929	negative regulation of neurotransmitter secretion	1/96	12/23328	0.0482913	0.163044	0.120425	Slc30a1	1
GO:0048934	BP	GO:0048934	peripheral nervous system neuron differentiation	1/96	12/23328	0.0482913	0.163044	0.120425	Pmp22	1
GO:0048935	BP	GO:0048935	peripheral nervous system neuron development	1/96	12/23328	0.0482913	0.163044	0.120425	Pmp22	1
GO:0060213	BP	GO:0060213	positive regulation of nuclear-transcribed mRNA poly(A) tail shortening	1/96	12/23328	0.0482913	0.163044	0.120425	Zfp36	1
GO:0060368	BP	GO:0060368	regulation of Fc receptor mediated stimulatory signaling pathway	1/96	12/23328	0.0482913	0.163044	0.120425	Csk	1
GO:0061744	BP	GO:0061744	motor behavior	1/96	12/23328	0.0482913	0.163044	0.120425	Pmp22	1
GO:0070943	BP	GO:0070943	neutrophil-mediated killing of symbiont cell	1/96	12/23328	0.0482913	0.163044	0.120425	Cxcl1	1
GO:0071639	BP	GO:0071639	positive regulation of monocyte chemotactic protein-1 production	1/96	12/23328	0.0482913	0.163044	0.120425	Il1a	1
GO:0072124	BP	GO:0072124	regulation of glomerular mesangial cell proliferation	1/96	12/23328	0.0482913	0.163044	0.120425	Egr1	1
GO:0090343	BP	GO:0090343	positive regulation of cell aging	1/96	12/23328	0.0482913	0.163044	0.120425	Lmna	1
GO:0097421	BP	GO:0097421	liver regeneration	1/96	12/23328	0.0482913	0.163044	0.120425	Cebpb	1
GO:0098792	BP	GO:0098792	xenophagy	1/96	12/23328	0.0482913	0.163044	0.120425	Tlr2	1
GO:1900112	BP	GO:1900112	regulation of histone H3-K9 trimethylation	1/96	12/23328	0.0482913	0.163044	0.120425	Lmna	1
GO:1902947	BP	GO:1902947	regulation of tau-protein kinase activity	1/96	12/23328	0.0482913	0.163044	0.120425	Egr1	1
GO:0030307	BP	GO:0030307	positive regulation of cell growth	3/96	198/23328	0.0484735	0.163423	0.120704	Avp/Cxcl12/Bdnf	3
GO:0046942	BP	GO:0046942	carboxylic acid transport	4/96	333/23328	0.0487989	0.164282	0.121339	Avp/Slc38a5/Bdnf/Il1a	4
GO:0032606	BP	GO:0032606	type I interferon production	2/96	86/23328	0.0490088	0.164732	0.121671	Tlr2/Cd14	2
GO:0050714	BP	GO:0050714	positive regulation of protein secretion	3/96	199/23328	0.0490735	0.164732	0.121671	Tlr2/Il1a/Cd14	3
GO:0001906	BP	GO:0001906	cell killing	3/96	200/23328	0.0496771	0.166401	0.122904	Cxcl12/Prf1/Cxcl1	3
GO:0035304	BP	GO:0035304	regulation of protein dephosphorylation	2/96	87/23328	0.0500307	0.166401	0.122904	Ppp1r15a/Rcan1	2
GO:0015849	BP	GO:0015849	organic acid transport	4/96	337/23328	0.0505785	0.166401	0.122904	Avp/Slc38a5/Bdnf/Il1a	4
GO:0042063	BP	GO:0042063	gliogenesis	4/96	338/23328	0.0510289	0.166401	0.122904	Pmp22/Tlr2/Egr2/Ccl3	4
GO:0032436	BP	GO:0032436	positive regulation of proteasomal ubiquitin-dependent protein catabolic process	2/96	88/23328	0.0510604	0.166401	0.122904	Cbfa2t3/Hspa1a	2
GO:0046683	BP	GO:0046683	response to organophosphorus	2/96	88/23328	0.0510604	0.166401	0.122904	Per1/Zfp36l1	2
GO:0050672	BP	GO:0050672	negative regulation of lymphocyte proliferation	2/96	88/23328	0.0510604	0.166401	0.122904	Cebpb/Cd86	2
GO:0060079	BP	GO:0060079	excitatory postsynaptic potential	2/96	88/23328	0.0510604	0.166401	0.122904	Bdnf/Npas4	2
GO:0032945	BP	GO:0032945	negative regulation of mononuclear cell proliferation	2/96	89/23328	0.0520976	0.166401	0.122904	Cebpb/Cd86	2
GO:0001542	BP	GO:0001542	ovulation from ovarian follicle	1/96	13/23328	0.0522098	0.166401	0.122904	Adamts1	1
GO:0001660	BP	GO:0001660	fever generation	1/96	13/23328	0.0522098	0.166401	0.122904	Il1a	1
GO:0002517	BP	GO:0002517	T cell tolerance induction	1/96	13/23328	0.0522098	0.166401	0.122904	Cd86	1
GO:0002730	BP	GO:0002730	regulation of dendritic cell cytokine production	1/96	13/23328	0.0522098	0.166401	0.122904	Tlr2	1
GO:0010739	BP	GO:0010739	positive regulation of protein kinase A signaling	1/96	13/23328	0.0522098	0.166401	0.122904	Akap12	1
GO:0010988	BP	GO:0010988	regulation of low-density lipoprotein particle clearance	1/96	13/23328	0.0522098	0.166401	0.122904	Csk	1
GO:0010998	BP	GO:0010998	regulation of translational initiation by eIF2 alpha phosphorylation	1/96	13/23328	0.0522098	0.166401	0.122904	Ppp1r15a	1
GO:0015816	BP	GO:0015816	glycine transport	1/96	13/23328	0.0522098	0.166401	0.122904	Slc38a5	1
GO:0021604	BP	GO:0021604	cranial nerve structural organization	1/96	13/23328	0.0522098	0.166401	0.122904	Egr2	1
GO:0033083	BP	GO:0033083	regulation of immature T cell proliferation	1/96	13/23328	0.0522098	0.166401	0.122904	Il1a	1
GO:0042402	BP	GO:0042402	cellular biogenic amine catabolic process	1/96	13/23328	0.0522098	0.166401	0.122904	Sat1	1
GO:0043589	BP	GO:0043589	skin morphogenesis	1/96	13/23328	0.0522098	0.166401	0.122904	Errfi1	1
GO:0045161	BP	GO:0045161	neuronal ion channel clustering	1/96	13/23328	0.0522098	0.166401	0.122904	Pmp22	1
GO:0055119	BP	GO:0055119	relaxation of cardiac muscle	1/96	13/23328	0.0522098	0.166401	0.122904	Pde4d	1
GO:0060670	BP	GO:0060670	branching involved in labyrinthine layer morphogenesis	1/96	13/23328	0.0522098	0.166401	0.122904	Socs3	1
GO:0061418	BP	GO:0061418	regulation of transcription from RNA polymerase II promoter in response to hypoxia	1/96	13/23328	0.0522098	0.166401	0.122904	Egr1	1
GO:0070831	BP	GO:0070831	basement membrane assembly	1/96	13/23328	0.0522098	0.166401	0.122904	Ramp2	1
GO:0071294	BP	GO:0071294	cellular response to zinc ion	1/96	13/23328	0.0522098	0.166401	0.122904	Mt2	1
GO:0072110	BP	GO:0072110	glomerular mesangial cell proliferation	1/96	13/23328	0.0522098	0.166401	0.122904	Egr1	1
GO:0072216	BP	GO:0072216	positive regulation of metanephros development	1/96	13/23328	0.0522098	0.166401	0.122904	Egr1	1
GO:0090193	BP	GO:0090193	positive regulation of glomerulus development	1/96	13/23328	0.0522098	0.166401	0.122904	Egr1	1
GO:0097011	BP	GO:0097011	cellular response to granulocyte macrophage colony-stimulating factor stimulus	1/96	13/23328	0.0522098	0.166401	0.122904	Zfp36	1
GO:0097577	BP	GO:0097577	sequestering of iron ion	1/96	13/23328	0.0522098	0.166401	0.122904	Lcn2	1
GO:0110154	BP	GO:0110154	RNA decapping	1/96	13/23328	0.0522098	0.166401	0.122904	Zfp36	1
GO:0110156	BP	GO:0110156	methylguanosine-cap decapping	1/96	13/23328	0.0522098	0.166401	0.122904	Zfp36	1
GO:1901163	BP	GO:1901163	regulation of trophoblast cell migration	1/96	13/23328	0.0522098	0.166401	0.122904	Timp1	1
GO:1901678	BP	GO:1901678	iron coordination entity transport	1/96	13/23328	0.0522098	0.166401	0.122904	Lcn2	1
GO:1904177	BP	GO:1904177	regulation of adipose tissue development	1/96	13/23328	0.0522098	0.166401	0.122904	Lmna	1
GO:0001649	BP	GO:0001649	osteoblast differentiation	3/96	205/23328	0.0527499	0.167599	0.123789	Lmna/Cebpb/Junb	3
GO:0016236	BP	GO:0016236	macroautophagy	3/96	205/23328	0.0527499	0.167599	0.123789	Uvrag/Bag3/Tlr2	3
GO:0019226	BP	GO:0019226	transmission of nerve impulse	2/96	90/23328	0.0531424	0.167599	0.123789	Avp/Pmp22	2
GO:0070509	BP	GO:0070509	calcium ion import	2/96	90/23328	0.0531424	0.167599	0.123789	Cxcl12/Slc30a1	2
GO:0001101	BP	GO:0001101	response to acid chemical	3/96	207/23328	0.0540042	0.167599	0.123789	Cebpb/Bdnf/Npas4	3
GO:0050867	BP	GO:0050867	positive regulation of cell activation	5/96	496/23328	0.0540884	0.167599	0.123789	Cd83/Cdkn1a/Cd86/Nfkbiz/Il1a	5
GO:0001938	BP	GO:0001938	positive regulation of endothelial cell proliferation	2/96	91/23328	0.0541947	0.167599	0.123789	Cxcl12/Jun	2
GO:0014015	BP	GO:0014015	positive regulation of gliogenesis	2/96	91/23328	0.0541947	0.167599	0.123789	Tlr2/Egr2	2
GO:0032890	BP	GO:0032890	regulation of organic acid transport	2/96	91/23328	0.0541947	0.167599	0.123789	Avp/Il1a	2
GO:0044344	BP	GO:0044344	cellular response to fibroblast growth factor stimulus	2/96	91/23328	0.0541947	0.167599	0.123789	Zfp36l1/Zfp36	2
GO:1903524	BP	GO:1903524	positive regulation of blood circulation	2/96	91/23328	0.0541947	0.167599	0.123789	Avp/Gch1	2
GO:0071560	BP	GO:0071560	cellular response to transforming growth factor beta stimulus	3/96	208/23328	0.0546368	0.167599	0.123789	Zfp36l1/Jun/Fos	3
GO:0006096	BP	GO:0006096	glycolytic process	2/96	92/23328	0.0552544	0.167599	0.123789	Cbfa2t3/Ier3	2
GO:0014909	BP	GO:0014909	smooth muscle cell migration	2/96	92/23328	0.0552544	0.167599	0.123789	Egr1/Adamts1	2
GO:0045685	BP	GO:0045685	regulation of glial cell differentiation	2/96	92/23328	0.0552544	0.167599	0.123789	Tlr2/Egr2	2
GO:0051222	BP	GO:0051222	positive regulation of protein transport	4/96	348/23328	0.055655	0.167599	0.123789	Bag3/Tlr2/Il1a/Cd14	4
GO:0002371	BP	GO:0002371	dendritic cell cytokine production	1/96	14/23328	0.0561124	0.167599	0.123789	Tlr2	1
GO:0006857	BP	GO:0006857	oligopeptide transport	1/96	14/23328	0.0561124	0.167599	0.123789	Slc15a3	1
GO:0007076	BP	GO:0007076	mitotic chromosome condensation	1/96	14/23328	0.0561124	0.167599	0.123789	Phf13	1
GO:0009310	BP	GO:0009310	amine catabolic process	1/96	14/23328	0.0561124	0.167599	0.123789	Sat1	1
GO:0010644	BP	GO:0010644	cell communication by electrical coupling	1/96	14/23328	0.0561124	0.167599	0.123789	Pde4d	1
GO:0032328	BP	GO:0032328	alanine transport	1/96	14/23328	0.0561124	0.167599	0.123789	Slc38a5	1
GO:0032494	BP	GO:0032494	response to peptidoglycan	1/96	14/23328	0.0561124	0.167599	0.123789	Tlr2	1
GO:0033079	BP	GO:0033079	immature T cell proliferation	1/96	14/23328	0.0561124	0.167599	0.123789	Il1a	1
GO:0042532	BP	GO:0042532	negative regulation of tyrosine phosphorylation of STAT protein	1/96	14/23328	0.0561124	0.167599	0.123789	Socs3	1
GO:0042559	BP	GO:0042559	pteridine-containing compound biosynthetic process	1/96	14/23328	0.0561124	0.167599	0.123789	Gch1	1
GO:0043558	BP	GO:0043558	regulation of translational initiation in response to stress	1/96	14/23328	0.0561124	0.167599	0.123789	Ppp1r15a	1
GO:0045835	BP	GO:0045835	negative regulation of meiotic nuclear division	1/96	14/23328	0.0561124	0.167599	0.123789	Osm	1
GO:0045938	BP	GO:0045938	positive regulation of circadian sleep/wake cycle, sleep	1/96	14/23328	0.0561124	0.167599	0.123789	Pmch	1
GO:0046058	BP	GO:0046058	cAMP metabolic process	1/96	14/23328	0.0561124	0.167599	0.123789	Pde4d	1
GO:0046886	BP	GO:0046886	positive regulation of hormone biosynthetic process	1/96	14/23328	0.0561124	0.167599	0.123789	Egr1	1
GO:0048672	BP	GO:0048672	positive regulation of collateral sprouting	1/96	14/23328	0.0561124	0.167599	0.123789	Bdnf	1
GO:0060180	BP	GO:0060180	female mating behavior	1/96	14/23328	0.0561124	0.167599	0.123789	Avp	1
GO:0060211	BP	GO:0060211	regulation of nuclear-transcribed mRNA poly(A) tail shortening	1/96	14/23328	0.0561124	0.167599	0.123789	Zfp36	1
GO:0061450	BP	GO:0061450	trophoblast cell migration	1/96	14/23328	0.0561124	0.167599	0.123789	Timp1	1
GO:0061469	BP	GO:0061469	regulation of type B pancreatic cell proliferation	1/96	14/23328	0.0561124	0.167599	0.123789	Errfi1	1
GO:0070942	BP	GO:0070942	neutrophil mediated cytotoxicity	1/96	14/23328	0.0561124	0.167599	0.123789	Cxcl1	1
GO:0071850	BP	GO:0071850	mitotic cell cycle arrest	1/96	14/23328	0.0561124	0.167599	0.123789	Cdkn1a	1
GO:0072224	BP	GO:0072224	metanephric glomerulus development	1/96	14/23328	0.0561124	0.167599	0.123789	Egr1	1
GO:0072413	BP	GO:0072413	signal transduction involved in mitotic cell cycle checkpoint	1/96	14/23328	0.0561124	0.167599	0.123789	Cdkn1a	1
GO:0097012	BP	GO:0097012	response to granulocyte macrophage colony-stimulating factor	1/96	14/23328	0.0561124	0.167599	0.123789	Zfp36	1
GO:0099550	BP	GO:0099550	trans-synaptic signaling, modulating synaptic transmission	1/96	14/23328	0.0561124	0.167599	0.123789	Bdnf	1
GO:1902402	BP	GO:1902402	signal transduction involved in mitotic DNA damage checkpoint	1/96	14/23328	0.0561124	0.167599	0.123789	Cdkn1a	1
GO:1902403	BP	GO:1902403	signal transduction involved in mitotic DNA integrity checkpoint	1/96	14/23328	0.0561124	0.167599	0.123789	Cdkn1a	1
GO:1903236	BP	GO:1903236	regulation of leukocyte tethering or rolling	1/96	14/23328	0.0561124	0.167599	0.123789	Cxcl12	1
GO:2000018	BP	GO:2000018	regulation of male gonad development	1/96	14/23328	0.0561124	0.167599	0.123789	Il1a	1
GO:2001279	BP	GO:2001279	regulation of unsaturated fatty acid biosynthetic process	1/96	14/23328	0.0561124	0.167599	0.123789	Avp	1
GO:0042060	BP	GO:0042060	wound healing	4/96	349/23328	0.0561297	0.167599	0.123789	Thbd/Cdkn1a/Il1a/Timp1	4
GO:0002028	BP	GO:0002028	regulation of sodium ion transport	2/96	93/23328	0.0563213	0.167599	0.123789	Per1/Cxcl1	2
GO:0006757	BP	GO:0006757	ATP generation from ADP	2/96	93/23328	0.0563213	0.167599	0.123789	Cbfa2t3/Ier3	2
GO:0033077	BP	GO:0033077	T cell differentiation in thymus	2/96	93/23328	0.0563213	0.167599	0.123789	Zfp36l1/Il1a	2
GO:0071774	BP	GO:0071774	response to fibroblast growth factor	2/96	93/23328	0.0563213	0.167599	0.123789	Zfp36l1/Zfp36	2
GO:0042180	BP	GO:0042180	cellular ketone metabolic process	3/96	211/23328	0.0565558	0.168083	0.124146	Avp/Coq10b/Egr1	3
GO:0071559	BP	GO:0071559	response to transforming growth factor beta	3/96	212/23328	0.0572026	0.169788	0.125406	Zfp36l1/Jun/Fos	3
GO:0070664	BP	GO:0070664	negative regulation of leukocyte proliferation	2/96	94/23328	0.0573955	0.169929	0.12551	Cebpb/Cd86	2
GO:1903313	BP	GO:1903313	positive regulation of mRNA metabolic process	2/96	94/23328	0.0573955	0.169929	0.12551	Zfp36l1/Zfp36	2
GO:0051651	BP	GO:0051651	maintenance of location in cell	3/96	213/23328	0.057853	0.170705	0.126083	Pde4d/Uvrag/Lcn2	3
GO:0031343	BP	GO:0031343	positive regulation of cell killing	2/96	95/23328	0.0584769	0.170705	0.126083	Prf1/Cxcl1	2
GO:0051341	BP	GO:0051341	regulation of oxidoreductase activity	2/96	95/23328	0.0584769	0.170705	0.126083	Gch1/Il1a	2
GO:0055013	BP	GO:0055013	cardiac muscle cell development	2/96	95/23328	0.0584769	0.170705	0.126083	Mef2a/Lmna	2
GO:0019722	BP	GO:0019722	calcium-mediated signaling	3/96	214/23328	0.0585068	0.170705	0.126083	Pde4d/Rcan1/Ccl4	3
GO:0006163	BP	GO:0006163	purine nucleotide metabolic process	4/96	354/23328	0.0585363	0.170705	0.126083	Oasl2/Cbfa2t3/Pde4d/Ier3	4
GO:0007249	BP	GO:0007249	I-kappaB kinase/NF-kappaB signaling	3/96	215/23328	0.0591642	0.170705	0.126083	Per1/Tlr2/Il1a	3
GO:0002690	BP	GO:0002690	positive regulation of leukocyte chemotaxis	2/96	96/23328	0.0595654	0.170705	0.126083	Cxcl12/Ccl4	2
GO:0045638	BP	GO:0045638	negative regulation of myeloid cell differentiation	2/96	96/23328	0.0595654	0.170705	0.126083	Zfp36l1/Zfp36	2
GO:1903578	BP	GO:1903578	regulation of ATP metabolic process	2/96	96/23328	0.0595654	0.170705	0.126083	Cbfa2t3/Ier3	2
GO:0001771	BP	GO:0001771	immunological synapse formation	1/96	15/23328	0.059999	0.170705	0.126083	Prf1	1
GO:0002862	BP	GO:0002862	negative regulation of inflammatory response to antigenic stimulus	1/96	15/23328	0.059999	0.170705	0.126083	Gpr17	1
GO:0006978	BP	GO:0006978	DNA damage response, signal transduction by p53 class mediator resulting in transcription of p21 class mediator	1/96	15/23328	0.059999	0.170705	0.126083	Cdkn1a	1
GO:0010935	BP	GO:0010935	regulation of macrophage cytokine production	1/96	15/23328	0.059999	0.170705	0.126083	Tlr2	1
GO:0014049	BP	GO:0014049	positive regulation of glutamate secretion	1/96	15/23328	0.059999	0.170705	0.126083	Avp	1
GO:0016553	BP	GO:0016553	base conversion or substitution editing	1/96	15/23328	0.059999	0.170705	0.126083	Rbm47	1
GO:0023035	BP	GO:0023035	CD40 signaling pathway	1/96	15/23328	0.059999	0.170705	0.126083	Cd86	1
GO:0031987	BP	GO:0031987	locomotion involved in locomotory behavior	1/96	15/23328	0.059999	0.170705	0.126083	Rcan1	1
GO:0032308	BP	GO:0032308	positive regulation of prostaglandin secretion	1/96	15/23328	0.059999	0.170705	0.126083	Il1a	1
GO:0042416	BP	GO:0042416	dopamine biosynthetic process	1/96	15/23328	0.059999	0.170705	0.126083	Gch1	1
GO:0042428	BP	GO:0042428	serotonin metabolic process	1/96	15/23328	0.059999	0.170705	0.126083	Gch1	1
GO:0048096	BP	GO:0048096	chromatin-mediated maintenance of transcription	1/96	15/23328	0.059999	0.170705	0.126083	Sertad1	1
GO:0050930	BP	GO:0050930	induction of positive chemotaxis	1/96	15/23328	0.059999	0.170705	0.126083	Cxcl12	1
GO:0051645	BP	GO:0051645	Golgi localization	1/96	15/23328	0.059999	0.170705	0.126083	Uvrag	1
GO:0060347	BP	GO:0060347	heart trabecula formation	1/96	15/23328	0.059999	0.170705	0.126083	Adamts1	1
GO:0060700	BP	GO:0060700	regulation of ribonuclease activity	1/96	15/23328	0.059999	0.170705	0.126083	Oasl2	1
GO:0061029	BP	GO:0061029	eyelid development in camera-type eye	1/96	15/23328	0.059999	0.170705	0.126083	Jun	1
GO:0070932	BP	GO:0070932	histone H3 deacetylation	1/96	15/23328	0.059999	0.170705	0.126083	Per1	1
GO:0071280	BP	GO:0071280	cellular response to copper ion	1/96	15/23328	0.059999	0.170705	0.126083	Mt2	1
GO:0098917	BP	GO:0098917	retrograde trans-synaptic signaling	1/96	15/23328	0.059999	0.170705	0.126083	Bdnf	1
GO:1902043	BP	GO:1902043	positive regulation of extrinsic apoptotic signaling pathway via death domain receptors	1/96	15/23328	0.059999	0.170705	0.126083	Atf3	1
GO:1904862	BP	GO:1904862	inhibitory synapse assembly	1/96	15/23328	0.059999	0.170705	0.126083	Npas4	1
GO:0017038	BP	GO:0017038	protein import	3/96	217/23328	0.0604894	0.171505	0.126674	Lmna/Bag3/Cdkn1a	3
GO:0045787	BP	GO:0045787	positive regulation of cell cycle	4/96	358/23328	0.0605011	0.171505	0.126674	Rassf1/Cdkn1a/Adamts1/Il1a	4
GO:0062012	BP	GO:0062012	regulation of small molecule metabolic process	4/96	358/23328	0.0605011	0.171505	0.126674	Avp/Cbfa2t3/Egr1/Ier3	4
GO:1902749	BP	GO:1902749	regulation of cell cycle G2/M phase transition	2/96	97/23328	0.0606608	0.17175	0.126855	Cdkn1a/Ier3	2
GO:0060395	BP	GO:0060395	SMAD protein signal transduction	2/96	98/23328	0.0617632	0.17429	0.128731	Jun/Fos	2
GO:0099565	BP	GO:0099565	chemical synaptic transmission, postsynaptic	2/96	98/23328	0.0617632	0.17429	0.128731	Bdnf/Npas4	2
GO:0014066	BP	GO:0014066	regulation of phosphatidylinositol 3-kinase signaling	2/96	99/23328	0.0628724	0.17429	0.128731	Flt1/Osm	2
GO:0046031	BP	GO:0046031	ADP metabolic process	2/96	99/23328	0.0628724	0.17429	0.128731	Cbfa2t3/Ier3	2
GO:0062014	BP	GO:0062014	negative regulation of small molecule metabolic process	2/96	99/23328	0.0628724	0.17429	0.128731	Cbfa2t3/Ier3	2
GO:0019216	BP	GO:0019216	regulation of lipid metabolic process	4/96	363/23328	0.063006	0.17429	0.128731	Avp/Flt1/Egr1/Il1a	4
GO:0018205	BP	GO:0018205	peptidyl-lysine modification	4/96	364/23328	0.0635136	0.17429	0.128731	Per1/Lmna/Egr1/Egr2	4
GO:1904951	BP	GO:1904951	positive regulation of establishment of protein localization	4/96	364/23328	0.0635136	0.17429	0.128731	Bag3/Tlr2/Il1a/Cd14	4
GO:0043547	BP	GO:0043547	positive regulation of GTPase activity	3/96	222/23328	0.0638631	0.17429	0.128731	Ccl7/Ccl3/Ccl4	3
GO:0045732	BP	GO:0045732	positive regulation of protein catabolic process	3/96	222/23328	0.0638631	0.17429	0.128731	Cbfa2t3/Ier3/Hspa1a	3
GO:0061138	BP	GO:0061138	morphogenesis of a branching epithelium	3/96	222/23328	0.0638631	0.17429	0.128731	Cxcl12/Flt1/Socs3	3
GO:0010224	BP	GO:0010224	response to UV-B	1/96	16/23328	0.0638698	0.17429	0.128731	Cdkn1a	1
GO:0033089	BP	GO:0033089	positive regulation of T cell differentiation in thymus	1/96	16/23328	0.0638698	0.17429	0.128731	Il1a	1
GO:0034134	BP	GO:0034134	toll-like receptor 2 signaling pathway	1/96	16/23328	0.0638698	0.17429	0.128731	Tlr2	1
GO:0042772	BP	GO:0042772	DNA damage response, signal transduction resulting in transcription	1/96	16/23328	0.0638698	0.17429	0.128731	Cdkn1a	1
GO:0043084	BP	GO:0043084	penile erection	1/96	16/23328	0.0638698	0.17429	0.128731	Avp	1
GO:0043923	BP	GO:0043923	positive regulation by host of viral transcription	1/96	16/23328	0.0638698	0.17429	0.128731	Jun	1
GO:0051382	BP	GO:0051382	kinetochore assembly	1/96	16/23328	0.0638698	0.17429	0.128731	Cenpa	1
GO:0060314	BP	GO:0060314	regulation of ryanodine-sensitive calcium-release channel activity	1/96	16/23328	0.0638698	0.17429	0.128731	Pde4d	1
GO:0070885	BP	GO:0070885	negative regulation of calcineurin-NFAT signaling cascade	1/96	16/23328	0.0638698	0.17429	0.128731	Rcan1	1
GO:0072109	BP	GO:0072109	glomerular mesangium development	1/96	16/23328	0.0638698	0.17429	0.128731	Egr1	1
GO:0090083	BP	GO:0090083	regulation of inclusion body assembly	1/96	16/23328	0.0638698	0.17429	0.128731	Dnajb1	1
GO:0106057	BP	GO:0106057	negative regulation of calcineurin-mediated signaling	1/96	16/23328	0.0638698	0.17429	0.128731	Rcan1	1
GO:1901077	BP	GO:1901077	regulation of relaxation of muscle	1/96	16/23328	0.0638698	0.17429	0.128731	Pde4d	1
GO:1901722	BP	GO:1901722	regulation of cell proliferation involved in kidney development	1/96	16/23328	0.0638698	0.17429	0.128731	Egr1	1
GO:1903779	BP	GO:1903779	regulation of cardiac conduction	1/96	16/23328	0.0638698	0.17429	0.128731	Pde4d	1
GO:1905048	BP	GO:1905048	regulation of metallopeptidase activity	1/96	16/23328	0.0638698	0.17429	0.128731	Timp1	1
GO:2000647	BP	GO:2000647	negative regulation of stem cell proliferation	1/96	16/23328	0.0638698	0.17429	0.128731	Bdnf	1
GO:2001212	BP	GO:2001212	regulation of vasculogenesis	1/96	16/23328	0.0638698	0.17429	0.128731	Ramp2	1
GO:0042102	BP	GO:0042102	positive regulation of T cell proliferation	2/96	100/23328	0.0639885	0.17429	0.128731	Cd86/Il1a	2
GO:0042116	BP	GO:0042116	macrophage activation	2/96	100/23328	0.0639885	0.17429	0.128731	Jun/Tlr2	2
GO:0046889	BP	GO:0046889	positive regulation of lipid biosynthetic process	2/96	100/23328	0.0639885	0.17429	0.128731	Avp/Il1a	2
GO:0048167	BP	GO:0048167	regulation of synaptic plasticity	4/96	365/23328	0.0640232	0.17429	0.128731	Pmch/Egr1/Bdnf/Npas4	4
GO:0032092	BP	GO:0032092	positive regulation of protein binding	2/96	101/23328	0.0651112	0.176223	0.130159	Ramp2/Bdnf	2
GO:0032755	BP	GO:0032755	positive regulation of interleukin-6 production	2/96	101/23328	0.0651112	0.176223	0.130159	Tlr2/Il1a	2
GO:0055006	BP	GO:0055006	cardiac cell development	2/96	101/23328	0.0651112	0.176223	0.130159	Mef2a/Lmna	2
GO:0071456	BP	GO:0071456	cellular response to hypoxia	2/96	101/23328	0.0651112	0.176223	0.130159	Zfp36l1/Egr1	2
GO:2000060	BP	GO:2000060	positive regulation of ubiquitin-dependent protein catabolic process	2/96	101/23328	0.0651112	0.176223	0.130159	Cbfa2t3/Hspa1a	2
GO:0050920	BP	GO:0050920	regulation of chemotaxis	3/96	224/23328	0.0652367	0.176358	0.130259	Cxcl12/Dusp1/Ccl4	3
GO:0007173	BP	GO:0007173	epidermal growth factor receptor signaling pathway	2/96	103/23328	0.0673765	0.178938	0.132164	Errfi1/Gprc5a	2
GO:0050772	BP	GO:0050772	positive regulation of axonogenesis	2/96	103/23328	0.0673765	0.178938	0.132164	Cxcl12/Bdnf	2
GO:0002431	BP	GO:0002431	Fc receptor mediated stimulatory signaling pathway	1/96	17/23328	0.0677249	0.178938	0.132164	Csk	1
GO:0002689	BP	GO:0002689	negative regulation of leukocyte chemotaxis	1/96	17/23328	0.0677249	0.178938	0.132164	Dusp1	1
GO:0010713	BP	GO:0010713	negative regulation of collagen metabolic process	1/96	17/23328	0.0677249	0.178938	0.132164	Errfi1	1
GO:0010934	BP	GO:0010934	macrophage cytokine production	1/96	17/23328	0.0677249	0.178938	0.132164	Tlr2	1
GO:0032225	BP	GO:0032225	regulation of synaptic transmission, dopaminergic	1/96	17/23328	0.0677249	0.178938	0.132164	Pmch	1
GO:0032306	BP	GO:0032306	regulation of prostaglandin secretion	1/96	17/23328	0.0677249	0.178938	0.132164	Il1a	1
GO:0032516	BP	GO:0032516	positive regulation of phosphoprotein phosphatase activity	1/96	17/23328	0.0677249	0.178938	0.132164	Ppp1r15a	1
GO:0032966	BP	GO:0032966	negative regulation of collagen biosynthetic process	1/96	17/23328	0.0677249	0.178938	0.132164	Errfi1	1
GO:0036124	BP	GO:0036124	histone H3-K9 trimethylation	1/96	17/23328	0.0677249	0.178938	0.132164	Lmna	1
GO:0042756	BP	GO:0042756	drinking behavior	1/96	17/23328	0.0677249	0.178938	0.132164	Pmch	1
GO:0051589	BP	GO:0051589	negative regulation of neurotransmitter transport	1/96	17/23328	0.0677249	0.178938	0.132164	Slc30a1	1
GO:0060644	BP	GO:0060644	mammary gland epithelial cell differentiation	1/96	17/23328	0.0677249	0.178938	0.132164	Cebpb	1
GO:0060850	BP	GO:0060850	regulation of transcription involved in cell fate commitment	1/96	17/23328	0.0677249	0.178938	0.132164	Cebpb	1
GO:0072672	BP	GO:0072672	neutrophil extravasation	1/96	17/23328	0.0677249	0.178938	0.132164	Il1a	1
GO:0090192	BP	GO:0090192	regulation of glomerulus development	1/96	17/23328	0.0677249	0.178938	0.132164	Egr1	1
GO:0140131	BP	GO:0140131	positive regulation of lymphocyte chemotaxis	1/96	17/23328	0.0677249	0.178938	0.132164	Ccl4	1
GO:1901160	BP	GO:1901160	primary amino compound metabolic process	1/96	17/23328	0.0677249	0.178938	0.132164	Gch1	1
GO:2001044	BP	GO:2001044	regulation of integrin-mediated signaling pathway	1/96	17/23328	0.0677249	0.178938	0.132164	Timp1	1
GO:0009135	BP	GO:0009135	purine nucleoside diphosphate metabolic process	2/96	104/23328	0.068519	0.180017	0.132961	Cbfa2t3/Ier3	2
GO:0009179	BP	GO:0009179	purine ribonucleoside diphosphate metabolic process	2/96	104/23328	0.068519	0.180017	0.132961	Cbfa2t3/Ier3	2
GO:0014074	BP	GO:0014074	response to purine-containing compound	2/96	104/23328	0.068519	0.180017	0.132961	Per1/Zfp36l1	2
GO:0043488	BP	GO:0043488	regulation of mRNA stability	2/96	104/23328	0.068519	0.180017	0.132961	Zfp36l1/Zfp36	2
GO:0045778	BP	GO:0045778	positive regulation of ossification	2/96	104/23328	0.068519	0.180017	0.132961	Lmna/Cebpb	2
GO:0016311	BP	GO:0016311	dephosphorylation	4/96	374/23328	0.0687075	0.180309	0.133176	Dusp6/Dusp1/Ppp1r15a/Rcan1	4
GO:0002793	BP	GO:0002793	positive regulation of peptide secretion	3/96	230/23328	0.0694389	0.182023	0.134443	Tlr2/Il1a/Cd14	3
GO:0000077	BP	GO:0000077	DNA damage checkpoint	2/96	105/23328	0.0696678	0.182214	0.134584	Cdkn1a/Ier3	2
GO:0046634	BP	GO:0046634	regulation of alpha-beta T cell activation	2/96	105/23328	0.0696678	0.182214	0.134584	Cd83/Nfkbiz	2
GO:0044772	BP	GO:0044772	mitotic cell cycle phase transition	4/96	376/23328	0.069772	0.182282	0.134634	Zfp36l1/Cdkn1a/Ier3/Adamts1	4
GO:0043393	BP	GO:0043393	regulation of protein binding	3/96	231/23328	0.070151	0.182469	0.134772	Ramp2/Cdkn1a/Bdnf	3
GO:0000041	BP	GO:0000041	transition metal ion transport	2/96	106/23328	0.070823	0.182469	0.134772	Slc30a1/Lcn2	2
GO:0006165	BP	GO:0006165	nucleoside diphosphate phosphorylation	2/96	106/23328	0.070823	0.182469	0.134772	Cbfa2t3/Ier3	2
GO:0014812	BP	GO:0014812	muscle cell migration	2/96	106/23328	0.070823	0.182469	0.134772	Egr1/Adamts1	2
GO:0051052	BP	GO:0051052	regulation of DNA metabolic process	4/96	379/23328	0.0713849	0.182469	0.134772	Lmna/Dusp1/Cdkn1a/Ier3	4
GO:0006595	BP	GO:0006595	polyamine metabolic process	1/96	18/23328	0.0715642	0.182469	0.134772	Sat1	1
GO:0006700	BP	GO:0006700	C21-steroid hormone biosynthetic process	1/96	18/23328	0.0715642	0.182469	0.134772	Egr1	1
GO:0006744	BP	GO:0006744	ubiquinone biosynthetic process	1/96	18/23328	0.0715642	0.182469	0.134772	Coq10b	1
GO:0009886	BP	GO:0009886	post-embryonic animal morphogenesis	1/96	18/23328	0.0715642	0.182469	0.134772	Flt1	1
GO:0010832	BP	GO:0010832	negative regulation of myotube differentiation	1/96	18/23328	0.0715642	0.182469	0.134772	Bdnf	1
GO:0021783	BP	GO:0021783	preganglionic parasympathetic fiber development	1/96	18/23328	0.0715642	0.182469	0.134772	Egr2	1
GO:0031571	BP	GO:0031571	mitotic G1 DNA damage checkpoint	1/96	18/23328	0.0715642	0.182469	0.134772	Cdkn1a	1
GO:0032740	BP	GO:0032740	positive regulation of interleukin-17 production	1/96	18/23328	0.0715642	0.182469	0.134772	Osm	1
GO:0042026	BP	GO:0042026	protein refolding	1/96	18/23328	0.0715642	0.182469	0.134772	Hspa1a	1
GO:0042448	BP	GO:0042448	progesterone metabolic process	1/96	18/23328	0.0715642	0.182469	0.134772	Egr1	1
GO:0042711	BP	GO:0042711	maternal behavior	1/96	18/23328	0.0715642	0.182469	0.134772	Avp	1
GO:0045779	BP	GO:0045779	negative regulation of bone resorption	1/96	18/23328	0.0715642	0.182469	0.134772	Csk	1
GO:0051000	BP	GO:0051000	positive regulation of nitric-oxide synthase activity	1/96	18/23328	0.0715642	0.182469	0.134772	Gch1	1
GO:1901663	BP	GO:1901663	quinone biosynthetic process	1/96	18/23328	0.0715642	0.182469	0.134772	Coq10b	1
GO:1901673	BP	GO:1901673	regulation of mitotic spindle assembly	1/96	18/23328	0.0715642	0.182469	0.134772	Hspa1a	1
GO:1904706	BP	GO:1904706	negative regulation of vascular associated smooth muscle cell proliferation	1/96	18/23328	0.0715642	0.182469	0.134772	Cdkn1a	1
GO:2000319	BP	GO:2000319	regulation of T-helper 17 cell differentiation	1/96	18/23328	0.0715642	0.182469	0.134772	Nfkbiz	1
GO:0030518	BP	GO:0030518	intracellular steroid hormone receptor signaling pathway	2/96	107/23328	0.0719845	0.183141	0.135268	Per1/Bdnf	2
GO:0048145	BP	GO:0048145	regulation of fibroblast proliferation	2/96	107/23328	0.0719845	0.183141	0.135268	Jun/Cdkn1a	2
GO:0000956	BP	GO:0000956	nuclear-transcribed mRNA catabolic process	2/96	108/23328	0.0731522	0.185427	0.136957	Zfp36l1/Zfp36	2
GO:0009185	BP	GO:0009185	ribonucleoside diphosphate metabolic process	2/96	108/23328	0.0731522	0.185427	0.136957	Cbfa2t3/Ier3	2
GO:0046939	BP	GO:0046939	nucleotide phosphorylation	2/96	108/23328	0.0731522	0.185427	0.136957	Cbfa2t3/Ier3	2
GO:0008406	BP	GO:0008406	gonad development	3/96	236/23328	0.0737612	0.185427	0.136957	Cebpb/Adamts1/Il1a	3
GO:0045930	BP	GO:0045930	negative regulation of mitotic cell cycle	3/96	236/23328	0.0737612	0.185427	0.136957	Zfp36l1/Cdkn1a/Ier3	3
GO:0048144	BP	GO:0048144	fibroblast proliferation	2/96	109/23328	0.0743261	0.185427	0.136957	Jun/Cdkn1a	2
GO:1901800	BP	GO:1901800	positive regulation of proteasomal protein catabolic process	2/96	109/23328	0.0743261	0.185427	0.136957	Cbfa2t3/Hspa1a	2
GO:0002544	BP	GO:0002544	chronic inflammatory response	1/96	19/23328	0.0753879	0.185427	0.136957	Cebpb	1
GO:0002643	BP	GO:0002643	regulation of tolerance induction	1/96	19/23328	0.0753879	0.185427	0.136957	Cd86	1
GO:0007252	BP	GO:0007252	I-kappaB phosphorylation	1/96	19/23328	0.0753879	0.185427	0.136957	Tlr2	1
GO:0010566	BP	GO:0010566	regulation of ketone biosynthetic process	1/96	19/23328	0.0753879	0.185427	0.136957	Egr1	1
GO:0010880	BP	GO:0010880	regulation of release of sequestered calcium ion into cytosol by sarcoplasmic reticulum	1/96	19/23328	0.0753879	0.185427	0.136957	Pde4d	1
GO:0016045	BP	GO:0016045	detection of bacterium	1/96	19/23328	0.0753879	0.185427	0.136957	Tlr2	1
GO:0032352	BP	GO:0032352	positive regulation of hormone metabolic process	1/96	19/23328	0.0753879	0.185427	0.136957	Egr1	1
GO:0032700	BP	GO:0032700	negative regulation of interleukin-17 production	1/96	19/23328	0.0753879	0.185427	0.136957	Tlr2	1
GO:0033145	BP	GO:0033145	positive regulation of intracellular steroid hormone receptor signaling pathway	1/96	19/23328	0.0753879	0.185427	0.136957	Bdnf	1
GO:0034138	BP	GO:0034138	toll-like receptor 3 signaling pathway	1/96	19/23328	0.0753879	0.185427	0.136957	Cd86	1
GO:0044783	BP	GO:0044783	G1 DNA damage checkpoint	1/96	19/23328	0.0753879	0.185427	0.136957	Cdkn1a	1
GO:0046827	BP	GO:0046827	positive regulation of protein export from nucleus	1/96	19/23328	0.0753879	0.185427	0.136957	Bag3	1
GO:0048311	BP	GO:0048311	mitochondrion distribution	1/96	19/23328	0.0753879	0.185427	0.136957	Mef2a	1
GO:0050884	BP	GO:0050884	neuromuscular process controlling posture	1/96	19/23328	0.0753879	0.185427	0.136957	Gch1	1
GO:0051238	BP	GO:0051238	sequestering of metal ion	1/96	19/23328	0.0753879	0.185427	0.136957	Lcn2	1
GO:0055003	BP	GO:0055003	cardiac myofibril assembly	1/96	19/23328	0.0753879	0.185427	0.136957	Mef2a	1
GO:0060033	BP	GO:0060033	anatomical structure regression	1/96	19/23328	0.0753879	0.185427	0.136957	Flt1	1
GO:0060707	BP	GO:0060707	trophoblast giant cell differentiation	1/96	19/23328	0.0753879	0.185427	0.136957	Socs3	1
GO:0060746	BP	GO:0060746	parental behavior	1/96	19/23328	0.0753879	0.185427	0.136957	Avp	1
GO:0061081	BP	GO:0061081	positive regulation of myeloid leukocyte cytokine production involved in immune response	1/96	19/23328	0.0753879	0.185427	0.136957	Tlr2	1
GO:0071605	BP	GO:0071605	monocyte chemotactic protein-1 production	1/96	19/23328	0.0753879	0.185427	0.136957	Il1a	1
GO:0071637	BP	GO:0071637	regulation of monocyte chemotactic protein-1 production	1/96	19/23328	0.0753879	0.185427	0.136957	Il1a	1
GO:0098962	BP	GO:0098962	regulation of postsynaptic neurotransmitter receptor activity	1/96	19/23328	0.0753879	0.185427	0.136957	Nptx2	1
GO:1904754	BP	GO:1904754	positive regulation of vascular associated smooth muscle cell migration	1/96	19/23328	0.0753879	0.185427	0.136957	Adamts1	1
GO:0002526	BP	GO:0002526	acute inflammatory response	2/96	110/23328	0.075506	0.185427	0.136957	Il1a/Cxcl1	2
GO:0008344	BP	GO:0008344	adult locomotory behavior	2/96	110/23328	0.075506	0.185427	0.136957	Cxcl12/Pmp22	2
GO:0051607	BP	GO:0051607	defense response to virus	3/96	239/23328	0.0759666	0.186362	0.137647	Oasl2/Prf1/Cd86	3
GO:0016241	BP	GO:0016241	regulation of macroautophagy	2/96	111/23328	0.0766919	0.187589	0.138554	Bag3/Tlr2	2
GO:0019218	BP	GO:0019218	regulation of steroid metabolic process	2/96	111/23328	0.0766919	0.187589	0.138554	Egr1/Il1a	2
GO:0045137	BP	GO:0045137	development of primary sexual characteristics	3/96	240/23328	0.0767082	0.187589	0.138554	Cebpb/Adamts1/Il1a	3
GO:0001763	BP	GO:0001763	morphogenesis of a branching structure	3/96	241/23328	0.0774531	0.18892	0.139537	Cxcl12/Flt1/Socs3	3
GO:0030278	BP	GO:0030278	regulation of ossification	3/96	241/23328	0.0774531	0.18892	0.139537	Lmna/Cebpb/Egr2	3
GO:0038127	BP	GO:0038127	ERBB signaling pathway	2/96	112/23328	0.0778838	0.18892	0.139537	Errfi1/Gprc5a	2
GO:0032147	BP	GO:0032147	activation of protein kinase activity	3/96	242/23328	0.0782011	0.18892	0.139537	Cd86/Gadd45g/Gadd45b	3
GO:0030516	BP	GO:0030516	regulation of axon extension	2/96	113/23328	0.0790815	0.18892	0.139537	Cxcl12/Bdnf	2
GO:0031570	BP	GO:0031570	DNA integrity checkpoint	2/96	113/23328	0.0790815	0.18892	0.139537	Cdkn1a/Ier3	2
GO:0050764	BP	GO:0050764	regulation of phagocytosis	2/96	113/23328	0.0790815	0.18892	0.139537	Csk/Tlr2	2
GO:0006743	BP	GO:0006743	ubiquinone metabolic process	1/96	20/23328	0.0791959	0.18892	0.139537	Coq10b	1
GO:0010763	BP	GO:0010763	positive regulation of fibroblast migration	1/96	20/23328	0.0791959	0.18892	0.139537	Akap12	1
GO:0010818	BP	GO:0010818	T cell chemotaxis	1/96	20/23328	0.0791959	0.18892	0.139537	Cxcl12	1
GO:0010984	BP	GO:0010984	regulation of lipoprotein particle clearance	1/96	20/23328	0.0791959	0.18892	0.139537	Csk	1
GO:0032310	BP	GO:0032310	prostaglandin secretion	1/96	20/23328	0.0791959	0.18892	0.139537	Il1a	1
GO:0032695	BP	GO:0032695	negative regulation of interleukin-12 production	1/96	20/23328	0.0791959	0.18892	0.139537	Tlr2	1
GO:0043555	BP	GO:0043555	regulation of translation in response to stress	1/96	20/23328	0.0791959	0.18892	0.139537	Ppp1r15a	1
GO:0044819	BP	GO:0044819	mitotic G1/S transition checkpoint	1/96	20/23328	0.0791959	0.18892	0.139537	Cdkn1a	1
GO:0046653	BP	GO:0046653	tetrahydrofolate metabolic process	1/96	20/23328	0.0791959	0.18892	0.139537	Gch1	1
GO:0046851	BP	GO:0046851	negative regulation of bone remodeling	1/96	20/23328	0.0791959	0.18892	0.139537	Csk	1
GO:0048172	BP	GO:0048172	regulation of short-term neuronal synaptic plasticity	1/96	20/23328	0.0791959	0.18892	0.139537	Bdnf	1
GO:0050965	BP	GO:0050965	detection of temperature stimulus involved in sensory perception of pain	1/96	20/23328	0.0791959	0.18892	0.139537	Cxcl12	1
GO:0051447	BP	GO:0051447	negative regulation of meiotic cell cycle	1/96	20/23328	0.0791959	0.18892	0.139537	Osm	1
GO:0070935	BP	GO:0070935	3'-UTR-mediated mRNA stabilization	1/96	20/23328	0.0791959	0.18892	0.139537	Zfp36	1
GO:0071157	BP	GO:0071157	negative regulation of cell cycle arrest	1/96	20/23328	0.0791959	0.18892	0.139537	Rassf1	1
GO:1901028	BP	GO:1901028	regulation of mitochondrial outer membrane permeabilization involved in apoptotic signaling pathway	1/96	20/23328	0.0791959	0.18892	0.139537	Ier3	1
GO:1903214	BP	GO:1903214	regulation of protein targeting to mitochondrion	1/96	20/23328	0.0791959	0.18892	0.139537	Bag3	1
GO:0001503	BP	GO:0001503	ossification	4/96	394/23328	0.0797342	0.19001	0.140342	Lmna/Cebpb/Junb/Egr2	4
GO:0043401	BP	GO:0043401	steroid hormone mediated signaling pathway	2/96	114/23328	0.080285	0.190792	0.140919	Per1/Bdnf	2
GO:0060078	BP	GO:0060078	regulation of postsynaptic membrane potential	2/96	114/23328	0.080285	0.190792	0.140919	Bdnf/Npas4	2
GO:0042176	BP	GO:0042176	regulation of protein catabolic process	4/96	395/23328	0.0803076	0.190792	0.140919	Cbfa2t3/Ier3/Timp1/Hspa1a	4
GO:0072521	BP	GO:0072521	purine-containing compound metabolic process	4/96	396/23328	0.080883	0.191885	0.141727	Oasl2/Cbfa2t3/Pde4d/Ier3	4
GO:0008585	BP	GO:0008585	female gonad development	2/96	115/23328	0.0814943	0.191885	0.141727	Cebpb/Adamts1	2
GO:0043487	BP	GO:0043487	regulation of RNA stability	2/96	116/23328	0.0827092	0.191885	0.141727	Zfp36l1/Zfp36	2
GO:0051952	BP	GO:0051952	regulation of amine transport	2/96	116/23328	0.0827092	0.191885	0.141727	Avp/Cxcl12	2
GO:2000045	BP	GO:2000045	regulation of G1/S transition of mitotic cell cycle	2/96	116/23328	0.0827092	0.191885	0.141727	Cdkn1a/Adamts1	2
GO:0007202	BP	GO:0007202	activation of phospholipase C activity	1/96	21/23328	0.0829885	0.191885	0.141727	Cd86	1
GO:0007625	BP	GO:0007625	grooming behavior	1/96	21/23328	0.0829885	0.191885	0.141727	Avp	1
GO:0014808	BP	GO:0014808	release of sequestered calcium ion into cytosol by sarcoplasmic reticulum	1/96	21/23328	0.0829885	0.191885	0.141727	Pde4d	1
GO:0019430	BP	GO:0019430	removal of superoxide radicals	1/96	21/23328	0.0829885	0.191885	0.141727	Gch1	1
GO:0032305	BP	GO:0032305	positive regulation of icosanoid secretion	1/96	21/23328	0.0829885	0.191885	0.141727	Il1a	1
GO:0033605	BP	GO:0033605	positive regulation of catecholamine secretion	1/96	21/23328	0.0829885	0.191885	0.141727	Cxcl12	1
GO:0034312	BP	GO:0034312	diol biosynthetic process	1/96	21/23328	0.0829885	0.191885	0.141727	Gch1	1
GO:0035493	BP	GO:0035493	SNARE complex assembly	1/96	21/23328	0.0829885	0.191885	0.141727	Uvrag	1
GO:0043117	BP	GO:0043117	positive regulation of vascular permeability	1/96	21/23328	0.0829885	0.191885	0.141727	Ccl4	1
GO:0045063	BP	GO:0045063	T-helper 1 cell differentiation	1/96	21/23328	0.0829885	0.191885	0.141727	Gadd45g	1
GO:0045475	BP	GO:0045475	locomotor rhythm	1/96	21/23328	0.0829885	0.191885	0.141727	Egr1	1
GO:0046697	BP	GO:0046697	decidualization	1/96	21/23328	0.0829885	0.191885	0.141727	Junb	1
GO:0046716	BP	GO:0046716	muscle cell cellular homeostasis	1/96	21/23328	0.0829885	0.191885	0.141727	Bag3	1
GO:0048486	BP	GO:0048486	parasympathetic nervous system development	1/96	21/23328	0.0829885	0.191885	0.141727	Egr2	1
GO:0048569	BP	GO:0048569	post-embryonic animal organ development	1/96	21/23328	0.0829885	0.191885	0.141727	Flt1	1
GO:0050434	BP	GO:0050434	positive regulation of viral transcription	1/96	21/23328	0.0829885	0.191885	0.141727	Jun	1
GO:0050966	BP	GO:0050966	detection of mechanical stimulus involved in sensory perception of pain	1/96	21/23328	0.0829885	0.191885	0.141727	Cxcl12	1
GO:0051383	BP	GO:0051383	kinetochore organization	1/96	21/23328	0.0829885	0.191885	0.141727	Cenpa	1
GO:0090026	BP	GO:0090026	positive regulation of monocyte chemotaxis	1/96	21/23328	0.0829885	0.191885	0.141727	Cxcl12	1
GO:0090036	BP	GO:0090036	regulation of protein kinase C signaling	1/96	21/23328	0.0829885	0.191885	0.141727	Akap12	1
GO:0098543	BP	GO:0098543	detection of other organism	1/96	21/23328	0.0829885	0.191885	0.141727	Tlr2	1
GO:1901623	BP	GO:1901623	regulation of lymphocyte chemotaxis	1/96	21/23328	0.0829885	0.191885	0.141727	Ccl4	1
GO:0010001	BP	GO:0010001	glial cell differentiation	3/96	249/23328	0.0835263	0.192937	0.142504	Pmp22/Tlr2/Egr2	3
GO:0009314	BP	GO:0009314	response to radiation	4/96	401/23328	0.083791	0.193295	0.142768	Per1/Jun/Egr1/Cdkn1a	4
GO:0000086	BP	GO:0000086	G2/M transition of mitotic cell cycle	2/96	117/23328	0.0839297	0.193295	0.142768	Cdkn1a/Ier3	2
GO:0002286	BP	GO:0002286	T cell activation involved in immune response	2/96	117/23328	0.0839297	0.193295	0.142768	Nfkbiz/Gadd45g	2
GO:0007411	BP	GO:0007411	axon guidance	3/96	251/23328	0.0850759	0.195348	0.144284	Cxcl12/Bdnf/Egr2	3
GO:1901215	BP	GO:1901215	negative regulation of neuron death	3/96	251/23328	0.0850759	0.195348	0.144284	Jun/Cebpb/Bdnf	3
GO:0021782	BP	GO:0021782	glial cell development	2/96	118/23328	0.0851558	0.195348	0.144284	Pmp22/Tlr2	2
GO:0046545	BP	GO:0046545	development of primary female sexual characteristics	2/96	118/23328	0.0851558	0.195348	0.144284	Cebpb/Adamts1	2
GO:0097485	BP	GO:0097485	neuron projection guidance	3/96	252/23328	0.0858553	0.195579	0.144455	Cxcl12/Bdnf/Egr2	3
GO:2000278	BP	GO:2000278	regulation of DNA biosynthetic process	2/96	119/23328	0.0863873	0.195579	0.144455	Dusp1/Cdkn1a	2
GO:0071375	BP	GO:0071375	cellular response to peptide hormone stimulus	3/96	253/23328	0.0866378	0.195579	0.144455	Csk/Zfp36l1/Socs3	3
GO:0006120	BP	GO:0006120	mitochondrial electron transport, NADH to ubiquinone	1/96	22/23328	0.0867656	0.195579	0.144455	Bdnf	1
GO:0009154	BP	GO:0009154	purine ribonucleotide catabolic process	1/96	22/23328	0.0867656	0.195579	0.144455	Pde4d	1
GO:0009261	BP	GO:0009261	ribonucleotide catabolic process	1/96	22/23328	0.0867656	0.195579	0.144455	Pde4d	1
GO:0031649	BP	GO:0031649	heat generation	1/96	22/23328	0.0867656	0.195579	0.144455	Il1a	1
GO:0035634	BP	GO:0035634	response to stilbenoid	1/96	22/23328	0.0867656	0.195579	0.144455	Hba-a1	1
GO:0045624	BP	GO:0045624	positive regulation of T-helper cell differentiation	1/96	22/23328	0.0867656	0.195579	0.144455	Nfkbiz	1
GO:0045943	BP	GO:0045943	positive regulation of transcription by RNA polymerase I	1/96	22/23328	0.0867656	0.195579	0.144455	Ppp1r15a	1
GO:0048532	BP	GO:0048532	anatomical structure arrangement	1/96	22/23328	0.0867656	0.195579	0.144455	Egr2	1
GO:0051873	BP	GO:0051873	killing by host of symbiont cells	1/96	22/23328	0.0867656	0.195579	0.144455	Cxcl1	1
GO:0060009	BP	GO:0060009	Sertoli cell development	1/96	22/23328	0.0867656	0.195579	0.144455	Il1a	1
GO:0071577	BP	GO:0071577	zinc ion transmembrane transport	1/96	22/23328	0.0867656	0.195579	0.144455	Slc30a1	1
GO:0072111	BP	GO:0072111	cell proliferation involved in kidney development	1/96	22/23328	0.0867656	0.195579	0.144455	Egr1	1
GO:0072215	BP	GO:0072215	regulation of metanephros development	1/96	22/23328	0.0867656	0.195579	0.144455	Egr1	1
GO:1901741	BP	GO:1901741	positive regulation of myoblast fusion	1/96	22/23328	0.0867656	0.195579	0.144455	Cxcl12	1
GO:1903514	BP	GO:1903514	release of sequestered calcium ion into cytosol by endoplasmic reticulum	1/96	22/23328	0.0867656	0.195579	0.144455	Pde4d	1
GO:0090068	BP	GO:0090068	positive regulation of cell cycle process	3/96	254/23328	0.0874234	0.196871	0.14541	Cdkn1a/Adamts1/Il1a	3
GO:0006090	BP	GO:0006090	pyruvate metabolic process	2/96	120/23328	0.0876243	0.197134	0.145603	Cbfa2t3/Ier3	2
GO:0003012	BP	GO:0003012	muscle system process	4/96	408/23328	0.0879481	0.197671	0.146	Mef2a/Pde4d/Lmna/Errfi1	4
GO:0048638	BP	GO:0048638	regulation of developmental growth	4/96	409/23328	0.0885501	0.198833	0.146858	Cxcl12/Dusp6/Cdkn1a/Bdnf	4
GO:0015837	BP	GO:0015837	amine transport	2/96	121/23328	0.0888666	0.199352	0.147241	Avp/Cxcl12	2
GO:0050868	BP	GO:0050868	negative regulation of T cell activation	2/96	122/23328	0.0901141	0.20038	0.148001	Cebpb/Cd86	2
GO:1903828	BP	GO:1903828	negative regulation of cellular protein localization	2/96	122/23328	0.0901141	0.20038	0.148001	Csk/Bag3	2
GO:0031579	BP	GO:0031579	membrane raft organization	1/96	23/23328	0.0905273	0.20038	0.148001	Pmp22	1
GO:0032930	BP	GO:0032930	positive regulation of superoxide anion generation	1/96	23/23328	0.0905273	0.20038	0.148001	Cxcl1	1
GO:0034383	BP	GO:0034383	low-density lipoprotein particle clearance	1/96	23/23328	0.0905273	0.20038	0.148001	Csk	1
GO:0035278	BP	GO:0035278	miRNA mediated inhibition of translation	1/96	23/23328	0.0905273	0.20038	0.148001	Zfp36	1
GO:0050961	BP	GO:0050961	detection of temperature stimulus involved in sensory perception	1/96	23/23328	0.0905273	0.20038	0.148001	Cxcl12	1
GO:0051043	BP	GO:0051043	regulation of membrane protein ectodomain proteolysis	1/96	23/23328	0.0905273	0.20038	0.148001	Timp1	1
GO:0051969	BP	GO:0051969	regulation of transmission of nerve impulse	1/96	23/23328	0.0905273	0.20038	0.148001	Avp	1
GO:0071450	BP	GO:0071450	cellular response to oxygen radical	1/96	23/23328	0.0905273	0.20038	0.148001	Gch1	1
GO:0071451	BP	GO:0071451	cellular response to superoxide	1/96	23/23328	0.0905273	0.20038	0.148001	Gch1	1
GO:0101023	BP	GO:0101023	vascular endothelial cell proliferation	1/96	23/23328	0.0905273	0.20038	0.148001	Flt1	1
GO:1905562	BP	GO:1905562	regulation of vascular endothelial cell proliferation	1/96	23/23328	0.0905273	0.20038	0.148001	Flt1	1
GO:2000316	BP	GO:2000316	regulation of T-helper 17 type immune response	1/96	23/23328	0.0905273	0.20038	0.148001	Nfkbiz	1
GO:0032535	BP	GO:0032535	regulation of cellular component size	4/96	413/23328	0.0909781	0.201187	0.148597	Cxcl12/Tlr2/Bdnf/Ppp1r15a	4
GO:0000723	BP	GO:0000723	telomere maintenance	2/96	123/23328	0.0913669	0.201283	0.148668	Lmna/Hspa1a	2
GO:0002040	BP	GO:0002040	sprouting angiogenesis	2/96	123/23328	0.0913669	0.201283	0.148668	Flt1/Ramp2	2
GO:0009132	BP	GO:0009132	nucleoside diphosphate metabolic process	2/96	123/23328	0.0913669	0.201283	0.148668	Cbfa2t3/Ier3	2
GO:0010921	BP	GO:0010921	regulation of phosphatase activity	2/96	123/23328	0.0913669	0.201283	0.148668	Ppp1r15a/Rcan1	2
GO:0044770	BP	GO:0044770	cell cycle phase transition	4/96	415/23328	0.0922041	0.202897	0.14986	Zfp36l1/Cdkn1a/Ier3/Adamts1	4
GO:0003073	BP	GO:0003073	regulation of systemic arterial blood pressure	2/96	124/23328	0.0926249	0.202897	0.14986	Avp/Ier3	2
GO:0051153	BP	GO:0051153	regulation of striated muscle cell differentiation	2/96	124/23328	0.0926249	0.202897	0.14986	Cxcl12/Bdnf	2
GO:0051963	BP	GO:0051963	regulation of synapse assembly	2/96	124/23328	0.0926249	0.202897	0.14986	Tlr2/Bdnf	2
GO:1903052	BP	GO:1903052	positive regulation of proteolysis involved in cellular protein catabolic process	2/96	124/23328	0.0926249	0.202897	0.14986	Cbfa2t3/Hspa1a	2
GO:0010212	BP	GO:0010212	response to ionizing radiation	2/96	125/23328	0.0938879	0.202897	0.14986	Egr1/Cdkn1a	2
GO:0032200	BP	GO:0032200	telomere organization	2/96	125/23328	0.0938879	0.202897	0.14986	Lmna/Hspa1a	2
GO:0000280	BP	GO:0000280	nuclear division	4/96	418/23328	0.094058	0.202897	0.14986	Osm/Phf13/Il1a/Hspa1a	4
GO:0001654	BP	GO:0001654	eye development	4/96	418/23328	0.094058	0.202897	0.14986	Flt1/Jun/Slc25a25/Bdnf	4
GO:0001829	BP	GO:0001829	trophectodermal cell differentiation	1/96	24/23328	0.0942737	0.202897	0.14986	Junb	1
GO:0006691	BP	GO:0006691	leukotriene metabolic process	1/96	24/23328	0.0942737	0.202897	0.14986	Tlr2	1
GO:0015732	BP	GO:0015732	prostaglandin transport	1/96	24/23328	0.0942737	0.202897	0.14986	Il1a	1
GO:0022010	BP	GO:0022010	central nervous system myelination	1/96	24/23328	0.0942737	0.202897	0.14986	Tlr2	1
GO:0030728	BP	GO:0030728	ovulation	1/96	24/23328	0.0942737	0.202897	0.14986	Adamts1	1
GO:0031643	BP	GO:0031643	positive regulation of myelination	1/96	24/23328	0.0942737	0.202897	0.14986	Egr2	1
GO:0032291	BP	GO:0032291	axon ensheathment in central nervous system	1/96	24/23328	0.0942737	0.202897	0.14986	Tlr2	1
GO:0032691	BP	GO:0032691	negative regulation of interleukin-1 beta production	1/96	24/23328	0.0942737	0.202897	0.14986	Errfi1	1
GO:0040033	BP	GO:0040033	negative regulation of translation, ncRNA-mediated	1/96	24/23328	0.0942737	0.202897	0.14986	Zfp36	1
GO:0043586	BP	GO:0043586	tongue development	1/96	24/23328	0.0942737	0.202897	0.14986	Bdnf	1
GO:0045736	BP	GO:0045736	negative regulation of cyclin-dependent protein serine/threonine kinase activity	1/96	24/23328	0.0942737	0.202897	0.14986	Cdkn1a	1
GO:0045974	BP	GO:0045974	regulation of translation, ncRNA-mediated	1/96	24/23328	0.0942737	0.202897	0.14986	Zfp36	1
GO:0048670	BP	GO:0048670	regulation of collateral sprouting	1/96	24/23328	0.0942737	0.202897	0.14986	Bdnf	1
GO:0071459	BP	GO:0071459	protein localization to chromosome, centromeric region	1/96	24/23328	0.0942737	0.202897	0.14986	Cenpa	1
GO:0098869	BP	GO:0098869	cellular oxidant detoxification	1/96	24/23328	0.0942737	0.202897	0.14986	Gch1	1
GO:1903077	BP	GO:1903077	negative regulation of protein localization to plasma membrane	1/96	24/23328	0.0942737	0.202897	0.14986	Csk	1
GO:0001889	BP	GO:0001889	liver development	2/96	126/23328	0.0951559	0.203856	0.150568	Jun/Cebpb	2
GO:0031341	BP	GO:0031341	regulation of cell killing	2/96	126/23328	0.0951559	0.203856	0.150568	Prf1/Cxcl1	2
GO:0036294	BP	GO:0036294	cellular response to decreased oxygen levels	2/96	126/23328	0.0951559	0.203856	0.150568	Zfp36l1/Egr1	2
GO:0046822	BP	GO:0046822	regulation of nucleocytoplasmic transport	2/96	126/23328	0.0951559	0.203856	0.150568	Bag3/Ier3	2
GO:0051053	BP	GO:0051053	negative regulation of DNA metabolic process	2/96	126/23328	0.0951559	0.203856	0.150568	Dusp1/Cdkn1a	2
GO:0006611	BP	GO:0006611	protein export from nucleus	2/96	127/23328	0.0964289	0.205063	0.15146	Bag3/Egr2	2
GO:0051101	BP	GO:0051101	regulation of DNA binding	2/96	127/23328	0.0964289	0.205063	0.15146	Runx1t1/Jun	2
GO:0060249	BP	GO:0060249	anatomical structure homeostasis	4/96	422/23328	0.0965574	0.205063	0.15146	Csk/Lmna/Bag3/Hspa1a	4
GO:0150063	BP	GO:0150063	visual system development	4/96	422/23328	0.0965574	0.205063	0.15146	Flt1/Jun/Slc25a25/Bdnf	4
GO:0032609	BP	GO:0032609	interferon-gamma production	2/96	128/23328	0.0977069	0.205063	0.15146	Gadd45g/Cd14	2
GO:0061013	BP	GO:0061013	regulation of mRNA catabolic process	2/96	128/23328	0.0977069	0.205063	0.15146	Zfp36l1/Zfp36	2
GO:0061387	BP	GO:0061387	regulation of extent of cell growth	2/96	128/23328	0.0977069	0.205063	0.15146	Cxcl12/Bdnf	2
GO:0002418	BP	GO:0002418	immune response to tumor cell	1/96	25/23328	0.0980048	0.205063	0.15146	Prf1	1
GO:0006760	BP	GO:0006760	folic acid-containing compound metabolic process	1/96	25/23328	0.0980048	0.205063	0.15146	Gch1	1
GO:0014048	BP	GO:0014048	regulation of glutamate secretion	1/96	25/23328	0.0980048	0.205063	0.15146	Avp	1
GO:0032515	BP	GO:0032515	negative regulation of phosphoprotein phosphatase activity	1/96	25/23328	0.0980048	0.205063	0.15146	Ppp1r15a	1
GO:0032703	BP	GO:0032703	negative regulation of interleukin-2 production	1/96	25/23328	0.0980048	0.205063	0.15146	Zfp36	1
GO:0032753	BP	GO:0032753	positive regulation of interleukin-4 production	1/96	25/23328	0.0980048	0.205063	0.15146	Cebpb	1
GO:0035813	BP	GO:0035813	regulation of renal sodium excretion	1/96	25/23328	0.0980048	0.205063	0.15146	Avp	1
GO:0042430	BP	GO:0042430	indole-containing compound metabolic process	1/96	25/23328	0.0980048	0.205063	0.15146	Gch1	1
GO:0046426	BP	GO:0046426	negative regulation of receptor signaling pathway via JAK-STAT	1/96	25/23328	0.0980048	0.205063	0.15146	Socs3	1
GO:0048266	BP	GO:0048266	behavioral response to pain	1/96	25/23328	0.0980048	0.205063	0.15146	Osm	1
GO:0051883	BP	GO:0051883	killing of cells in other organism involved in symbiotic interaction	1/96	25/23328	0.0980048	0.205063	0.15146	Cxcl1	1
GO:0060004	BP	GO:0060004	reflex	1/96	25/23328	0.0980048	0.205063	0.15146	Pmp22	1
GO:0090169	BP	GO:0090169	regulation of spindle assembly	1/96	25/23328	0.0980048	0.205063	0.15146	Hspa1a	1
GO:0097164	BP	GO:0097164	ammonium ion metabolic process	1/96	25/23328	0.0980048	0.205063	0.15146	Gch1	1
GO:1901739	BP	GO:1901739	regulation of myoblast fusion	1/96	25/23328	0.0980048	0.205063	0.15146	Cxcl12	1
GO:1902230	BP	GO:1902230	negative regulation of intrinsic apoptotic signaling pathway in response to DNA damage	1/96	25/23328	0.0980048	0.205063	0.15146	Cxcl12	1
GO:1904738	BP	GO:1904738	vascular associated smooth muscle cell migration	1/96	25/23328	0.0980048	0.205063	0.15146	Adamts1	1
GO:1904752	BP	GO:1904752	regulation of vascular associated smooth muscle cell migration	1/96	25/23328	0.0980048	0.205063	0.15146	Adamts1	1
GO:2000193	BP	GO:2000193	positive regulation of fatty acid transport	1/96	25/23328	0.0980048	0.205063	0.15146	Il1a	1
GO:0006914	BP	GO:0006914	autophagy	4/96	425/23328	0.0984526	0.205289	0.151627	Uvrag/Bag3/Pmp22/Tlr2	4
GO:0061919	BP	GO:0061919	process utilizing autophagic mechanism	4/96	425/23328	0.0984526	0.205289	0.151627	Uvrag/Bag3/Pmp22/Tlr2	4
GO:0140014	BP	GO:0140014	mitotic nuclear division	3/96	268/23328	0.0987349	0.205289	0.151627	Phf13/Il1a/Hspa1a	3
GO:0006690	BP	GO:0006690	icosanoid metabolic process	2/96	129/23328	0.0989896	0.205289	0.151627	Avp/Tlr2	2
GO:0061008	BP	GO:0061008	hepaticobiliary system development	2/96	129/23328	0.0989896	0.205289	0.151627	Jun/Cebpb	2
GO:0061844	BP	GO:0061844	antimicrobial humoral immune response mediated by antimicrobial peptide	2/96	129/23328	0.0989896	0.205289	0.151627	Cxcl12/Cxcl1	2
GO:0048880	BP	GO:0048880	sensory system development	4/96	426/23328	0.0990882	0.205289	0.151627	Flt1/Jun/Slc25a25/Bdnf	4
GO:0009117	BP	GO:0009117	nucleotide metabolic process	4/96	427/23328	0.0997257	0.205289	0.151627	Oasl2/Cbfa2t3/Pde4d/Ier3	4
GO:0007631	BP	GO:0007631	feeding behavior	2/96	130/23328	0.100277	0.205289	0.151627	Pmch/Bdnf	2
GO:0042752	BP	GO:0042752	regulation of circadian rhythm	2/96	130/23328	0.100277	0.205289	0.151627	Pmch/Per1	2
GO:0007093	BP	GO:0007093	mitotic cell cycle checkpoint	2/96	131/23328	0.101569	0.205289	0.151627	Cdkn1a/Ier3	2
GO:0032434	BP	GO:0032434	regulation of proteasomal ubiquitin-dependent protein catabolic process	2/96	131/23328	0.101569	0.205289	0.151627	Cbfa2t3/Hspa1a	2
GO:0000002	BP	GO:0000002	mitochondrial genome maintenance	1/96	26/23328	0.101721	0.205289	0.151627	Mef2a	1
GO:0000289	BP	GO:0000289	nuclear-transcribed mRNA poly(A) tail shortening	1/96	26/23328	0.101721	0.205289	0.151627	Zfp36	1
GO:0000303	BP	GO:0000303	response to superoxide	1/96	26/23328	0.101721	0.205289	0.151627	Gch1	1
GO:0003084	BP	GO:0003084	positive regulation of systemic arterial blood pressure	1/96	26/23328	0.101721	0.205289	0.151627	Avp	1
GO:0006195	BP	GO:0006195	purine nucleotide catabolic process	1/96	26/23328	0.101721	0.205289	0.151627	Pde4d	1
GO:0006817	BP	GO:0006817	phosphate ion transport	1/96	26/23328	0.101721	0.205289	0.151627	Cebpb	1
GO:0007263	BP	GO:0007263	nitric oxide mediated signal transduction	1/96	26/23328	0.101721	0.205289	0.151627	Mt2	1
GO:0007620	BP	GO:0007620	copulation	1/96	26/23328	0.101721	0.205289	0.151627	Avp	1
GO:0009713	BP	GO:0009713	catechol-containing compound biosynthetic process	1/96	26/23328	0.101721	0.205289	0.151627	Gch1	1
GO:0010575	BP	GO:0010575	positive regulation of vascular endothelial growth factor production	1/96	26/23328	0.101721	0.205289	0.151627	Il1a	1
GO:0031440	BP	GO:0031440	regulation of mRNA 3'-end processing	1/96	26/23328	0.101721	0.205289	0.151627	Zfp36l1	1
GO:0032303	BP	GO:0032303	regulation of icosanoid secretion	1/96	26/23328	0.101721	0.205289	0.151627	Il1a	1
GO:0032928	BP	GO:0032928	regulation of superoxide anion generation	1/96	26/23328	0.101721	0.205289	0.151627	Cxcl1	1
GO:0033622	BP	GO:0033622	integrin activation	1/96	26/23328	0.101721	0.205289	0.151627	Cxcl12	1
GO:0034104	BP	GO:0034104	negative regulation of tissue remodeling	1/96	26/23328	0.101721	0.205289	0.151627	Csk	1
GO:0034123	BP	GO:0034123	positive regulation of toll-like receptor signaling pathway	1/96	26/23328	0.101721	0.205289	0.151627	Tlr2	1
GO:0042104	BP	GO:0042104	positive regulation of activated T cell proliferation	1/96	26/23328	0.101721	0.205289	0.151627	Cd86	1
GO:0042423	BP	GO:0042423	catecholamine biosynthetic process	1/96	26/23328	0.101721	0.205289	0.151627	Gch1	1
GO:0044342	BP	GO:0044342	type B pancreatic cell proliferation	1/96	26/23328	0.101721	0.205289	0.151627	Errfi1	1
GO:0045723	BP	GO:0045723	positive regulation of fatty acid biosynthetic process	1/96	26/23328	0.101721	0.205289	0.151627	Avp	1
GO:0050927	BP	GO:0050927	positive regulation of positive chemotaxis	1/96	26/23328	0.101721	0.205289	0.151627	Cxcl12	1
GO:0051570	BP	GO:0051570	regulation of histone H3-K9 methylation	1/96	26/23328	0.101721	0.205289	0.151627	Lmna	1
GO:0072012	BP	GO:0072012	glomerulus vasculature development	1/96	26/23328	0.101721	0.205289	0.151627	Egr1	1
GO:0090280	BP	GO:0090280	positive regulation of calcium ion import	1/96	26/23328	0.101721	0.205289	0.151627	Cxcl12	1
GO:1903747	BP	GO:1903747	regulation of establishment of protein localization to mitochondrion	1/96	26/23328	0.101721	0.205289	0.151627	Bag3	1
GO:1904030	BP	GO:1904030	negative regulation of cyclin-dependent protein kinase activity	1/96	26/23328	0.101721	0.205289	0.151627	Cdkn1a	1
GO:1904376	BP	GO:1904376	negative regulation of protein localization to cell periphery	1/96	26/23328	0.101721	0.205289	0.151627	Csk	1
GO:1904893	BP	GO:1904893	negative regulation of receptor signaling pathway via STAT	1/96	26/23328	0.101721	0.205289	0.151627	Socs3	1
GO:2000637	BP	GO:2000637	positive regulation of gene silencing by miRNA	1/96	26/23328	0.101721	0.205289	0.151627	Zfp36	1
GO:0002699	BP	GO:0002699	positive regulation of immune effector process	3/96	273/23328	0.102912	0.207515	0.153271	Tlr2/Nfkbiz/Cxcl1	3
GO:0000305	BP	GO:0000305	response to oxygen radical	1/96	27/23328	0.105421	0.207629	0.153355	Gch1	1
GO:0016048	BP	GO:0016048	detection of temperature stimulus	1/96	27/23328	0.105421	0.207629	0.153355	Cxcl12	1
GO:0032069	BP	GO:0032069	regulation of nuclease activity	1/96	27/23328	0.105421	0.207629	0.153355	Oasl2	1
GO:0032770	BP	GO:0032770	positive regulation of monooxygenase activity	1/96	27/23328	0.105421	0.207629	0.153355	Gch1	1
GO:0035812	BP	GO:0035812	renal sodium excretion	1/96	27/23328	0.105421	0.207629	0.153355	Avp	1
GO:0042753	BP	GO:0042753	positive regulation of circadian rhythm	1/96	27/23328	0.105421	0.207629	0.153355	Pmch	1
GO:0046885	BP	GO:0046885	regulation of hormone biosynthetic process	1/96	27/23328	0.105421	0.207629	0.153355	Egr1	1
GO:0050849	BP	GO:0050849	negative regulation of calcium-mediated signaling	1/96	27/23328	0.105421	0.207629	0.153355	Rcan1	1
GO:0050926	BP	GO:0050926	regulation of positive chemotaxis	1/96	27/23328	0.105421	0.207629	0.153355	Cxcl12	1
GO:0060008	BP	GO:0060008	Sertoli cell differentiation	1/96	27/23328	0.105421	0.207629	0.153355	Il1a	1
GO:0060148	BP	GO:0060148	positive regulation of posttranscriptional gene silencing	1/96	27/23328	0.105421	0.207629	0.153355	Zfp36	1
GO:0060343	BP	GO:0060343	trabecula formation	1/96	27/23328	0.105421	0.207629	0.153355	Adamts1	1
GO:0060716	BP	GO:0060716	labyrinthine layer blood vessel development	1/96	27/23328	0.105421	0.207629	0.153355	Junb	1
GO:0061437	BP	GO:0061437	renal system vasculature development	1/96	27/23328	0.105421	0.207629	0.153355	Egr1	1
GO:0061440	BP	GO:0061440	kidney vasculature development	1/96	27/23328	0.105421	0.207629	0.153355	Egr1	1
GO:0071361	BP	GO:0071361	cellular response to ethanol	1/96	27/23328	0.105421	0.207629	0.153355	Ccl7	1
GO:0071425	BP	GO:0071425	hematopoietic stem cell proliferation	1/96	27/23328	0.105421	0.207629	0.153355	Cxcl1	1
GO:0071472	BP	GO:0071472	cellular response to salt stress	1/96	27/23328	0.105421	0.207629	0.153355	Zfp36l1	1
GO:0071677	BP	GO:0071677	positive regulation of mononuclear cell migration	1/96	27/23328	0.105421	0.207629	0.153355	Cxcl12	1
GO:0098581	BP	GO:0098581	detection of external biotic stimulus	1/96	27/23328	0.105421	0.207629	0.153355	Tlr2	1
GO:1900120	BP	GO:1900120	regulation of receptor binding	1/96	27/23328	0.105421	0.207629	0.153355	Bdnf	1
GO:1904994	BP	GO:1904994	regulation of leukocyte adhesion to vascular endothelial cell	1/96	27/23328	0.105421	0.207629	0.153355	Cxcl12	1
GO:1905809	BP	GO:1905809	negative regulation of synapse organization	1/96	27/23328	0.105421	0.207629	0.153355	Tlr2	1
GO:1905939	BP	GO:1905939	regulation of gonad development	1/96	27/23328	0.105421	0.207629	0.153355	Il1a	1
GO:0061448	BP	GO:0061448	connective tissue development	3/96	276/23328	0.105452	0.207629	0.153355	Lmna/Slc25a25/Egr1	3
GO:0009791	BP	GO:0009791	post-embryonic development	2/96	134/23328	0.105474	0.207629	0.153355	Flt1/Csrnp1	2
GO:0044839	BP	GO:0044839	cell cycle G2/M phase transition	2/96	134/23328	0.105474	0.207629	0.153355	Cdkn1a/Ier3	2
GO:1902806	BP	GO:1902806	regulation of cell cycle G1/S phase transition	2/96	134/23328	0.105474	0.207629	0.153355	Cdkn1a/Adamts1	2
GO:0006753	BP	GO:0006753	nucleoside phosphate metabolic process	4/96	436/23328	0.10555	0.207629	0.153355	Oasl2/Cbfa2t3/Pde4d/Ier3	4
GO:0043467	BP	GO:0043467	regulation of generation of precursor metabolites and energy	2/96	135/23328	0.106785	0.209881	0.155018	Cbfa2t3/Ier3	2
GO:0030336	BP	GO:0030336	negative regulation of cell migration	3/96	278/23328	0.10716	0.210441	0.155432	Cxcl12/Dusp1/Timp1	3
GO:0051928	BP	GO:0051928	positive regulation of calcium ion transport	2/96	136/23328	0.1081	0.211593	0.156283	Cxcl12/Ccl4	2
GO:0002347	BP	GO:0002347	response to tumor cell	1/96	28/23328	0.109107	0.211593	0.156283	Prf1	1
GO:0002693	BP	GO:0002693	positive regulation of cellular extravasation	1/96	28/23328	0.109107	0.211593	0.156283	Il1a	1
GO:0010460	BP	GO:0010460	positive regulation of heart rate	1/96	28/23328	0.109107	0.211593	0.156283	Gch1	1
GO:0010738	BP	GO:0010738	regulation of protein kinase A signaling	1/96	28/23328	0.109107	0.211593	0.156283	Akap12	1
GO:0019835	BP	GO:0019835	cytolysis	1/96	28/23328	0.109107	0.211593	0.156283	Prf1	1
GO:0032801	BP	GO:0032801	receptor catabolic process	1/96	28/23328	0.109107	0.211593	0.156283	Uvrag	1
GO:0033233	BP	GO:0033233	regulation of protein sumoylation	1/96	28/23328	0.109107	0.211593	0.156283	Egr1	1
GO:0034311	BP	GO:0034311	diol metabolic process	1/96	28/23328	0.109107	0.211593	0.156283	Gch1	1
GO:0042744	BP	GO:0042744	hydrogen peroxide catabolic process	1/96	28/23328	0.109107	0.211593	0.156283	Hba-a1	1
GO:0072395	BP	GO:0072395	signal transduction involved in cell cycle checkpoint	1/96	28/23328	0.109107	0.211593	0.156283	Cdkn1a	1
GO:0072401	BP	GO:0072401	signal transduction involved in DNA integrity checkpoint	1/96	28/23328	0.109107	0.211593	0.156283	Cdkn1a	1
GO:0072422	BP	GO:0072422	signal transduction involved in DNA damage checkpoint	1/96	28/23328	0.109107	0.211593	0.156283	Cdkn1a	1
GO:1901532	BP	GO:1901532	regulation of hematopoietic progenitor cell differentiation	1/96	28/23328	0.109107	0.211593	0.156283	Flt1	1
GO:2000178	BP	GO:2000178	negative regulation of neural precursor cell proliferation	1/96	28/23328	0.109107	0.211593	0.156283	Bdnf	1
GO:0035821	BP	GO:0035821	modulation of process of other organism	2/96	137/23328	0.109419	0.212022	0.1566	Jun/Ccl4	2
GO:0048675	BP	GO:0048675	axon extension	2/96	138/23328	0.110743	0.214231	0.158231	Cxcl12/Bdnf	2
GO:0097306	BP	GO:0097306	cellular response to alcohol	2/96	138/23328	0.110743	0.214231	0.158231	Ccl7/Npas4	2
GO:0010565	BP	GO:0010565	regulation of cellular ketone metabolic process	2/96	139/23328	0.112071	0.215311	0.159029	Avp/Egr1	2
GO:0055007	BP	GO:0055007	cardiac muscle cell differentiation	2/96	139/23328	0.112071	0.215311	0.159029	Mef2a/Lmna	2
GO:1900180	BP	GO:1900180	regulation of protein localization to nucleus	2/96	139/23328	0.112071	0.215311	0.159029	Lmna/Bag3	2
GO:0001516	BP	GO:0001516	prostaglandin biosynthetic process	1/96	29/23328	0.112778	0.215311	0.159029	Avp	1
GO:0002507	BP	GO:0002507	tolerance induction	1/96	29/23328	0.112778	0.215311	0.159029	Cd86	1
GO:0003085	BP	GO:0003085	negative regulation of systemic arterial blood pressure	1/96	29/23328	0.112778	0.215311	0.159029	Ier3	1
GO:0007214	BP	GO:0007214	gamma-aminobutyric acid signaling pathway	1/96	29/23328	0.112778	0.215311	0.159029	Bdnf	1
GO:0010893	BP	GO:0010893	positive regulation of steroid biosynthetic process	1/96	29/23328	0.112778	0.215311	0.159029	Il1a	1
GO:0031295	BP	GO:0031295	T cell costimulation	1/96	29/23328	0.112778	0.215311	0.159029	Cd86	1
GO:0034508	BP	GO:0034508	centromere complex assembly	1/96	29/23328	0.112778	0.215311	0.159029	Cenpa	1
GO:0045187	BP	GO:0045187	regulation of circadian sleep/wake cycle, sleep	1/96	29/23328	0.112778	0.215311	0.159029	Pmch	1
GO:0045822	BP	GO:0045822	negative regulation of heart contraction	1/96	29/23328	0.112778	0.215311	0.159029	Pde4d	1
GO:0046457	BP	GO:0046457	prostanoid biosynthetic process	1/96	29/23328	0.112778	0.215311	0.159029	Avp	1
GO:0070296	BP	GO:0070296	sarcoplasmic reticulum calcium ion transport	1/96	29/23328	0.112778	0.215311	0.159029	Pde4d	1
GO:0071353	BP	GO:0071353	cellular response to interleukin-4	1/96	29/23328	0.112778	0.215311	0.159029	Nfil3	1
GO:0097345	BP	GO:0097345	mitochondrial outer membrane permeabilization	1/96	29/23328	0.112778	0.215311	0.159029	Ier3	1
GO:0050905	BP	GO:0050905	neuromuscular process	2/96	140/23328	0.113403	0.216151	0.159649	Gch1/Pmp22	2
GO:0071453	BP	GO:0071453	cellular response to oxygen levels	2/96	140/23328	0.113403	0.216151	0.159649	Zfp36l1/Egr1	2
GO:0001909	BP	GO:0001909	leukocyte mediated cytotoxicity	2/96	141/23328	0.114739	0.218009	0.161022	Prf1/Cxcl1	2
GO:0042391	BP	GO:0042391	regulation of membrane potential	4/96	450/23328	0.114912	0.218009	0.161022	Jun/Pmp22/Bdnf/Npas4	4
GO:0031647	BP	GO:0031647	regulation of protein stability	3/96	287/23328	0.114975	0.218009	0.161022	Lmna/Bag3/Rassf1	3
GO:0016052	BP	GO:0016052	carbohydrate catabolic process	2/96	142/23328	0.116079	0.218009	0.161022	Cbfa2t3/Ier3	2
GO:1902850	BP	GO:1902850	microtubule cytoskeleton organization involved in mitosis	2/96	142/23328	0.116079	0.218009	0.161022	Cenpa/Hspa1a	2
GO:0001945	BP	GO:0001945	lymph vessel development	1/96	30/23328	0.116433	0.218009	0.161022	Tmem204	1
GO:0006829	BP	GO:0006829	zinc ion transport	1/96	30/23328	0.116433	0.218009	0.161022	Slc30a1	1
GO:0010922	BP	GO:0010922	positive regulation of phosphatase activity	1/96	30/23328	0.116433	0.218009	0.161022	Ppp1r15a	1
GO:0021602	BP	GO:0021602	cranial nerve morphogenesis	1/96	30/23328	0.116433	0.218009	0.161022	Egr2	1
GO:0030947	BP	GO:0030947	regulation of vascular endothelial growth factor receptor signaling pathway	1/96	30/23328	0.116433	0.218009	0.161022	Tmem204	1
GO:0043153	BP	GO:0043153	entrainment of circadian clock by photoperiod	1/96	30/23328	0.116433	0.218009	0.161022	Per1	1
GO:0043457	BP	GO:0043457	regulation of cellular respiration	1/96	30/23328	0.116433	0.218009	0.161022	Cbfa2t3	1
GO:0043552	BP	GO:0043552	positive regulation of phosphatidylinositol 3-kinase activity	1/96	30/23328	0.116433	0.218009	0.161022	Flt1	1
GO:0043951	BP	GO:0043951	negative regulation of cAMP-mediated signaling	1/96	30/23328	0.116433	0.218009	0.161022	Pde4d	1
GO:0048714	BP	GO:0048714	positive regulation of oligodendrocyte differentiation	1/96	30/23328	0.116433	0.218009	0.161022	Tlr2	1
GO:0050802	BP	GO:0050802	circadian sleep/wake cycle, sleep	1/96	30/23328	0.116433	0.218009	0.161022	Pmch	1
GO:0050951	BP	GO:0050951	sensory perception of temperature stimulus	1/96	30/23328	0.116433	0.218009	0.161022	Cxcl12	1
GO:0051957	BP	GO:0051957	positive regulation of amino acid transport	1/96	30/23328	0.116433	0.218009	0.161022	Avp	1
GO:0060143	BP	GO:0060143	positive regulation of syncytium formation by plasma membrane fusion	1/96	30/23328	0.116433	0.218009	0.161022	Cxcl12	1
GO:0061082	BP	GO:0061082	myeloid leukocyte cytokine production	1/96	30/23328	0.116433	0.218009	0.161022	Tlr2	1
GO:0072539	BP	GO:0072539	T-helper 17 cell differentiation	1/96	30/23328	0.116433	0.218009	0.161022	Nfkbiz	1
GO:0120178	BP	GO:0120178	steroid hormone biosynthetic process	1/96	30/23328	0.116433	0.218009	0.161022	Egr1	1
GO:0030010	BP	GO:0030010	establishment of cell polarity	2/96	143/23328	0.117424	0.219687	0.162261	Lmna/Cenpa	2
GO:2000146	BP	GO:2000146	negative regulation of cell motility	3/96	291/23328	0.118516	0.221192	0.163373	Cxcl12/Dusp1/Timp1	3
GO:0010508	BP	GO:0010508	positive regulation of autophagy	2/96	144/23328	0.118772	0.221192	0.163373	Bag3/Tlr2	2
GO:0000132	BP	GO:0000132	establishment of mitotic spindle orientation	1/96	31/23328	0.120074	0.221192	0.163373	Cenpa	1
GO:0001963	BP	GO:0001963	synaptic transmission, dopaminergic	1/96	31/23328	0.120074	0.221192	0.163373	Pmch	1
GO:0009648	BP	GO:0009648	photoperiodism	1/96	31/23328	0.120074	0.221192	0.163373	Per1	1
GO:0022011	BP	GO:0022011	myelination in peripheral nervous system	1/96	31/23328	0.120074	0.221192	0.163373	Pmp22	1
GO:0031294	BP	GO:0031294	lymphocyte costimulation	1/96	31/23328	0.120074	0.221192	0.163373	Cd86	1
GO:0032292	BP	GO:0032292	peripheral nervous system axon ensheathment	1/96	31/23328	0.120074	0.221192	0.163373	Pmp22	1
GO:0033137	BP	GO:0033137	negative regulation of peptidyl-serine phosphorylation	1/96	31/23328	0.120074	0.221192	0.163373	Pde4d	1
GO:0033687	BP	GO:0033687	osteoblast proliferation	1/96	31/23328	0.120074	0.221192	0.163373	Junb	1
GO:0042558	BP	GO:0042558	pteridine-containing compound metabolic process	1/96	31/23328	0.120074	0.221192	0.163373	Gch1	1
GO:0042634	BP	GO:0042634	regulation of hair cycle	1/96	31/23328	0.120074	0.221192	0.163373	Per1	1
GO:0044062	BP	GO:0044062	regulation of excretion	1/96	31/23328	0.120074	0.221192	0.163373	Avp	1
GO:0050901	BP	GO:0050901	leukocyte tethering or rolling	1/96	31/23328	0.120074	0.221192	0.163373	Cxcl12	1
GO:0070670	BP	GO:0070670	response to interleukin-4	1/96	31/23328	0.120074	0.221192	0.163373	Nfil3	1
GO:0072574	BP	GO:0072574	hepatocyte proliferation	1/96	31/23328	0.120074	0.221192	0.163373	Cebpb	1
GO:0072575	BP	GO:0072575	epithelial cell proliferation involved in liver morphogenesis	1/96	31/23328	0.120074	0.221192	0.163373	Cebpb	1
GO:1901889	BP	GO:1901889	negative regulation of cell junction assembly	1/96	31/23328	0.120074	0.221192	0.163373	Tlr2	1
GO:0017148	BP	GO:0017148	negative regulation of translation	2/96	145/23328	0.120125	0.221192	0.163373	Zfp36l1/Zfp36	2
GO:1903364	BP	GO:1903364	positive regulation of cellular protein catabolic process	2/96	145/23328	0.120125	0.221192	0.163373	Cbfa2t3/Hspa1a	2
GO:0034504	BP	GO:0034504	protein localization to nucleus	3/96	293/23328	0.120302	0.221345	0.163486	Lmna/Bag3/Cdkn1a	3
GO:0019233	BP	GO:0019233	sensory perception of pain	2/96	146/23328	0.121481	0.223161	0.164827	Cxcl12/Il1a	2
GO:0051168	BP	GO:0051168	nuclear export	2/96	146/23328	0.121481	0.223161	0.164827	Bag3/Egr2	2
GO:0045667	BP	GO:0045667	regulation of osteoblast differentiation	2/96	147/23328	0.122841	0.224411	0.16575	Lmna/Cebpb	2
GO:0001893	BP	GO:0001893	maternal placenta development	1/96	32/23328	0.1237	0.224411	0.16575	Junb	1
GO:0009649	BP	GO:0009649	entrainment of circadian clock	1/96	32/23328	0.1237	0.224411	0.16575	Per1	1
GO:0010043	BP	GO:0010043	response to zinc ion	1/96	32/23328	0.1237	0.224411	0.16575	Mt2	1
GO:0010574	BP	GO:0010574	regulation of vascular endothelial growth factor production	1/96	32/23328	0.1237	0.224411	0.16575	Il1a	1
GO:0031645	BP	GO:0031645	negative regulation of nervous system process	1/96	32/23328	0.1237	0.224411	0.16575	Avp	1
GO:0032692	BP	GO:0032692	negative regulation of interleukin-1 production	1/96	32/23328	0.1237	0.224411	0.16575	Errfi1	1
GO:0042749	BP	GO:0042749	regulation of circadian sleep/wake cycle	1/96	32/23328	0.1237	0.224411	0.16575	Pmch	1
GO:0043901	BP	GO:0043901	negative regulation of multi-organism process	1/96	32/23328	0.1237	0.224411	0.16575	Timp1	1
GO:0045577	BP	GO:0045577	regulation of B cell differentiation	1/96	32/23328	0.1237	0.224411	0.16575	Zfp36l1	1
GO:0045815	BP	GO:0045815	positive regulation of gene expression, epigenetic	1/96	32/23328	0.1237	0.224411	0.16575	Sertad1	1
GO:0048668	BP	GO:0048668	collateral sprouting	1/96	32/23328	0.1237	0.224411	0.16575	Bdnf	1
GO:0090075	BP	GO:0090075	relaxation of muscle	1/96	32/23328	0.1237	0.224411	0.16575	Pde4d	1
GO:1902110	BP	GO:1902110	positive regulation of mitochondrial membrane permeability involved in apoptotic process	1/96	32/23328	0.1237	0.224411	0.16575	Ier3	1
GO:1905476	BP	GO:1905476	negative regulation of protein localization to membrane	1/96	32/23328	0.1237	0.224411	0.16575	Csk	1
GO:2000352	BP	GO:2000352	negative regulation of endothelial cell apoptotic process	1/96	32/23328	0.1237	0.224411	0.16575	Ramp2	1
GO:0015711	BP	GO:0015711	organic anion transport	4/96	463/23328	0.123924	0.224642	0.165921	Avp/Slc38a5/Bdnf/Il1a	4
GO:0046660	BP	GO:0046660	female sex differentiation	2/96	149/23328	0.125572	0.227276	0.167867	Cebpb/Adamts1	2
GO:0050921	BP	GO:0050921	positive regulation of chemotaxis	2/96	149/23328	0.125572	0.227276	0.167867	Cxcl12/Ccl4	2
GO:1901653	BP	GO:1901653	cellular response to peptide	3/96	299/23328	0.12572	0.227369	0.167935	Csk/Zfp36l1/Socs3	3
GO:0007617	BP	GO:0007617	mating behavior	1/96	33/23328	0.127311	0.229003	0.169142	Avp	1
GO:0022410	BP	GO:0022410	circadian sleep/wake cycle process	1/96	33/23328	0.127311	0.229003	0.169142	Pmch	1
GO:0033081	BP	GO:0033081	regulation of T cell differentiation in thymus	1/96	33/23328	0.127311	0.229003	0.169142	Il1a	1
GO:0033598	BP	GO:0033598	mammary gland epithelial cell proliferation	1/96	33/23328	0.127311	0.229003	0.169142	Cebpb	1
GO:0048841	BP	GO:0048841	regulation of axon extension involved in axon guidance	1/96	33/23328	0.127311	0.229003	0.169142	Cxcl12	1
GO:0060706	BP	GO:0060706	cell differentiation involved in embryonic placenta development	1/96	33/23328	0.127311	0.229003	0.169142	Socs3	1
GO:0072576	BP	GO:0072576	liver morphogenesis	1/96	33/23328	0.127311	0.229003	0.169142	Cebpb	1
GO:0030198	BP	GO:0030198	extracellular matrix organization	3/96	302/23328	0.128462	0.230896	0.17054	Ramp2/Pmp22/Adamts1	3
GO:0043062	BP	GO:0043062	extracellular structure organization	3/96	303/23328	0.129381	0.232189	0.171495	Ramp2/Pmp22/Adamts1	3
GO:0043087	BP	GO:0043087	regulation of GTPase activity	3/96	303/23328	0.129381	0.232189	0.171495	Ccl7/Ccl3/Ccl4	3
GO:0048285	BP	GO:0048285	organelle fission	4/96	472/23328	0.130336	0.232603	0.171801	Osm/Phf13/Il1a/Hspa1a	4
GO:0002021	BP	GO:0002021	response to dietary excess	1/96	34/23328	0.130908	0.232603	0.171801	Slc25a25	1
GO:0006356	BP	GO:0006356	regulation of transcription by RNA polymerase I	1/96	34/23328	0.130908	0.232603	0.171801	Ppp1r15a	1
GO:0014044	BP	GO:0014044	Schwann cell development	1/96	34/23328	0.130908	0.232603	0.171801	Pmp22	1
GO:0032728	BP	GO:0032728	positive regulation of interferon-beta production	1/96	34/23328	0.130908	0.232603	0.171801	Tlr2	1
GO:0062149	BP	GO:0062149	detection of stimulus involved in sensory perception of pain	1/96	34/23328	0.130908	0.232603	0.171801	Cxcl12	1
GO:0090218	BP	GO:0090218	positive regulation of lipid kinase activity	1/96	34/23328	0.130908	0.232603	0.171801	Flt1	1
GO:0097352	BP	GO:0097352	autophagosome maturation	1/96	34/23328	0.130908	0.232603	0.171801	Uvrag	1
GO:0099633	BP	GO:0099633	protein localization to postsynaptic specialization membrane	1/96	34/23328	0.130908	0.232603	0.171801	Nptx2	1
GO:0099645	BP	GO:0099645	neurotransmitter receptor localization to postsynaptic specialization membrane	1/96	34/23328	0.130908	0.232603	0.171801	Nptx2	1
GO:0120255	BP	GO:0120255	olefinic compound biosynthetic process	1/96	34/23328	0.130908	0.232603	0.171801	Egr1	1
GO:1902686	BP	GO:1902686	mitochondrial outer membrane permeabilization involved in programmed cell death	1/96	34/23328	0.130908	0.232603	0.171801	Ier3	1
GO:2000406	BP	GO:2000406	positive regulation of T cell migration	1/96	34/23328	0.130908	0.232603	0.171801	Cxcl12	1
GO:0071478	BP	GO:0071478	cellular response to radiation	2/96	153/23328	0.131078	0.232728	0.171893	Egr1/Cdkn1a	2
GO:0002833	BP	GO:0002833	positive regulation of response to biotic stimulus	2/96	154/23328	0.132463	0.23483	0.173446	Tlr2/Cxcl1	2
GO:1901568	BP	GO:1901568	fatty acid derivative metabolic process	2/96	154/23328	0.132463	0.23483	0.173446	Avp/Tlr2	2
GO:0006457	BP	GO:0006457	protein folding	2/96	155/23328	0.133852	0.235735	0.174114	Dnajb1/Hspa1a	2
GO:0002446	BP	GO:0002446	neutrophil mediated immunity	1/96	35/23328	0.134489	0.235735	0.174114	Cxcl1	1
GO:0009187	BP	GO:0009187	cyclic nucleotide metabolic process	1/96	35/23328	0.134489	0.235735	0.174114	Pde4d	1
GO:0032094	BP	GO:0032094	response to food	1/96	35/23328	0.134489	0.235735	0.174114	Slc25a25	1
GO:0035025	BP	GO:0035025	positive regulation of Rho protein signal transduction	1/96	35/23328	0.134489	0.235735	0.174114	Gpr17	1
GO:0035308	BP	GO:0035308	negative regulation of protein dephosphorylation	1/96	35/23328	0.134489	0.235735	0.174114	Ppp1r15a	1
GO:0040001	BP	GO:0040001	establishment of mitotic spindle localization	1/96	35/23328	0.134489	0.235735	0.174114	Cenpa	1
GO:0050832	BP	GO:0050832	defense response to fungus	1/96	35/23328	0.134489	0.235735	0.174114	Cxcl1	1
GO:0060142	BP	GO:0060142	regulation of syncytium formation by plasma membrane fusion	1/96	35/23328	0.134489	0.235735	0.174114	Cxcl12	1
GO:0060236	BP	GO:0060236	regulation of mitotic spindle organization	1/96	35/23328	0.134489	0.235735	0.174114	Hspa1a	1
GO:0071320	BP	GO:0071320	cellular response to cAMP	1/96	35/23328	0.134489	0.235735	0.174114	Zfp36l1	1
GO:0072538	BP	GO:0072538	T-helper 17 type immune response	1/96	35/23328	0.134489	0.235735	0.174114	Nfkbiz	1
GO:1905898	BP	GO:1905898	positive regulation of response to endoplasmic reticulum stress	1/96	35/23328	0.134489	0.235735	0.174114	Ppp1r15a	1
GO:1990089	BP	GO:1990089	response to nerve growth factor	1/96	35/23328	0.134489	0.235735	0.174114	Bdnf	1
GO:1990090	BP	GO:1990090	cellular response to nerve growth factor stimulus	1/96	35/23328	0.134489	0.235735	0.174114	Bdnf	1
GO:0031346	BP	GO:0031346	positive regulation of cell projection organization	4/96	478/23328	0.134687	0.235904	0.174239	Cxcl12/Bdnf/Adamts1/Lcn2	4
GO:0008202	BP	GO:0008202	steroid metabolic process	3/96	309/23328	0.134943	0.236175	0.174439	Egr1/Pmp22/Il1a	3
GO:0050808	BP	GO:0050808	synapse organization	4/96	479/23328	0.135418	0.236829	0.174922	Pmp22/Tlr2/Bdnf/Npas4	4
GO:1903707	BP	GO:1903707	negative regulation of hemopoiesis	2/96	157/23328	0.136639	0.238582	0.176217	Zfp36l1/Zfp36	2
GO:0007409	BP	GO:0007409	axonogenesis	4/96	482/23328	0.13762	0.238582	0.176217	Cxcl12/Pmp22/Bdnf/Egr2	4
GO:0045927	BP	GO:0045927	positive regulation of growth	3/96	312/23328	0.137755	0.238582	0.176217	Avp/Cxcl12/Bdnf	3
GO:0051250	BP	GO:0051250	negative regulation of lymphocyte activation	2/96	158/23328	0.138038	0.238582	0.176217	Cebpb/Cd86	2
GO:0010573	BP	GO:0010573	vascular endothelial growth factor production	1/96	36/23328	0.138056	0.238582	0.176217	Il1a	1
GO:0010664	BP	GO:0010664	negative regulation of striated muscle cell apoptotic process	1/96	36/23328	0.138056	0.238582	0.176217	Bag3	1
GO:0031424	BP	GO:0031424	keratinization	1/96	36/23328	0.138056	0.238582	0.176217	Il1a	1
GO:0034142	BP	GO:0034142	toll-like receptor 4 signaling pathway	1/96	36/23328	0.138056	0.238582	0.176217	Cd14	1
GO:0034381	BP	GO:0034381	plasma lipoprotein particle clearance	1/96	36/23328	0.138056	0.238582	0.176217	Csk	1
GO:0035886	BP	GO:0035886	vascular associated smooth muscle cell differentiation	1/96	36/23328	0.138056	0.238582	0.176217	Ramp2	1
GO:0042745	BP	GO:0042745	circadian sleep/wake cycle	1/96	36/23328	0.138056	0.238582	0.176217	Pmch	1
GO:0051567	BP	GO:0051567	histone H3-K9 methylation	1/96	36/23328	0.138056	0.238582	0.176217	Lmna	1
GO:0061384	BP	GO:0061384	heart trabecula morphogenesis	1/96	36/23328	0.138056	0.238582	0.176217	Adamts1	1
GO:0071158	BP	GO:0071158	positive regulation of cell cycle arrest	1/96	36/23328	0.138056	0.238582	0.176217	Cdkn1a	1
GO:1902624	BP	GO:1902624	positive regulation of neutrophil migration	1/96	36/23328	0.138056	0.238582	0.176217	Il1a	1
GO:2000191	BP	GO:2000191	regulation of fatty acid transport	1/96	36/23328	0.138056	0.238582	0.176217	Il1a	1
GO:0007569	BP	GO:0007569	cell aging	2/96	159/23328	0.139439	0.240615	0.177719	Lmna/Cdkn1a	2
GO:2000058	BP	GO:2000058	regulation of ubiquitin-dependent protein catabolic process	2/96	159/23328	0.139439	0.240615	0.177719	Cbfa2t3/Hspa1a	2
GO:0007548	BP	GO:0007548	sex differentiation	3/96	315/23328	0.140587	0.240973	0.177983	Cebpb/Adamts1/Il1a	3
GO:0000910	BP	GO:0000910	cytokinesis	2/96	160/23328	0.140844	0.240973	0.177983	Uvrag/Cenpa	2
GO:0007088	BP	GO:0007088	regulation of mitotic nuclear division	2/96	160/23328	0.140844	0.240973	0.177983	Il1a/Hspa1a	2
GO:0051302	BP	GO:0051302	regulation of cell division	2/96	160/23328	0.140844	0.240973	0.177983	Uvrag/Il1a	2
GO:0002218	BP	GO:0002218	activation of innate immune response	1/96	37/23328	0.141609	0.240973	0.177983	Tlr2	1
GO:0009595	BP	GO:0009595	detection of biotic stimulus	1/96	37/23328	0.141609	0.240973	0.177983	Tlr2	1
GO:0014823	BP	GO:0014823	response to activity	1/96	37/23328	0.141609	0.240973	0.177983	Slc25a25	1
GO:0033144	BP	GO:0033144	negative regulation of intracellular steroid hormone receptor signaling pathway	1/96	37/23328	0.141609	0.240973	0.177983	Per1	1
GO:0035794	BP	GO:0035794	positive regulation of mitochondrial membrane permeability	1/96	37/23328	0.141609	0.240973	0.177983	Ier3	1
GO:0040020	BP	GO:0040020	regulation of meiotic nuclear division	1/96	37/23328	0.141609	0.240973	0.177983	Osm	1
GO:0046329	BP	GO:0046329	negative regulation of JNK cascade	1/96	37/23328	0.141609	0.240973	0.177983	Per1	1
GO:0048846	BP	GO:0048846	axon extension involved in axon guidance	1/96	37/23328	0.141609	0.240973	0.177983	Cxcl12	1
GO:0051294	BP	GO:0051294	establishment of spindle orientation	1/96	37/23328	0.141609	0.240973	0.177983	Cenpa	1
GO:0051482	BP	GO:0051482	positive regulation of cytosolic calcium ion concentration involved in phospholipase C-activating G protein-coupled signaling pathway	1/96	37/23328	0.141609	0.240973	0.177983	Gpr17	1
GO:0071709	BP	GO:0071709	membrane assembly	1/96	37/23328	0.141609	0.240973	0.177983	Dmkn	1
GO:1901661	BP	GO:1901661	quinone metabolic process	1/96	37/23328	0.141609	0.240973	0.177983	Coq10b	1
GO:1902229	BP	GO:1902229	regulation of intrinsic apoptotic signaling pathway in response to DNA damage	1/96	37/23328	0.141609	0.240973	0.177983	Cxcl12	1
GO:1902284	BP	GO:1902284	neuron projection extension involved in neuron projection guidance	1/96	37/23328	0.141609	0.240973	0.177983	Cxcl12	1
GO:1990748	BP	GO:1990748	cellular detoxification	1/96	37/23328	0.141609	0.240973	0.177983	Gch1	1
GO:0006694	BP	GO:0006694	steroid biosynthetic process	2/96	161/23328	0.142252	0.241715	0.178531	Egr1/Il1a	2
GO:0009755	BP	GO:0009755	hormone-mediated signaling pathway	2/96	161/23328	0.142252	0.241715	0.178531	Per1/Bdnf	2
GO:0001822	BP	GO:0001822	kidney development	3/96	318/23328	0.143439	0.243554	0.179889	Egr1/Bdnf/Adamts1	3
GO:0010675	BP	GO:0010675	regulation of cellular carbohydrate metabolic process	2/96	162/23328	0.143663	0.243757	0.180039	Cbfa2t3/Ier3	2
GO:0001706	BP	GO:0001706	endoderm formation	1/96	38/23328	0.145147	0.244144	0.180325	Dusp1	1
GO:0002861	BP	GO:0002861	regulation of inflammatory response to antigenic stimulus	1/96	38/23328	0.145147	0.244144	0.180325	Gpr17	1
GO:0010831	BP	GO:0010831	positive regulation of myotube differentiation	1/96	38/23328	0.145147	0.244144	0.180325	Cxcl12	1
GO:0030851	BP	GO:0030851	granulocyte differentiation	1/96	38/23328	0.145147	0.244144	0.180325	Cbfa2t3	1
GO:0045622	BP	GO:0045622	regulation of T-helper cell differentiation	1/96	38/23328	0.145147	0.244144	0.180325	Nfkbiz	1
GO:0045940	BP	GO:0045940	positive regulation of steroid metabolic process	1/96	38/23328	0.145147	0.244144	0.180325	Il1a	1
GO:0046627	BP	GO:0046627	negative regulation of insulin receptor signaling pathway	1/96	38/23328	0.145147	0.244144	0.180325	Socs3	1
GO:0051452	BP	GO:0051452	intracellular pH reduction	1/96	38/23328	0.145147	0.244144	0.180325	Avp	1
GO:0062208	BP	GO:0062208	positive regulation of pattern recognition receptor signaling pathway	1/96	38/23328	0.145147	0.244144	0.180325	Tlr2	1
GO:0072210	BP	GO:0072210	metanephric nephron development	1/96	38/23328	0.145147	0.244144	0.180325	Egr1	1
GO:0086065	BP	GO:0086065	cell communication involved in cardiac conduction	1/96	38/23328	0.145147	0.244144	0.180325	Pde4d	1
GO:0097028	BP	GO:0097028	dendritic cell differentiation	1/96	38/23328	0.145147	0.244144	0.180325	Cebpb	1
GO:0051235	BP	GO:0051235	maintenance of location	3/96	320/23328	0.145351	0.244311	0.180448	Pde4d/Uvrag/Lcn2	3
GO:0034249	BP	GO:0034249	negative regulation of cellular amide metabolic process	2/96	164/23328	0.146494	0.245878	0.181606	Zfp36l1/Zfp36	2
GO:0051224	BP	GO:0051224	negative regulation of protein transport	2/96	164/23328	0.146494	0.245878	0.181606	Csk/Bag3	2
GO:0019730	BP	GO:0019730	antimicrobial humoral response	2/96	165/23328	0.147914	0.246517	0.182078	Cxcl12/Cxcl1	2
GO:0051147	BP	GO:0051147	regulation of muscle cell differentiation	2/96	165/23328	0.147914	0.246517	0.182078	Cxcl12/Bdnf	2
GO:2001236	BP	GO:2001236	regulation of extrinsic apoptotic signaling pathway	2/96	165/23328	0.147914	0.246517	0.182078	Lmna/Atf3	2
GO:0006998	BP	GO:0006998	nuclear envelope organization	1/96	39/23328	0.148671	0.246517	0.182078	Lmna	1
GO:0009651	BP	GO:0009651	response to salt stress	1/96	39/23328	0.148671	0.246517	0.182078	Zfp36l1	1
GO:0010613	BP	GO:0010613	positive regulation of cardiac muscle hypertrophy	1/96	39/23328	0.148671	0.246517	0.182078	Mef2a	1
GO:0032735	BP	GO:0032735	positive regulation of interleukin-12 production	1/96	39/23328	0.148671	0.246517	0.182078	Tlr2	1
GO:0032781	BP	GO:0032781	positive regulation of ATPase activity	1/96	39/23328	0.148671	0.246517	0.182078	Dnajb1	1
GO:0042311	BP	GO:0042311	vasodilation	1/96	39/23328	0.148671	0.246517	0.182078	Gch1	1
GO:0042398	BP	GO:0042398	cellular modified amino acid biosynthetic process	1/96	39/23328	0.148671	0.246517	0.182078	Gch1	1
GO:0042554	BP	GO:0042554	superoxide anion generation	1/96	39/23328	0.148671	0.246517	0.182078	Cxcl1	1
GO:0060251	BP	GO:0060251	regulation of glial cell proliferation	1/96	39/23328	0.148671	0.246517	0.182078	Pmp22	1
GO:0072523	BP	GO:0072523	purine-containing compound catabolic process	1/96	39/23328	0.148671	0.246517	0.182078	Pde4d	1
GO:0090224	BP	GO:0090224	regulation of spindle organization	1/96	39/23328	0.148671	0.246517	0.182078	Hspa1a	1
GO:1900087	BP	GO:1900087	positive regulation of G1/S transition of mitotic cell cycle	1/96	39/23328	0.148671	0.246517	0.182078	Adamts1	1
GO:1902108	BP	GO:1902108	regulation of mitochondrial membrane permeability involved in apoptotic process	1/96	39/23328	0.148671	0.246517	0.182078	Ier3	1
GO:1905710	BP	GO:1905710	positive regulation of membrane permeability	1/96	39/23328	0.148671	0.246517	0.182078	Ier3	1
GO:0009150	BP	GO:0009150	purine ribonucleotide metabolic process	3/96	324/23328	0.1492	0.247219	0.182596	Cbfa2t3/Pde4d/Ier3	3
GO:0051100	BP	GO:0051100	negative regulation of binding	2/96	167/23328	0.150762	0.248121	0.183262	Jun/Cdkn1a	2
GO:0040013	BP	GO:0040013	negative regulation of locomotion	3/96	326/23328	0.151137	0.248121	0.183262	Cxcl12/Dusp1/Timp1	3
GO:0051271	BP	GO:0051271	negative regulation of cellular component movement	3/96	326/23328	0.151137	0.248121	0.183262	Cxcl12/Dusp1/Timp1	3
GO:0001562	BP	GO:0001562	response to protozoan	1/96	40/23328	0.15218	0.248121	0.183262	Ier3	1
GO:0009409	BP	GO:0009409	response to cold	1/96	40/23328	0.15218	0.248121	0.183262	Pmch	1
GO:0014046	BP	GO:0014046	dopamine secretion	1/96	40/23328	0.15218	0.248121	0.183262	Cxcl12	1
GO:0014059	BP	GO:0014059	regulation of dopamine secretion	1/96	40/23328	0.15218	0.248121	0.183262	Cxcl12	1
GO:0014742	BP	GO:0014742	positive regulation of muscle hypertrophy	1/96	40/23328	0.15218	0.248121	0.183262	Mef2a	1
GO:0015804	BP	GO:0015804	neutral amino acid transport	1/96	40/23328	0.15218	0.248121	0.183262	Slc38a5	1
GO:0030431	BP	GO:0030431	sleep	1/96	40/23328	0.15218	0.248121	0.183262	Pmch	1
GO:0035307	BP	GO:0035307	positive regulation of protein dephosphorylation	1/96	40/23328	0.15218	0.248121	0.183262	Ppp1r15a	1
GO:0038179	BP	GO:0038179	neurotrophin signaling pathway	1/96	40/23328	0.15218	0.248121	0.183262	Bdnf	1
GO:0043001	BP	GO:0043001	Golgi to plasma membrane protein transport	1/96	40/23328	0.15218	0.248121	0.183262	Csk	1
GO:0043551	BP	GO:0043551	regulation of phosphatidylinositol 3-kinase activity	1/96	40/23328	0.15218	0.248121	0.183262	Flt1	1
GO:0046006	BP	GO:0046006	regulation of activated T cell proliferation	1/96	40/23328	0.15218	0.248121	0.183262	Cd86	1
GO:0048520	BP	GO:0048520	positive regulation of behavior	1/96	40/23328	0.15218	0.248121	0.183262	Pmch	1
GO:0060325	BP	GO:0060325	face morphogenesis	1/96	40/23328	0.15218	0.248121	0.183262	Csrnp1	1
GO:0070884	BP	GO:0070884	regulation of calcineurin-NFAT signaling cascade	1/96	40/23328	0.15218	0.248121	0.183262	Rcan1	1
GO:0071542	BP	GO:0071542	dopaminergic neuron differentiation	1/96	40/23328	0.15218	0.248121	0.183262	Cxcl12	1
GO:0085029	BP	GO:0085029	extracellular matrix assembly	1/96	40/23328	0.15218	0.248121	0.183262	Ramp2	1
GO:0086004	BP	GO:0086004	regulation of cardiac muscle cell contraction	1/96	40/23328	0.15218	0.248121	0.183262	Pde4d	1
GO:1902692	BP	GO:1902692	regulation of neuroblast proliferation	1/96	40/23328	0.15218	0.248121	0.183262	Bdnf	1
GO:0046425	BP	GO:0046425	regulation of receptor signaling pathway via JAK-STAT	2/96	168/23328	0.152191	0.248121	0.183262	Osm/Socs3	2
GO:0007179	BP	GO:0007179	transforming growth factor beta receptor signaling pathway	2/96	169/23328	0.153622	0.249756	0.18447	Jun/Fos	2
GO:0035303	BP	GO:0035303	regulation of dephosphorylation	2/96	169/23328	0.153622	0.249756	0.18447	Ppp1r15a/Rcan1	2
GO:0071897	BP	GO:0071897	DNA biosynthetic process	2/96	169/23328	0.153622	0.249756	0.18447	Dusp1/Cdkn1a	2
GO:1904950	BP	GO:1904950	negative regulation of establishment of protein localization	2/96	169/23328	0.153622	0.249756	0.18447	Csk/Bag3	2
GO:0002429	BP	GO:0002429	immune response-activating cell surface receptor signaling pathway	3/96	330/23328	0.155036	0.251691	0.185899	Csk/Tlr2/Nfkbiz	3
GO:0048872	BP	GO:0048872	homeostasis of number of cells	3/96	330/23328	0.155036	0.251691	0.185899	Zfp36l1/Zfp36/Hba-a1	3
GO:0006953	BP	GO:0006953	acute-phase response	1/96	41/23328	0.155675	0.251691	0.185899	Il1a	1
GO:0008207	BP	GO:0008207	C21-steroid hormone metabolic process	1/96	41/23328	0.155675	0.251691	0.185899	Egr1	1
GO:0010737	BP	GO:0010737	protein kinase A signaling	1/96	41/23328	0.155675	0.251691	0.185899	Akap12	1
GO:0030225	BP	GO:0030225	macrophage differentiation	1/96	41/23328	0.155675	0.251691	0.185899	Tlr2	1
GO:0098801	BP	GO:0098801	regulation of renal system process	1/96	41/23328	0.155675	0.251691	0.185899	Avp	1
GO:0106056	BP	GO:0106056	regulation of calcineurin-mediated signaling	1/96	41/23328	0.155675	0.251691	0.185899	Rcan1	1
GO:0002757	BP	GO:0002757	immune response-activating signal transduction	3/96	331/23328	0.156016	0.252067	0.186177	Csk/Tlr2/Nfkbiz	3
GO:0045931	BP	GO:0045931	positive regulation of mitotic cell cycle	2/96	171/23328	0.156492	0.252661	0.186616	Adamts1/Il1a	2
GO:0072001	BP	GO:0072001	renal system development	3/96	333/23328	0.157981	0.25489	0.188262	Egr1/Bdnf/Adamts1	3
GO:0009259	BP	GO:0009259	ribonucleotide metabolic process	3/96	334/23328	0.158967	0.255196	0.188488	Cbfa2t3/Pde4d/Ier3	3
GO:0006509	BP	GO:0006509	membrane protein ectodomain proteolysis	1/96	42/23328	0.159156	0.255196	0.188488	Timp1	1
GO:0010762	BP	GO:0010762	regulation of fibroblast migration	1/96	42/23328	0.159156	0.255196	0.188488	Akap12	1
GO:0010765	BP	GO:0010765	positive regulation of sodium ion transport	1/96	42/23328	0.159156	0.255196	0.188488	Cxcl1	1
GO:0031062	BP	GO:0031062	positive regulation of histone methylation	1/96	42/23328	0.159156	0.255196	0.188488	Lmna	1
GO:0042417	BP	GO:0042417	dopamine metabolic process	1/96	42/23328	0.159156	0.255196	0.188488	Gch1	1
GO:0046825	BP	GO:0046825	regulation of protein export from nucleus	1/96	42/23328	0.159156	0.255196	0.188488	Bag3	1
GO:0051154	BP	GO:0051154	negative regulation of striated muscle cell differentiation	1/96	42/23328	0.159156	0.255196	0.188488	Bdnf	1
GO:1900077	BP	GO:1900077	negative regulation of cellular response to insulin stimulus	1/96	42/23328	0.159156	0.255196	0.188488	Socs3	1
GO:1904892	BP	GO:1904892	regulation of receptor signaling pathway via STAT	2/96	173/23328	0.159372	0.255368	0.188615	Osm/Socs3	2
GO:0015718	BP	GO:0015718	monocarboxylic acid transport	2/96	174/23328	0.160816	0.257505	0.190193	Slc38a5/Il1a	2
GO:0014003	BP	GO:0014003	oligodendrocyte development	1/96	43/23328	0.162622	0.259151	0.19141	Tlr2	1
GO:0042304	BP	GO:0042304	regulation of fatty acid biosynthetic process	1/96	43/23328	0.162622	0.259151	0.19141	Avp	1
GO:0042771	BP	GO:0042771	intrinsic apoptotic signaling pathway in response to DNA damage by p53 class mediator	1/96	43/23328	0.162622	0.259151	0.19141	Cdkn1a	1
GO:0045851	BP	GO:0045851	pH reduction	1/96	43/23328	0.162622	0.259151	0.19141	Avp	1
GO:0046326	BP	GO:0046326	positive regulation of glucose import	1/96	43/23328	0.162622	0.259151	0.19141	Mef2a	1
GO:0046854	BP	GO:0046854	phosphatidylinositol phosphorylation	1/96	43/23328	0.162622	0.259151	0.19141	Socs3	1
GO:0097484	BP	GO:0097484	dendrite extension	1/96	43/23328	0.162622	0.259151	0.19141	Bdnf	1
GO:0035296	BP	GO:0035296	regulation of tube diameter	2/96	176/23328	0.163711	0.260531	0.192429	Avp/Gch1	2
GO:0097746	BP	GO:0097746	regulation of blood vessel diameter	2/96	176/23328	0.163711	0.260531	0.192429	Avp/Gch1	2
GO:0035051	BP	GO:0035051	cardiocyte differentiation	2/96	177/23328	0.165163	0.262483	0.19387	Mef2a/Lmna	2
GO:0035150	BP	GO:0035150	regulation of tube size	2/96	177/23328	0.165163	0.262483	0.19387	Avp/Gch1	2
GO:0006890	BP	GO:0006890	retrograde vesicle-mediated transport, Golgi to endoplasmic reticulum	1/96	44/23328	0.166075	0.262501	0.193884	Uvrag	1
GO:0032350	BP	GO:0032350	regulation of hormone metabolic process	1/96	44/23328	0.166075	0.262501	0.193884	Egr1	1
GO:0044091	BP	GO:0044091	membrane biogenesis	1/96	44/23328	0.166075	0.262501	0.193884	Dmkn	1
GO:0045823	BP	GO:0045823	positive regulation of heart contraction	1/96	44/23328	0.166075	0.262501	0.193884	Gch1	1
GO:0048821	BP	GO:0048821	erythrocyte development	1/96	44/23328	0.166075	0.262501	0.193884	Hba-a1	1
GO:0097237	BP	GO:0097237	cellular response to toxic substance	1/96	44/23328	0.166075	0.262501	0.193884	Gch1	1
GO:1903523	BP	GO:1903523	negative regulation of blood circulation	1/96	44/23328	0.166075	0.262501	0.193884	Pde4d	1
GO:2000144	BP	GO:2000144	positive regulation of DNA-templated transcription, initiation	1/96	44/23328	0.166075	0.262501	0.193884	Jun	1
GO:0050821	BP	GO:0050821	protein stabilization	2/96	178/23328	0.166616	0.263179	0.194385	Bag3/Rassf1	2
GO:0002768	BP	GO:0002768	immune response-regulating cell surface receptor signaling pathway	3/96	342/23328	0.16692	0.26348	0.194607	Csk/Tlr2/Nfkbiz	3
GO:0007051	BP	GO:0007051	spindle organization	2/96	179/23328	0.168072	0.26512	0.195818	Uvrag/Hspa1a	2
GO:0001937	BP	GO:0001937	negative regulation of endothelial cell proliferation	1/96	45/23328	0.169513	0.265445	0.196058	Flt1	1
GO:0009166	BP	GO:0009166	nucleotide catabolic process	1/96	45/23328	0.169513	0.265445	0.196058	Pde4d	1
GO:0010464	BP	GO:0010464	regulation of mesenchymal cell proliferation	1/96	45/23328	0.169513	0.265445	0.196058	Lmna	1
GO:0030890	BP	GO:0030890	positive regulation of B cell proliferation	1/96	45/23328	0.169513	0.265445	0.196058	Cdkn1a	1
GO:0045923	BP	GO:0045923	positive regulation of fatty acid metabolic process	1/96	45/23328	0.169513	0.265445	0.196058	Avp	1
GO:0050918	BP	GO:0050918	positive chemotaxis	1/96	45/23328	0.169513	0.265445	0.196058	Cxcl12	1
GO:0051293	BP	GO:0051293	establishment of spindle localization	1/96	45/23328	0.169513	0.265445	0.196058	Cenpa	1
GO:0061756	BP	GO:0061756	leukocyte adhesion to vascular endothelial cell	1/96	45/23328	0.169513	0.265445	0.196058	Cxcl12	1
GO:0090184	BP	GO:0090184	positive regulation of kidney development	1/96	45/23328	0.169513	0.265445	0.196058	Egr1	1
GO:1901031	BP	GO:1901031	regulation of response to reactive oxygen species	1/96	45/23328	0.169513	0.265445	0.196058	Gch1	1
GO:0000075	BP	GO:0000075	cell cycle checkpoint	2/96	180/23328	0.16953	0.265445	0.196058	Cdkn1a/Ier3	2
GO:0002764	BP	GO:0002764	immune response-regulating signaling pathway	3/96	345/23328	0.169932	0.265718	0.19626	Csk/Tlr2/Nfkbiz	3
GO:0019693	BP	GO:0019693	ribose phosphate metabolic process	3/96	345/23328	0.169932	0.265718	0.19626	Cbfa2t3/Pde4d/Ier3	3
GO:0010951	BP	GO:0010951	negative regulation of endopeptidase activity	2/96	182/23328	0.172453	0.268081	0.198005	Avp/Timp1	2
GO:0048592	BP	GO:0048592	eye morphogenesis	2/96	182/23328	0.172453	0.268081	0.198005	Flt1/Bdnf	2
GO:0006576	BP	GO:0006576	cellular biogenic amine metabolic process	1/96	46/23328	0.172937	0.268081	0.198005	Sat1	1
GO:0006636	BP	GO:0006636	unsaturated fatty acid biosynthetic process	1/96	46/23328	0.172937	0.268081	0.198005	Avp	1
GO:0010259	BP	GO:0010259	multicellular organism aging	1/96	46/23328	0.172937	0.268081	0.198005	Pmp22	1
GO:0019228	BP	GO:0019228	neuronal action potential	1/96	46/23328	0.172937	0.268081	0.198005	Pmp22	1
GO:0030261	BP	GO:0030261	chromosome condensation	1/96	46/23328	0.172937	0.268081	0.198005	Phf13	1
GO:0045740	BP	GO:0045740	positive regulation of DNA replication	1/96	46/23328	0.172937	0.268081	0.198005	Jun	1
GO:0060323	BP	GO:0060323	head morphogenesis	1/96	46/23328	0.172937	0.268081	0.198005	Csrnp1	1
GO:0061647	BP	GO:0061647	histone H3-K9 modification	1/96	46/23328	0.172937	0.268081	0.198005	Lmna	1
GO:0090317	BP	GO:0090317	negative regulation of intracellular protein transport	1/96	46/23328	0.172937	0.268081	0.198005	Bag3	1
GO:1902667	BP	GO:1902667	regulation of axon guidance	1/96	46/23328	0.172937	0.268081	0.198005	Cxcl12	1
GO:2000404	BP	GO:2000404	regulation of T cell migration	1/96	46/23328	0.172937	0.268081	0.198005	Cxcl12	1
GO:0000082	BP	GO:0000082	G1/S transition of mitotic cell cycle	2/96	183/23328	0.173917	0.269421	0.198995	Cdkn1a/Adamts1	2
GO:0007265	BP	GO:0007265	Ras protein signal transduction	3/96	350/23328	0.174988	0.270901	0.200088	Gpr17/Jun/Rassf1	3
GO:0030534	BP	GO:0030534	adult behavior	2/96	184/23328	0.175384	0.271153	0.200274	Cxcl12/Pmp22	2
GO:2001235	BP	GO:2001235	positive regulation of apoptotic signaling pathway	2/96	184/23328	0.175384	0.271153	0.200274	Osm/Atf3	2
GO:0007628	BP	GO:0007628	adult walking behavior	1/96	47/23328	0.176347	0.271205	0.200313	Pmp22	1
GO:0042088	BP	GO:0042088	T-helper 1 type immune response	1/96	47/23328	0.176347	0.271205	0.200313	Gadd45g	1
GO:0043124	BP	GO:0043124	negative regulation of I-kappaB kinase/NF-kappaB signaling	1/96	47/23328	0.176347	0.271205	0.200313	Per1	1
GO:0048246	BP	GO:0048246	macrophage chemotaxis	1/96	47/23328	0.176347	0.271205	0.200313	Ccl3	1
GO:0050974	BP	GO:0050974	detection of mechanical stimulus involved in sensory perception	1/96	47/23328	0.176347	0.271205	0.200313	Cxcl12	1
GO:0051646	BP	GO:0051646	mitochondrion localization	1/96	47/23328	0.176347	0.271205	0.200313	Mef2a	1
GO:0060135	BP	GO:0060135	maternal process involved in female pregnancy	1/96	47/23328	0.176347	0.271205	0.200313	Junb	1
GO:0060964	BP	GO:0060964	regulation of gene silencing by miRNA	1/96	47/23328	0.176347	0.271205	0.200313	Zfp36	1
GO:0043122	BP	GO:0043122	regulation of I-kappaB kinase/NF-kappaB signaling	2/96	185/23328	0.176852	0.271623	0.200622	Per1/Il1a	2
GO:0048754	BP	GO:0048754	branching morphogenesis of an epithelial tube	2/96	185/23328	0.176852	0.271623	0.200622	Cxcl12/Flt1	2
GO:0034655	BP	GO:0034655	nucleobase-containing compound catabolic process	3/96	352/23328	0.177023	0.271707	0.200683	Zfp36l1/Pde4d/Zfp36	3
GO:0019098	BP	GO:0019098	reproductive behavior	1/96	48/23328	0.179744	0.273901	0.202304	Avp	1
GO:0022602	BP	GO:0022602	ovulation cycle process	1/96	48/23328	0.179744	0.273901	0.202304	Adamts1	1
GO:0030195	BP	GO:0030195	negative regulation of blood coagulation	1/96	48/23328	0.179744	0.273901	0.202304	Thbd	1
GO:0032965	BP	GO:0032965	regulation of collagen biosynthetic process	1/96	48/23328	0.179744	0.273901	0.202304	Errfi1	1
GO:0045429	BP	GO:0045429	positive regulation of nitric oxide biosynthetic process	1/96	48/23328	0.179744	0.273901	0.202304	Tlr2	1
GO:0045907	BP	GO:0045907	positive regulation of vasoconstriction	1/96	48/23328	0.179744	0.273901	0.202304	Avp	1
GO:0050798	BP	GO:0050798	activated T cell proliferation	1/96	48/23328	0.179744	0.273901	0.202304	Cd86	1
GO:0050850	BP	GO:0050850	positive regulation of calcium-mediated signaling	1/96	48/23328	0.179744	0.273901	0.202304	Ccl4	1
GO:1902622	BP	GO:1902622	regulation of neutrophil migration	1/96	48/23328	0.179744	0.273901	0.202304	Il1a	1
GO:1903115	BP	GO:1903115	regulation of actin filament-based movement	1/96	48/23328	0.179744	0.273901	0.202304	Pde4d	1
GO:1903727	BP	GO:1903727	positive regulation of phospholipid metabolic process	1/96	48/23328	0.179744	0.273901	0.202304	Flt1	1
GO:0010770	BP	GO:0010770	positive regulation of cell morphogenesis involved in differentiation	2/96	188/23328	0.18127	0.276046	0.203888	Cxcl12/Bdnf	2
GO:0002695	BP	GO:0002695	negative regulation of leukocyte activation	2/96	189/23328	0.182746	0.276527	0.204243	Cebpb/Cd86	2
GO:0061136	BP	GO:0061136	regulation of proteasomal protein catabolic process	2/96	189/23328	0.182746	0.276527	0.204243	Cbfa2t3/Hspa1a	2
GO:0006692	BP	GO:0006692	prostanoid metabolic process	1/96	49/23328	0.183126	0.276527	0.204243	Avp	1
GO:0006693	BP	GO:0006693	prostaglandin metabolic process	1/96	49/23328	0.183126	0.276527	0.204243	Avp	1
GO:0033173	BP	GO:0033173	calcineurin-NFAT signaling cascade	1/96	49/23328	0.183126	0.276527	0.204243	Rcan1	1
GO:0043550	BP	GO:0043550	regulation of lipid kinase activity	1/96	49/23328	0.183126	0.276527	0.204243	Flt1	1
GO:0048255	BP	GO:0048255	mRNA stabilization	1/96	49/23328	0.183126	0.276527	0.204243	Zfp36	1
GO:0090342	BP	GO:0090342	regulation of cell aging	1/96	49/23328	0.183126	0.276527	0.204243	Lmna	1
GO:0090659	BP	GO:0090659	walking behavior	1/96	49/23328	0.183126	0.276527	0.204243	Pmp22	1
GO:1900047	BP	GO:1900047	negative regulation of hemostasis	1/96	49/23328	0.183126	0.276527	0.204243	Thbd	1
GO:1902041	BP	GO:1902041	regulation of extrinsic apoptotic signaling pathway via death domain receptors	1/96	49/23328	0.183126	0.276527	0.204243	Atf3	1
GO:1902808	BP	GO:1902808	positive regulation of cell cycle G1/S phase transition	1/96	49/23328	0.183126	0.276527	0.204243	Adamts1	1
GO:1904407	BP	GO:1904407	positive regulation of nitric oxide metabolic process	1/96	49/23328	0.183126	0.276527	0.204243	Tlr2	1
GO:0007259	BP	GO:0007259	receptor signaling pathway via JAK-STAT	2/96	191/23328	0.185704	0.278906	0.206	Osm/Socs3	2
GO:0007520	BP	GO:0007520	myoblast fusion	1/96	50/23328	0.186495	0.278906	0.206	Cxcl12	1
GO:0008038	BP	GO:0008038	neuron recognition	1/96	50/23328	0.186495	0.278906	0.206	Bdnf	1
GO:0021545	BP	GO:0021545	cranial nerve development	1/96	50/23328	0.186495	0.278906	0.206	Egr2	1
GO:0032309	BP	GO:0032309	icosanoid secretion	1/96	50/23328	0.186495	0.278906	0.206	Il1a	1
GO:0032715	BP	GO:0032715	negative regulation of interleukin-6 production	1/96	50/23328	0.186495	0.278906	0.206	Csk	1
GO:0043392	BP	GO:0043392	negative regulation of DNA binding	1/96	50/23328	0.186495	0.278906	0.206	Jun	1
GO:0050819	BP	GO:0050819	negative regulation of coagulation	1/96	50/23328	0.186495	0.278906	0.206	Thbd	1
GO:0051653	BP	GO:0051653	spindle localization	1/96	50/23328	0.186495	0.278906	0.206	Cenpa	1
GO:0060147	BP	GO:0060147	regulation of posttranscriptional gene silencing	1/96	50/23328	0.186495	0.278906	0.206	Zfp36	1
GO:0060966	BP	GO:0060966	regulation of gene silencing by RNA	1/96	50/23328	0.186495	0.278906	0.206	Zfp36	1
GO:0070169	BP	GO:0070169	positive regulation of biomineral tissue development	1/96	50/23328	0.186495	0.278906	0.206	Cebpb	1
GO:0110151	BP	GO:0110151	positive regulation of biomineralization	1/96	50/23328	0.186495	0.278906	0.206	Cebpb	1
GO:1902475	BP	GO:1902475	L-alpha-amino acid transmembrane transport	1/96	50/23328	0.186495	0.278906	0.206	Slc38a5	1
GO:1903573	BP	GO:1903573	negative regulation of response to endoplasmic reticulum stress	1/96	50/23328	0.186495	0.278906	0.206	Ppp1r15a	1
GO:1990778	BP	GO:1990778	protein localization to cell periphery	3/96	363/23328	0.188329	0.281468	0.207893	Csk/Ramp2/Nptx2	3
GO:1903531	BP	GO:1903531	negative regulation of secretion by cell	2/96	193/23328	0.188669	0.281795	0.208134	Slc30a1/Osm	2
GO:0031663	BP	GO:0031663	lipopolysaccharide-mediated signaling pathway	1/96	51/23328	0.18985	0.282474	0.208636	Cd14	1
GO:0046189	BP	GO:0046189	phenol-containing compound biosynthetic process	1/96	51/23328	0.18985	0.282474	0.208636	Gch1	1
GO:0060428	BP	GO:0060428	lung epithelium development	1/96	51/23328	0.18985	0.282474	0.208636	Errfi1	1
GO:0060760	BP	GO:0060760	positive regulation of response to cytokine stimulus	1/96	51/23328	0.18985	0.282474	0.208636	Tlr2	1
GO:0071470	BP	GO:0071470	cellular response to osmotic stress	1/96	51/23328	0.18985	0.282474	0.208636	Zfp36l1	1
GO:2000142	BP	GO:2000142	regulation of DNA-templated transcription, initiation	1/96	51/23328	0.18985	0.282474	0.208636	Jun	1
GO:0050708	BP	GO:0050708	regulation of protein secretion	3/96	365/23328	0.190405	0.28294	0.20898	Tlr2/Il1a/Cd14	3
GO:0051961	BP	GO:0051961	negative regulation of nervous system development	3/96	365/23328	0.190405	0.28294	0.20898	Pmp22/Tlr2/Bdnf	3
GO:0006109	BP	GO:0006109	regulation of carbohydrate metabolic process	2/96	195/23328	0.19164	0.284183	0.209898	Cbfa2t3/Ier3	2
GO:0019933	BP	GO:0019933	cAMP-mediated signaling	2/96	195/23328	0.19164	0.284183	0.209898	Ramp2/Pde4d	2
GO:0043491	BP	GO:0043491	protein kinase B signaling	2/96	196/23328	0.193128	0.284183	0.209898	Zfp36l1/Osm	2
GO:0097696	BP	GO:0097696	receptor signaling pathway via STAT	2/96	196/23328	0.193128	0.284183	0.209898	Osm/Socs3	2
GO:0002888	BP	GO:0002888	positive regulation of myeloid leukocyte mediated immunity	1/96	52/23328	0.193191	0.284183	0.209898	Cxcl1	1
GO:0010828	BP	GO:0010828	positive regulation of glucose transmembrane transport	1/96	52/23328	0.193191	0.284183	0.209898	Mef2a	1
GO:0018023	BP	GO:0018023	peptidyl-lysine trimethylation	1/96	52/23328	0.193191	0.284183	0.209898	Lmna	1
GO:0030857	BP	GO:0030857	negative regulation of epithelial cell differentiation	1/96	52/23328	0.193191	0.284183	0.209898	Il1a	1
GO:0042307	BP	GO:0042307	positive regulation of protein import into nucleus	1/96	52/23328	0.193191	0.284183	0.209898	Bag3	1
GO:0043268	BP	GO:0043268	positive regulation of potassium ion transport	1/96	52/23328	0.193191	0.284183	0.209898	Cxcl1	1
GO:0045124	BP	GO:0045124	regulation of bone resorption	1/96	52/23328	0.193191	0.284183	0.209898	Csk	1
GO:0048483	BP	GO:0048483	autonomic nervous system development	1/96	52/23328	0.193191	0.284183	0.209898	Egr2	1
GO:0051353	BP	GO:0051353	positive regulation of oxidoreductase activity	1/96	52/23328	0.193191	0.284183	0.209898	Gch1	1
GO:0140353	BP	GO:0140353	lipid export from cell	1/96	52/23328	0.193191	0.284183	0.209898	Il1a	1
GO:1900015	BP	GO:1900015	regulation of cytokine production involved in inflammatory response	1/96	52/23328	0.193191	0.284183	0.209898	Per1	1
GO:1904036	BP	GO:1904036	negative regulation of epithelial cell apoptotic process	1/96	52/23328	0.193191	0.284183	0.209898	Ramp2	1
GO:0007178	BP	GO:0007178	transmembrane receptor protein serine/threonine kinase signaling pathway	3/96	368/23328	0.19353	0.284503	0.210134	Jun/Egr1/Fos	3
GO:0043010	BP	GO:0043010	camera-type eye development	3/96	370/23328	0.195621	0.286728	0.211778	Flt1/Jun/Slc25a25	3
GO:1990138	BP	GO:1990138	neuron projection extension	2/96	198/23328	0.19611	0.286728	0.211778	Cxcl12/Bdnf	2
GO:0001662	BP	GO:0001662	behavioral fear response	1/96	53/23328	0.196519	0.286728	0.211778	Bdnf	1
GO:0006360	BP	GO:0006360	transcription by RNA polymerase I	1/96	53/23328	0.196519	0.286728	0.211778	Ppp1r15a	1
GO:0031103	BP	GO:0031103	axon regeneration	1/96	53/23328	0.196519	0.286728	0.211778	Jun	1
GO:0032648	BP	GO:0032648	regulation of interferon-beta production	1/96	53/23328	0.196519	0.286728	0.211778	Tlr2	1
GO:0046902	BP	GO:0046902	regulation of mitochondrial membrane permeability	1/96	53/23328	0.196519	0.286728	0.211778	Ier3	1
GO:0048662	BP	GO:0048662	negative regulation of smooth muscle cell proliferation	1/96	53/23328	0.196519	0.286728	0.211778	Cdkn1a	1
GO:0048713	BP	GO:0048713	regulation of oligodendrocyte differentiation	1/96	53/23328	0.196519	0.286728	0.211778	Tlr2	1
GO:0051955	BP	GO:0051955	regulation of amino acid transport	1/96	53/23328	0.196519	0.286728	0.211778	Avp	1
GO:0061383	BP	GO:0061383	trabecula morphogenesis	1/96	53/23328	0.196519	0.286728	0.211778	Adamts1	1
GO:0097720	BP	GO:0097720	calcineurin-mediated signaling	1/96	53/23328	0.196519	0.286728	0.211778	Rcan1	1
GO:0030308	BP	GO:0030308	negative regulation of cell growth	2/96	199/23328	0.197602	0.288117	0.212804	Cdkn1a/Sertad1	2
GO:0010976	BP	GO:0010976	positive regulation of neuron projection development	3/96	372/23328	0.197718	0.288117	0.212804	Cxcl12/Bdnf/Adamts1	3
GO:0006839	BP	GO:0006839	mitochondrial transport	2/96	200/23328	0.199096	0.289751	0.214011	Bag3/Ier3	2
GO:0051099	BP	GO:0051099	positive regulation of binding	2/96	200/23328	0.199096	0.289751	0.214011	Ramp2/Bdnf	2
GO:0002209	BP	GO:0002209	behavioral defense response	1/96	54/23328	0.199833	0.289751	0.214011	Bdnf	1
GO:0014009	BP	GO:0014009	glial cell proliferation	1/96	54/23328	0.199833	0.289751	0.214011	Pmp22	1
GO:0042743	BP	GO:0042743	hydrogen peroxide metabolic process	1/96	54/23328	0.199833	0.289751	0.214011	Hba-a1	1
GO:0046456	BP	GO:0046456	icosanoid biosynthetic process	1/96	54/23328	0.199833	0.289751	0.214011	Avp	1
GO:0046834	BP	GO:0046834	lipid phosphorylation	1/96	54/23328	0.199833	0.289751	0.214011	Socs3	1
GO:0070542	BP	GO:0070542	response to fatty acid	1/96	54/23328	0.199833	0.289751	0.214011	Tlr2	1
GO:0032869	BP	GO:0032869	cellular response to insulin stimulus	2/96	201/23328	0.200592	0.290311	0.214424	Zfp36l1/Socs3	2
GO:0044843	BP	GO:0044843	cell cycle G1/S phase transition	2/96	201/23328	0.200592	0.290311	0.214424	Cdkn1a/Adamts1	2
GO:0070507	BP	GO:0070507	regulation of microtubule cytoskeleton organization	2/96	201/23328	0.200592	0.290311	0.214424	Rassf1/Hspa1a	2
GO:0001655	BP	GO:0001655	urogenital system development	3/96	376/23328	0.201927	0.291637	0.215404	Egr1/Bdnf/Adamts1	3
GO:0002534	BP	GO:0002534	cytokine production involved in inflammatory response	1/96	55/23328	0.203133	0.291637	0.215404	Per1	1
GO:0002720	BP	GO:0002720	positive regulation of cytokine production involved in immune response	1/96	55/23328	0.203133	0.291637	0.215404	Tlr2	1
GO:0006826	BP	GO:0006826	iron ion transport	1/96	55/23328	0.203133	0.291637	0.215404	Lcn2	1
GO:0010712	BP	GO:0010712	regulation of collagen metabolic process	1/96	55/23328	0.203133	0.291637	0.215404	Errfi1	1
GO:0032608	BP	GO:0032608	interferon-beta production	1/96	55/23328	0.203133	0.291637	0.215404	Tlr2	1
GO:0033619	BP	GO:0033619	membrane protein proteolysis	1/96	55/23328	0.203133	0.291637	0.215404	Timp1	1
GO:0035306	BP	GO:0035306	positive regulation of dephosphorylation	1/96	55/23328	0.203133	0.291637	0.215404	Ppp1r15a	1
GO:0042531	BP	GO:0042531	positive regulation of tyrosine phosphorylation of STAT protein	1/96	55/23328	0.203133	0.291637	0.215404	Osm	1
GO:0045773	BP	GO:0045773	positive regulation of axon extension	1/96	55/23328	0.203133	0.291637	0.215404	Cxcl12	1
GO:0050891	BP	GO:0050891	multicellular organismal water homeostasis	1/96	55/23328	0.203133	0.291637	0.215404	Avp	1
GO:0050922	BP	GO:0050922	negative regulation of chemotaxis	1/96	55/23328	0.203133	0.291637	0.215404	Dusp1	1
GO:2000351	BP	GO:2000351	regulation of endothelial cell apoptotic process	1/96	55/23328	0.203133	0.291637	0.215404	Ramp2	1
GO:0002285	BP	GO:0002285	lymphocyte activation involved in immune response	2/96	203/23328	0.203587	0.291929	0.21562	Nfkbiz/Gadd45g	2
GO:0009743	BP	GO:0009743	response to carbohydrate	2/96	203/23328	0.203587	0.291929	0.21562	Zfp36l1/Egr1	2
GO:0015872	BP	GO:0015872	dopamine transport	1/96	56/23328	0.20642	0.294364	0.217417	Cxcl12	1
GO:0042446	BP	GO:0042446	hormone biosynthetic process	1/96	56/23328	0.20642	0.294364	0.217417	Egr1	1
GO:0045599	BP	GO:0045599	negative regulation of fat cell differentiation	1/96	56/23328	0.20642	0.294364	0.217417	Runx1t1	1
GO:0045777	BP	GO:0045777	positive regulation of blood pressure	1/96	56/23328	0.20642	0.294364	0.217417	Avp	1
GO:0050873	BP	GO:0050873	brown fat cell differentiation	1/96	56/23328	0.20642	0.294364	0.217417	Cebpb	1
GO:0051930	BP	GO:0051930	regulation of sensory perception of pain	1/96	56/23328	0.20642	0.294364	0.217417	Il1a	1
GO:0071715	BP	GO:0071715	icosanoid transport	1/96	56/23328	0.20642	0.294364	0.217417	Il1a	1
GO:1901571	BP	GO:1901571	fatty acid derivative transport	1/96	56/23328	0.20642	0.294364	0.217417	Il1a	1
GO:1903533	BP	GO:1903533	regulation of protein targeting	1/96	56/23328	0.20642	0.294364	0.217417	Bag3	1
GO:0030522	BP	GO:0030522	intracellular receptor signaling pathway	2/96	207/23328	0.209593	0.296854	0.219257	Per1/Bdnf	2
GO:0006584	BP	GO:0006584	catecholamine metabolic process	1/96	57/23328	0.209694	0.296854	0.219257	Gch1	1
GO:0009712	BP	GO:0009712	catechol-containing compound metabolic process	1/96	57/23328	0.209694	0.296854	0.219257	Gch1	1
GO:0010463	BP	GO:0010463	mesenchymal cell proliferation	1/96	57/23328	0.209694	0.296854	0.219257	Lmna	1
GO:0032964	BP	GO:0032964	collagen biosynthetic process	1/96	57/23328	0.209694	0.296854	0.219257	Errfi1	1
GO:0042775	BP	GO:0042775	mitochondrial ATP synthesis coupled electron transport	1/96	57/23328	0.209694	0.296854	0.219257	Bdnf	1
GO:0043489	BP	GO:0043489	RNA stabilization	1/96	57/23328	0.209694	0.296854	0.219257	Zfp36	1
GO:0051931	BP	GO:0051931	regulation of sensory perception	1/96	57/23328	0.209694	0.296854	0.219257	Il1a	1
GO:0055078	BP	GO:0055078	sodium ion homeostasis	1/96	57/23328	0.209694	0.296854	0.219257	Avp	1
GO:1901292	BP	GO:1901292	nucleoside phosphate catabolic process	1/96	57/23328	0.209694	0.296854	0.219257	Pde4d	1
GO:1902373	BP	GO:1902373	negative regulation of mRNA catabolic process	1/96	57/23328	0.209694	0.296854	0.219257	Zfp36	1
GO:2000648	BP	GO:2000648	positive regulation of stem cell proliferation	1/96	57/23328	0.209694	0.296854	0.219257	Cxcl1	1
GO:0050679	BP	GO:0050679	positive regulation of epithelial cell proliferation	2/96	208/23328	0.211098	0.298479	0.220457	Cxcl12/Jun	2
GO:0050770	BP	GO:0050770	regulation of axonogenesis	2/96	208/23328	0.211098	0.298479	0.220457	Cxcl12/Bdnf	2
GO:0001825	BP	GO:0001825	blastocyst formation	1/96	58/23328	0.212954	0.29911	0.220923	Junb	1
GO:0010656	BP	GO:0010656	negative regulation of muscle cell apoptotic process	1/96	58/23328	0.212954	0.29911	0.220923	Bag3	1
GO:0010662	BP	GO:0010662	regulation of striated muscle cell apoptotic process	1/96	58/23328	0.212954	0.29911	0.220923	Bag3	1
GO:0032655	BP	GO:0032655	regulation of interleukin-12 production	1/96	58/23328	0.212954	0.29911	0.220923	Tlr2	1
GO:0035690	BP	GO:0035690	cellular response to drug	1/96	58/23328	0.212954	0.29911	0.220923	Ccl4	1
GO:0042596	BP	GO:0042596	fear response	1/96	58/23328	0.212954	0.29911	0.220923	Bdnf	1
GO:0045071	BP	GO:0045071	negative regulation of viral genome replication	1/96	58/23328	0.212954	0.29911	0.220923	Oasl2	1
GO:0048016	BP	GO:0048016	inositol phosphate-mediated signaling	1/96	58/23328	0.212954	0.29911	0.220923	Rcan1	1
GO:0051445	BP	GO:0051445	regulation of meiotic cell cycle	1/96	58/23328	0.212954	0.29911	0.220923	Osm	1
GO:0072577	BP	GO:0072577	endothelial cell apoptotic process	1/96	58/23328	0.212954	0.29911	0.220923	Ramp2	1
GO:1904591	BP	GO:1904591	positive regulation of protein import	1/96	58/23328	0.212954	0.29911	0.220923	Bag3	1
GO:0010721	BP	GO:0010721	negative regulation of cell development	3/96	387/23328	0.213611	0.299853	0.221472	Pmp22/Bdnf/Il1a	3
GO:0050866	BP	GO:0050866	negative regulation of cell activation	2/96	210/23328	0.21411	0.300372	0.221855	Cebpb/Cd86	2
GO:0007528	BP	GO:0007528	neuromuscular junction development	1/96	59/23328	0.216201	0.302396	0.223351	Pmp22	1
GO:0007588	BP	GO:0007588	excretion	1/96	59/23328	0.216201	0.302396	0.223351	Avp	1
GO:0042551	BP	GO:0042551	neuron maturation	1/96	59/23328	0.216201	0.302396	0.223351	Pmp22	1
GO:0043462	BP	GO:0043462	regulation of ATPase activity	1/96	59/23328	0.216201	0.302396	0.223351	Dnajb1	1
GO:1903539	BP	GO:1903539	protein localization to postsynaptic membrane	1/96	59/23328	0.216201	0.302396	0.223351	Nptx2	1
GO:0043112	BP	GO:0043112	receptor metabolic process	2/96	212/23328	0.217126	0.303327	0.224038	Ramp2/Uvrag	2
GO:0097305	BP	GO:0097305	response to alcohol	2/96	212/23328	0.217126	0.303327	0.224038	Ccl7/Npas4	2
GO:0044270	BP	GO:0044270	cellular nitrogen compound catabolic process	3/96	391/23328	0.217897	0.304221	0.224699	Zfp36l1/Pde4d/Zfp36	3
GO:0008361	BP	GO:0008361	regulation of cell size	2/96	213/23328	0.218636	0.304909	0.225206	Cxcl12/Bdnf	2
GO:0006303	BP	GO:0006303	double-strand break repair via nonhomologous end joining	1/96	60/23328	0.219435	0.304909	0.225206	Uvrag	1
GO:0060324	BP	GO:0060324	face development	1/96	60/23328	0.219435	0.304909	0.225206	Csrnp1	1
GO:0072678	BP	GO:0072678	T cell migration	1/96	60/23328	0.219435	0.304909	0.225206	Cxcl12	1
GO:0090183	BP	GO:0090183	regulation of kidney development	1/96	60/23328	0.219435	0.304909	0.225206	Egr1	1
GO:1905517	BP	GO:1905517	macrophage migration	1/96	60/23328	0.219435	0.304909	0.225206	Ccl3	1
GO:2000134	BP	GO:2000134	negative regulation of G1/S transition of mitotic cell cycle	1/96	60/23328	0.219435	0.304909	0.225206	Cdkn1a	1
GO:2001238	BP	GO:2001238	positive regulation of extrinsic apoptotic signaling pathway	1/96	60/23328	0.219435	0.304909	0.225206	Atf3	1
GO:1901888	BP	GO:1901888	regulation of cell junction assembly	2/96	215/23328	0.221658	0.307814	0.227352	Tlr2/Bdnf	2
GO:0006446	BP	GO:0006446	regulation of translational initiation	1/96	61/23328	0.222655	0.307916	0.227428	Ppp1r15a	1
GO:0006893	BP	GO:0006893	Golgi to plasma membrane transport	1/96	61/23328	0.222655	0.307916	0.227428	Csk	1
GO:0031124	BP	GO:0031124	mRNA 3'-end processing	1/96	61/23328	0.222655	0.307916	0.227428	Zfp36l1	1
GO:0031641	BP	GO:0031641	regulation of myelination	1/96	61/23328	0.222655	0.307916	0.227428	Egr2	1
GO:0032615	BP	GO:0032615	interleukin-12 production	1/96	61/23328	0.222655	0.307916	0.227428	Tlr2	1
GO:0042773	BP	GO:0042773	ATP synthesis coupled electron transport	1/96	61/23328	0.222655	0.307916	0.227428	Bdnf	1
GO:0048286	BP	GO:0048286	lung alveolus development	1/96	61/23328	0.222655	0.307916	0.227428	Errfi1	1
GO:0046700	BP	GO:0046700	heterocycle catabolic process	3/96	397/23328	0.22436	0.309781	0.228805	Zfp36l1/Pde4d/Zfp36	3
GO:0006402	BP	GO:0006402	mRNA catabolic process	2/96	217/23328	0.224684	0.309781	0.228805	Zfp36l1/Zfp36	2
GO:0048639	BP	GO:0048639	positive regulation of developmental growth	2/96	217/23328	0.224684	0.309781	0.228805	Cxcl12/Bdnf	2
GO:0010171	BP	GO:0010171	body morphogenesis	1/96	62/23328	0.225863	0.309781	0.228805	Csrnp1	1
GO:0010658	BP	GO:0010658	striated muscle cell apoptotic process	1/96	62/23328	0.225863	0.309781	0.228805	Bag3	1
GO:0030330	BP	GO:0030330	DNA damage response, signal transduction by p53 class mediator	1/96	62/23328	0.225863	0.309781	0.228805	Cdkn1a	1
GO:0031102	BP	GO:0031102	neuron projection regeneration	1/96	62/23328	0.225863	0.309781	0.228805	Jun	1
GO:0032387	BP	GO:0032387	negative regulation of intracellular transport	1/96	62/23328	0.225863	0.309781	0.228805	Bag3	1
GO:0032835	BP	GO:0032835	glomerulus development	1/96	62/23328	0.225863	0.309781	0.228805	Egr1	1
GO:0043966	BP	GO:0043966	histone H3 acetylation	1/96	62/23328	0.225863	0.309781	0.228805	Per1	1
GO:0046850	BP	GO:0046850	regulation of bone remodeling	1/96	62/23328	0.225863	0.309781	0.228805	Csk	1
GO:0050982	BP	GO:0050982	detection of mechanical stimulus	1/96	62/23328	0.225863	0.309781	0.228805	Cxcl12	1
GO:0051148	BP	GO:0051148	negative regulation of muscle cell differentiation	1/96	62/23328	0.225863	0.309781	0.228805	Bdnf	1
GO:0051926	BP	GO:0051926	negative regulation of calcium ion transport	1/96	62/23328	0.225863	0.309781	0.228805	Slc30a1	1
GO:0007188	BP	GO:0007188	adenylate cyclase-modulating G protein-coupled receptor signaling pathway	2/96	219/23328	0.227713	0.312135	0.230544	Ramp2/Akap12	2
GO:0030104	BP	GO:0030104	water homeostasis	1/96	63/23328	0.229057	0.313241	0.231361	Avp	1
GO:0045661	BP	GO:0045661	regulation of myoblast differentiation	1/96	63/23328	0.229057	0.313241	0.231361	Zfp36l1	1
GO:0071260	BP	GO:0071260	cellular response to mechanical stimulus	1/96	63/23328	0.229057	0.313241	0.231361	Bag3	1
GO:1903428	BP	GO:1903428	positive regulation of reactive oxygen species biosynthetic process	1/96	63/23328	0.229057	0.313241	0.231361	Tlr2	1
GO:0019058	BP	GO:0019058	viral life cycle	2/96	221/23328	0.230745	0.31518	0.232793	Oasl2/Uvrag	2
GO:1903050	BP	GO:1903050	regulation of proteolysis involved in cellular protein catabolic process	2/96	221/23328	0.230745	0.31518	0.232793	Cbfa2t3/Hspa1a	2
GO:0006879	BP	GO:0006879	cellular iron ion homeostasis	1/96	64/23328	0.232238	0.31559	0.233095	Lcn2	1
GO:0046173	BP	GO:0046173	polyol biosynthetic process	1/96	64/23328	0.232238	0.31559	0.233095	Gch1	1
GO:0048008	BP	GO:0048008	platelet-derived growth factor receptor signaling pathway	1/96	64/23328	0.232238	0.31559	0.233095	Csrnp1	1
GO:0051784	BP	GO:0051784	negative regulation of nuclear division	1/96	64/23328	0.232238	0.31559	0.233095	Osm	1
GO:0061951	BP	GO:0061951	establishment of protein localization to plasma membrane	1/96	64/23328	0.232238	0.31559	0.233095	Csk	1
GO:0062237	BP	GO:0062237	protein localization to postsynapse	1/96	64/23328	0.232238	0.31559	0.233095	Nptx2	1
GO:0070059	BP	GO:0070059	intrinsic apoptotic signaling pathway in response to endoplasmic reticulum stress	1/96	64/23328	0.232238	0.31559	0.233095	Cebpb	1
GO:1902807	BP	GO:1902807	negative regulation of cell cycle G1/S phase transition	1/96	64/23328	0.232238	0.31559	0.233095	Cdkn1a	1
GO:2001020	BP	GO:2001020	regulation of response to DNA damage stimulus	2/96	222/23328	0.232262	0.31559	0.233095	Cxcl12/Ier3	2
GO:0043161	BP	GO:0043161	proteasome-mediated ubiquitin-dependent protein catabolic process	3/96	405/23328	0.233036	0.316273	0.2336	Cbfa2t3/Pmp22/Hspa1a	3
GO:0051346	BP	GO:0051346	negative regulation of hydrolase activity	3/96	405/23328	0.233036	0.316273	0.2336	Avp/Ppp1r15a/Timp1	3
GO:0007163	BP	GO:0007163	establishment or maintenance of cell polarity	2/96	223/23328	0.23378	0.31673	0.233937	Lmna/Cenpa	2
GO:0019935	BP	GO:0019935	cyclic-nucleotide-mediated signaling	2/96	223/23328	0.23378	0.31673	0.233937	Ramp2/Pde4d	2
GO:0051048	BP	GO:0051048	negative regulation of secretion	2/96	223/23328	0.23378	0.31673	0.233937	Slc30a1/Osm	2
GO:0002791	BP	GO:0002791	regulation of peptide secretion	3/96	406/23328	0.234125	0.317013	0.234146	Tlr2/Il1a/Cd14	3
GO:0015807	BP	GO:0015807	L-amino acid transport	1/96	65/23328	0.235406	0.317826	0.234747	Slc38a5	1
GO:0034121	BP	GO:0034121	regulation of toll-like receptor signaling pathway	1/96	65/23328	0.235406	0.317826	0.234747	Tlr2	1
GO:0042246	BP	GO:0042246	tissue regeneration	1/96	65/23328	0.235406	0.317826	0.234747	Cdkn1a	1
GO:0045840	BP	GO:0045840	positive regulation of mitotic nuclear division	1/96	65/23328	0.235406	0.317826	0.234747	Il1a	1
GO:0090398	BP	GO:0090398	cellular senescence	1/96	65/23328	0.235406	0.317826	0.234747	Cdkn1a	1
GO:0032970	BP	GO:0032970	regulation of actin filament-based process	3/96	410/23328	0.23849	0.320971	0.23707	Pde4d/Tlr2/Il1a	3
GO:0043967	BP	GO:0043967	histone H4 acetylation	1/96	66/23328	0.238562	0.320971	0.23707	Per1	1
GO:0050433	BP	GO:0050433	regulation of catecholamine secretion	1/96	66/23328	0.238562	0.320971	0.23707	Cxcl12	1
GO:0070972	BP	GO:0070972	protein localization to endoplasmic reticulum	1/96	66/23328	0.238562	0.320971	0.23707	Ppp1r15a	1
GO:0090559	BP	GO:0090559	regulation of membrane permeability	1/96	66/23328	0.238562	0.320971	0.23707	Ier3	1
GO:0097006	BP	GO:0097006	regulation of plasma lipoprotein particle levels	1/96	66/23328	0.238562	0.320971	0.23707	Csk	1
GO:0019439	BP	GO:0019439	aromatic compound catabolic process	3/96	411/23328	0.239584	0.322161	0.237948	Zfp36l1/Pde4d/Zfp36	3
GO:0000726	BP	GO:0000726	non-recombinational repair	1/96	67/23328	0.241704	0.323706	0.23909	Uvrag	1
GO:0000768	BP	GO:0000768	syncytium formation by plasma membrane fusion	1/96	67/23328	0.241704	0.323706	0.23909	Cxcl12	1
GO:0030239	BP	GO:0030239	myofibril assembly	1/96	67/23328	0.241704	0.323706	0.23909	Mef2a	1
GO:0086003	BP	GO:0086003	cardiac muscle cell contraction	1/96	67/23328	0.241704	0.323706	0.23909	Pde4d	1
GO:0090307	BP	GO:0090307	mitotic spindle assembly	1/96	67/23328	0.241704	0.323706	0.23909	Hspa1a	1
GO:0140253	BP	GO:0140253	cell-cell fusion	1/96	67/23328	0.241704	0.323706	0.23909	Cxcl12	1
GO:1901570	BP	GO:1901570	fatty acid derivative biosynthetic process	1/96	67/23328	0.241704	0.323706	0.23909	Avp	1
GO:0007566	BP	GO:0007566	embryo implantation	1/96	68/23328	0.244834	0.325654	0.240528	Timp1	1
GO:0022029	BP	GO:0022029	telencephalon cell migration	1/96	68/23328	0.244834	0.325654	0.240528	Cxcl12	1
GO:0030032	BP	GO:0030032	lamellipodium assembly	1/96	68/23328	0.244834	0.325654	0.240528	Pmp22	1
GO:0030837	BP	GO:0030837	negative regulation of actin filament polymerization	1/96	68/23328	0.244834	0.325654	0.240528	Tlr2	1
GO:0043949	BP	GO:0043949	regulation of cAMP-mediated signaling	1/96	68/23328	0.244834	0.325654	0.240528	Pde4d	1
GO:0046324	BP	GO:0046324	regulation of glucose import	1/96	68/23328	0.244834	0.325654	0.240528	Mef2a	1
GO:0046579	BP	GO:0046579	positive regulation of Ras protein signal transduction	1/96	68/23328	0.244834	0.325654	0.240528	Gpr17	1
GO:0050432	BP	GO:0050432	catecholamine secretion	1/96	68/23328	0.244834	0.325654	0.240528	Cxcl12	1
GO:0071868	BP	GO:0071868	cellular response to monoamine stimulus	1/96	68/23328	0.244834	0.325654	0.240528	Pde4d	1
GO:0071870	BP	GO:0071870	cellular response to catecholamine stimulus	1/96	68/23328	0.244834	0.325654	0.240528	Pde4d	1
GO:0099601	BP	GO:0099601	regulation of neurotransmitter receptor activity	1/96	68/23328	0.244834	0.325654	0.240528	Nptx2	1
GO:1902369	BP	GO:1902369	negative regulation of RNA catabolic process	1/96	68/23328	0.244834	0.325654	0.240528	Zfp36	1
GO:0002253	BP	GO:0002253	activation of immune response	3/96	416/23328	0.245065	0.325776	0.240618	Csk/Tlr2/Nfkbiz	3
GO:0002274	BP	GO:0002274	myeloid leukocyte activation	2/96	231/23328	0.245942	0.326756	0.241343	Jun/Tlr2	2
GO:0042113	BP	GO:0042113	B cell activation	3/96	417/23328	0.246164	0.326864	0.241422	Zfp36l1/Cdkn1a/Cd86	3
GO:0000281	BP	GO:0000281	mitotic cytokinesis	1/96	69/23328	0.24795	0.32793	0.242209	Cenpa	1
GO:0001913	BP	GO:0001913	T cell mediated cytotoxicity	1/96	69/23328	0.24795	0.32793	0.242209	Prf1	1
GO:0006949	BP	GO:0006949	syncytium formation	1/96	69/23328	0.24795	0.32793	0.242209	Cxcl12	1
GO:0045428	BP	GO:0045428	regulation of nitric oxide biosynthetic process	1/96	69/23328	0.24795	0.32793	0.242209	Tlr2	1
GO:0048678	BP	GO:0048678	response to axon injury	1/96	69/23328	0.24795	0.32793	0.242209	Jun	1
GO:0071867	BP	GO:0071867	response to monoamine	1/96	69/23328	0.24795	0.32793	0.242209	Pde4d	1
GO:0071869	BP	GO:0071869	response to catecholamine	1/96	69/23328	0.24795	0.32793	0.242209	Pde4d	1
GO:0006814	BP	GO:0006814	sodium ion transport	2/96	234/23328	0.250511	0.330909	0.24441	Per1/Cxcl1	2
GO:0001541	BP	GO:0001541	ovarian follicle development	1/96	70/23328	0.251054	0.330909	0.24441	Cebpb	1
GO:0007405	BP	GO:0007405	neuroblast proliferation	1/96	70/23328	0.251054	0.330909	0.24441	Bdnf	1
GO:0030888	BP	GO:0030888	regulation of B cell proliferation	1/96	70/23328	0.251054	0.330909	0.24441	Cdkn1a	1
GO:0055117	BP	GO:0055117	regulation of cardiac muscle contraction	1/96	70/23328	0.251054	0.330909	0.24441	Pde4d	1
GO:2000107	BP	GO:2000107	negative regulation of leukocyte apoptotic process	1/96	70/23328	0.251054	0.330909	0.24441	Cxcl12	1
GO:0002437	BP	GO:0002437	inflammatory response to antigenic stimulus	1/96	71/23328	0.254146	0.334606	0.247141	Gpr17	1
GO:0021885	BP	GO:0021885	forebrain cell migration	1/96	71/23328	0.254146	0.334606	0.247141	Cxcl12	1
GO:0072594	BP	GO:0072594	establishment of protein localization to organelle	3/96	426/23328	0.256087	0.336972	0.248888	Lmna/Bag3/Cdkn1a	3
GO:0007193	BP	GO:0007193	adenylate cyclase-inhibiting G protein-coupled receptor signaling pathway	1/96	72/23328	0.257224	0.337897	0.249571	Akap12	1
GO:0051453	BP	GO:0051453	regulation of intracellular pH	1/96	72/23328	0.257224	0.337897	0.249571	Avp	1
GO:0061045	BP	GO:0061045	negative regulation of wound healing	1/96	72/23328	0.257224	0.337897	0.249571	Thbd	1
GO:0006898	BP	GO:0006898	receptor-mediated endocytosis	2/96	240/23328	0.259655	0.340706	0.251646	Ramp2/Cd14	2
GO:1903320	BP	GO:1903320	regulation of protein modification by small protein conjugation or removal	2/96	240/23328	0.259655	0.340706	0.251646	Rassf1/Egr1	2
GO:0002886	BP	GO:0002886	regulation of myeloid leukocyte mediated immunity	1/96	73/23328	0.260291	0.340773	0.251696	Cxcl1	1
GO:0009988	BP	GO:0009988	cell-cell recognition	1/96	73/23328	0.260291	0.340773	0.251696	Prf1	1
GO:0051155	BP	GO:0051155	positive regulation of striated muscle cell differentiation	1/96	73/23328	0.260291	0.340773	0.251696	Cxcl12	1
GO:0097120	BP	GO:0097120	receptor localization to synapse	1/96	73/23328	0.260291	0.340773	0.251696	Nptx2	1
GO:0006626	BP	GO:0006626	protein targeting to mitochondrion	1/96	74/23328	0.263344	0.343806	0.253936	Bag3	1
GO:0009060	BP	GO:0009060	aerobic respiration	1/96	74/23328	0.263344	0.343806	0.253936	Cbfa2t3	1
GO:0034404	BP	GO:0034404	nucleobase-containing small molecule biosynthetic process	1/96	74/23328	0.263344	0.343806	0.253936	Pde4d	1
GO:0046824	BP	GO:0046824	positive regulation of nucleocytoplasmic transport	1/96	74/23328	0.263344	0.343806	0.253936	Bag3	1
GO:2001021	BP	GO:2001021	negative regulation of response to DNA damage stimulus	1/96	74/23328	0.263344	0.343806	0.253936	Cxcl12	1
GO:0042306	BP	GO:0042306	regulation of protein import into nucleus	1/96	75/23328	0.266385	0.346806	0.256152	Bag3	1
GO:0046626	BP	GO:0046626	regulation of insulin receptor signaling pathway	1/96	75/23328	0.266385	0.346806	0.256152	Socs3	1
GO:0051057	BP	GO:0051057	positive regulation of small GTPase mediated signal transduction	1/96	75/23328	0.266385	0.346806	0.256152	Gpr17	1
GO:0097755	BP	GO:0097755	positive regulation of blood vessel diameter	1/96	75/23328	0.266385	0.346806	0.256152	Gch1	1
GO:1903725	BP	GO:1903725	regulation of phospholipid metabolic process	1/96	75/23328	0.266385	0.346806	0.256152	Flt1	1
GO:0007264	BP	GO:0007264	small GTPase mediated signal transduction	3/96	437/23328	0.268293	0.349095	0.257842	Gpr17/Jun/Rassf1	3
GO:0007187	BP	GO:0007187	G protein-coupled receptor signaling pathway, coupled to cyclic nucleotide second messenger	2/96	246/23328	0.268804	0.349371	0.258046	Ramp2/Akap12	2
GO:0010466	BP	GO:0010466	negative regulation of peptidase activity	2/96	246/23328	0.268804	0.349371	0.258046	Avp/Timp1	2
GO:0000079	BP	GO:0000079	regulation of cyclin-dependent protein serine/threonine kinase activity	1/96	76/23328	0.269414	0.349579	0.2582	Cdkn1a	1
GO:0006094	BP	GO:0006094	gluconeogenesis	1/96	76/23328	0.269414	0.349579	0.2582	Atf3	1
GO:0031060	BP	GO:0031060	regulation of histone methylation	1/96	76/23328	0.269414	0.349579	0.2582	Lmna	1
GO:0051606	BP	GO:0051606	detection of stimulus	2/96	247/23328	0.270329	0.350572	0.258933	Cxcl12/Tlr2	2
GO:0002697	BP	GO:0002697	regulation of immune effector process	3/96	440/23328	0.271635	0.352069	0.260039	Tlr2/Nfkbiz/Cxcl1	3
GO:0006809	BP	GO:0006809	nitric oxide biosynthetic process	1/96	77/23328	0.27243	0.352317	0.260222	Tlr2	1
GO:0016575	BP	GO:0016575	histone deacetylation	1/96	77/23328	0.27243	0.352317	0.260222	Per1	1
GO:0045453	BP	GO:0045453	bone resorption	1/96	77/23328	0.27243	0.352317	0.260222	Csk	1
GO:0045843	BP	GO:0045843	negative regulation of striated muscle tissue development	1/96	77/23328	0.27243	0.352317	0.260222	Bdnf	1
GO:1901361	BP	GO:1901361	organic cyclic compound catabolic process	3/96	442/23328	0.273865	0.353976	0.261448	Zfp36l1/Pde4d/Zfp36	3
GO:0031330	BP	GO:0031330	negative regulation of cellular catabolic process	2/96	250/23328	0.274904	0.354825	0.262075	Zfp36/Timp1	2
GO:0019229	BP	GO:0019229	regulation of vasoconstriction	1/96	78/23328	0.275434	0.354825	0.262075	Avp	1
GO:0046718	BP	GO:0046718	viral entry into host cell	1/96	78/23328	0.275434	0.354825	0.262075	Uvrag	1
GO:0060563	BP	GO:0060563	neuroepithelial cell differentiation	1/96	78/23328	0.275434	0.354825	0.262075	Cebpb	1
GO:0061180	BP	GO:0061180	mammary gland epithelium development	1/96	78/23328	0.275434	0.354825	0.262075	Cebpb	1
GO:0072332	BP	GO:0072332	intrinsic apoptotic signaling pathway by p53 class mediator	1/96	78/23328	0.275434	0.354825	0.262075	Cdkn1a	1
GO:0002460	BP	GO:0002460	adaptive immune response based on somatic recombination of immune receptors built from immunoglobulin superfamily domains	3/96	445/23328	0.277215	0.356922	0.263623	Prf1/Nfkbiz/Gadd45g	3
GO:0019319	BP	GO:0019319	hexose biosynthetic process	1/96	79/23328	0.278426	0.357298	0.263901	Atf3	1
GO:0034644	BP	GO:0034644	cellular response to UV	1/96	79/23328	0.278426	0.357298	0.263901	Cdkn1a	1
GO:0045471	BP	GO:0045471	response to ethanol	1/96	79/23328	0.278426	0.357298	0.263901	Ccl7	1
GO:0048635	BP	GO:0048635	negative regulation of muscle organ development	1/96	79/23328	0.278426	0.357298	0.263901	Bdnf	1
GO:0051279	BP	GO:0051279	regulation of release of sequestered calcium ion into cytosol	1/96	79/23328	0.278426	0.357298	0.263901	Pde4d	1
GO:0051781	BP	GO:0051781	positive regulation of cell division	1/96	79/23328	0.278426	0.357298	0.263901	Il1a	1
GO:0006401	BP	GO:0006401	RNA catabolic process	2/96	254/23328	0.281002	0.359146	0.265266	Zfp36l1/Zfp36	2
GO:1903362	BP	GO:1903362	regulation of cellular protein catabolic process	2/96	254/23328	0.281002	0.359146	0.265266	Cbfa2t3/Hspa1a	2
GO:0010923	BP	GO:0010923	negative regulation of phosphatase activity	1/96	80/23328	0.281406	0.359146	0.265266	Ppp1r15a	1
GO:0030641	BP	GO:0030641	regulation of cellular pH	1/96	80/23328	0.281406	0.359146	0.265266	Avp	1
GO:0032465	BP	GO:0032465	regulation of cytokinesis	1/96	80/23328	0.281406	0.359146	0.265266	Uvrag	1
GO:0032729	BP	GO:0032729	positive regulation of interferon-gamma production	1/96	80/23328	0.281406	0.359146	0.265266	Cd14	1
GO:0051965	BP	GO:0051965	positive regulation of synapse assembly	1/96	80/23328	0.281406	0.359146	0.265266	Bdnf	1
GO:0060968	BP	GO:0060968	regulation of gene silencing	1/96	80/23328	0.281406	0.359146	0.265266	Zfp36	1
GO:1901862	BP	GO:1901862	negative regulation of muscle tissue development	1/96	80/23328	0.281406	0.359146	0.265266	Bdnf	1
GO:1904029	BP	GO:1904029	regulation of cyclin-dependent protein kinase activity	1/96	80/23328	0.281406	0.359146	0.265266	Cdkn1a	1
GO:0022904	BP	GO:0022904	respiratory electron transport chain	1/96	81/23328	0.284373	0.361944	0.267332	Bdnf	1
GO:0032204	BP	GO:0032204	regulation of telomere maintenance	1/96	81/23328	0.284373	0.361944	0.267332	Lmna	1
GO:0046209	BP	GO:0046209	nitric oxide metabolic process	1/96	81/23328	0.284373	0.361944	0.267332	Tlr2	1
GO:0051785	BP	GO:0051785	positive regulation of nuclear division	1/96	81/23328	0.284373	0.361944	0.267332	Il1a	1
GO:1904589	BP	GO:1904589	regulation of protein import	1/96	81/23328	0.284373	0.361944	0.267332	Bag3	1
GO:0032886	BP	GO:0032886	regulation of microtubule-based process	2/96	258/23328	0.287097	0.364314	0.269083	Rassf1/Hspa1a	2
GO:0048738	BP	GO:0048738	cardiac muscle tissue development	2/96	258/23328	0.287097	0.364314	0.269083	Mef2a/Lmna	2
GO:0001912	BP	GO:0001912	positive regulation of leukocyte mediated cytotoxicity	1/96	82/23328	0.287328	0.364314	0.269083	Cxcl1	1
GO:0030193	BP	GO:0030193	regulation of blood coagulation	1/96	82/23328	0.287328	0.364314	0.269083	Thbd	1
GO:0032370	BP	GO:0032370	positive regulation of lipid transport	1/96	82/23328	0.287328	0.364314	0.269083	Il1a	1
GO:0044409	BP	GO:0044409	entry into host	1/96	82/23328	0.287328	0.364314	0.269083	Uvrag	1
GO:1901019	BP	GO:1901019	regulation of calcium ion transmembrane transporter activity	1/96	82/23328	0.287328	0.364314	0.269083	Pde4d	1
GO:0051091	BP	GO:0051091	positive regulation of DNA-binding transcription factor activity	2/96	260/23328	0.290142	0.366254	0.270516	Tlr2/Bdnf	2
GO:0002532	BP	GO:0002532	production of molecular mediator involved in inflammatory response	1/96	83/23328	0.290271	0.366254	0.270516	Per1	1
GO:0003333	BP	GO:0003333	amino acid transmembrane transport	1/96	83/23328	0.290271	0.366254	0.270516	Slc38a5	1
GO:0032272	BP	GO:0032272	negative regulation of protein polymerization	1/96	83/23328	0.290271	0.366254	0.270516	Tlr2	1
GO:0044106	BP	GO:0044106	cellular amine metabolic process	1/96	83/23328	0.290271	0.366254	0.270516	Sat1	1
GO:0046323	BP	GO:0046323	glucose import	1/96	83/23328	0.290271	0.366254	0.270516	Mef2a	1
GO:0051899	BP	GO:0051899	membrane depolarization	1/96	83/23328	0.290271	0.366254	0.270516	Jun	1
GO:1900046	BP	GO:1900046	regulation of hemostasis	1/96	83/23328	0.290271	0.366254	0.270516	Thbd	1
GO:1903901	BP	GO:1903901	negative regulation of viral life cycle	1/96	83/23328	0.290271	0.366254	0.270516	Oasl2	1
GO:0002703	BP	GO:0002703	regulation of leukocyte mediated immunity	2/96	261/23328	0.291665	0.367813	0.271667	Tlr2/Cxcl1	2
GO:0003151	BP	GO:0003151	outflow tract morphogenesis	1/96	84/23328	0.293203	0.368756	0.272364	Jun	1
GO:0006942	BP	GO:0006942	regulation of striated muscle contraction	1/96	84/23328	0.293203	0.368756	0.272364	Pde4d	1
GO:0022900	BP	GO:0022900	electron transport chain	1/96	84/23328	0.293203	0.368756	0.272364	Bdnf	1
GO:0043154	BP	GO:0043154	negative regulation of cysteine-type endopeptidase activity involved in apoptotic process	1/96	84/23328	0.293203	0.368756	0.272364	Avp	1
GO:0070830	BP	GO:0070830	bicellular tight junction assembly	1/96	84/23328	0.293203	0.368756	0.272364	Ramp2	1
GO:0002718	BP	GO:0002718	regulation of cytokine production involved in immune response	1/96	85/23328	0.296122	0.37156	0.274435	Tlr2	1
GO:0046364	BP	GO:0046364	monosaccharide biosynthetic process	1/96	85/23328	0.296122	0.37156	0.274435	Atf3	1
GO:0048524	BP	GO:0048524	positive regulation of viral process	1/96	85/23328	0.296122	0.37156	0.274435	Jun	1
GO:0051937	BP	GO:0051937	catecholamine transport	1/96	85/23328	0.296122	0.37156	0.274435	Cxcl12	1
GO:0045926	BP	GO:0045926	negative regulation of growth	2/96	264/23328	0.296229	0.37156	0.274435	Cdkn1a/Sertad1	2
GO:0042742	BP	GO:0042742	defense response to bacterium	3/96	464/23328	0.298517	0.373466	0.275843	Cebpb/Tlr2/Lcn2	3
GO:0006970	BP	GO:0006970	response to osmotic stress	1/96	86/23328	0.299029	0.373466	0.275843	Zfp36l1	1
GO:0031646	BP	GO:0031646	positive regulation of nervous system process	1/96	86/23328	0.299029	0.373466	0.275843	Egr2	1
GO:0050818	BP	GO:0050818	regulation of coagulation	1/96	86/23328	0.299029	0.373466	0.275843	Thbd	1
GO:0097581	BP	GO:0097581	lamellipodium organization	1/96	86/23328	0.299029	0.373466	0.275843	Pmp22	1
GO:0120192	BP	GO:0120192	tight junction assembly	1/96	86/23328	0.299029	0.373466	0.275843	Ramp2	1
GO:1905897	BP	GO:1905897	regulation of response to endoplasmic reticulum stress	1/96	86/23328	0.299029	0.373466	0.275843	Ppp1r15a	1
GO:2001057	BP	GO:2001057	reactive nitrogen species metabolic process	1/96	86/23328	0.299029	0.373466	0.275843	Tlr2	1
GO:1903311	BP	GO:1903311	regulation of mRNA metabolic process	2/96	266/23328	0.29927	0.373567	0.275917	Zfp36l1/Zfp36	2
GO:0048588	BP	GO:0048588	developmental cell growth	2/96	267/23328	0.30079	0.375263	0.27717	Cxcl12/Bdnf	2
GO:0034103	BP	GO:0034103	regulation of tissue remodeling	1/96	87/23328	0.301924	0.376276	0.277918	Csk	1
GO:0060420	BP	GO:0060420	regulation of heart growth	1/96	87/23328	0.301924	0.376276	0.277918	Dusp6	1
GO:0048193	BP	GO:0048193	Golgi vesicle transport	2/96	268/23328	0.302309	0.376555	0.278124	Csk/Uvrag	2
GO:0010827	BP	GO:0010827	regulation of glucose transmembrane transport	1/96	88/23328	0.304808	0.378253	0.279379	Mef2a	1
GO:0034502	BP	GO:0034502	protein localization to chromosome	1/96	88/23328	0.304808	0.378253	0.279379	Cenpa	1
GO:0062207	BP	GO:0062207	regulation of pattern recognition receptor signaling pathway	1/96	88/23328	0.304808	0.378253	0.279379	Tlr2	1
GO:1900182	BP	GO:1900182	positive regulation of protein localization to nucleus	1/96	88/23328	0.304808	0.378253	0.279379	Bag3	1
GO:1901992	BP	GO:1901992	positive regulation of mitotic cell cycle phase transition	1/96	88/23328	0.304808	0.378253	0.279379	Adamts1	1
GO:1903312	BP	GO:1903312	negative regulation of mRNA metabolic process	1/96	88/23328	0.304808	0.378253	0.279379	Zfp36	1
GO:1904063	BP	GO:1904063	negative regulation of cation transmembrane transport	1/96	88/23328	0.304808	0.378253	0.279379	Slc30a1	1
GO:0009306	BP	GO:0009306	protein secretion	3/96	470/23328	0.305268	0.378317	0.279426	Tlr2/Il1a/Cd14	3
GO:0010498	BP	GO:0010498	proteasomal protein catabolic process	3/96	470/23328	0.305268	0.378317	0.279426	Cbfa2t3/Pmp22/Hspa1a	3
GO:0050864	BP	GO:0050864	regulation of B cell activation	2/96	270/23328	0.305346	0.378317	0.279426	Zfp36l1/Cdkn1a	2
GO:0035592	BP	GO:0035592	establishment of protein localization to extracellular region	3/96	471/23328	0.306394	0.379414	0.280236	Tlr2/Il1a/Cd14	3
GO:0006605	BP	GO:0006605	protein targeting	2/96	271/23328	0.306863	0.379596	0.28037	Bag3/Akap12	2
GO:0045666	BP	GO:0045666	positive regulation of neuron differentiation	3/96	472/23328	0.30752	0.379596	0.28037	Cxcl12/Bdnf/Adamts1	3
GO:0001656	BP	GO:0001656	metanephros development	1/96	89/23328	0.307679	0.379596	0.28037	Egr1	1
GO:0042490	BP	GO:0042490	mechanoreceptor differentiation	1/96	89/23328	0.307679	0.379596	0.28037	Bdnf	1
GO:0042770	BP	GO:0042770	signal transduction in response to DNA damage	1/96	89/23328	0.307679	0.379596	0.28037	Cdkn1a	1
GO:0051149	BP	GO:0051149	positive regulation of muscle cell differentiation	1/96	89/23328	0.307679	0.379596	0.28037	Cxcl12	1
GO:0070301	BP	GO:0070301	cellular response to hydrogen peroxide	1/96	89/23328	0.307679	0.379596	0.28037	Lcn2	1
GO:0009593	BP	GO:0009593	detection of chemical stimulus	1/96	90/23328	0.310539	0.382316	0.282379	Tlr2	1
GO:0046888	BP	GO:0046888	negative regulation of hormone secretion	1/96	90/23328	0.310539	0.382316	0.282379	Osm	1
GO:1900076	BP	GO:1900076	regulation of cellular response to insulin stimulus	1/96	90/23328	0.310539	0.382316	0.282379	Socs3	1
GO:1903035	BP	GO:1903035	negative regulation of response to wounding	1/96	90/23328	0.310539	0.382316	0.282379	Thbd	1
GO:0060560	BP	GO:0060560	developmental growth involved in morphogenesis	2/96	275/23328	0.312927	0.38501	0.284369	Cxcl12/Bdnf	2
GO:0120193	BP	GO:0120193	tight junction organization	1/96	91/23328	0.313388	0.38501	0.284369	Ramp2	1
GO:1900407	BP	GO:1900407	regulation of cellular response to oxidative stress	1/96	91/23328	0.313388	0.38501	0.284369	Gch1	1
GO:2000117	BP	GO:2000117	negative regulation of cysteine-type endopeptidase activity	1/96	91/23328	0.313388	0.38501	0.284369	Avp	1
GO:0071692	BP	GO:0071692	protein localization to extracellular region	3/96	478/23328	0.31428	0.385903	0.285029	Tlr2/Il1a/Cd14	3
GO:0003007	BP	GO:0003007	heart morphogenesis	2/96	277/23328	0.315956	0.387068	0.285889	Jun/Adamts1	2
GO:0008037	BP	GO:0008037	cell recognition	2/96	277/23328	0.315956	0.387068	0.285889	Prf1/Bdnf	2
GO:0050807	BP	GO:0050807	regulation of synapse organization	2/96	277/23328	0.315956	0.387068	0.285889	Tlr2/Bdnf	2
GO:0000045	BP	GO:0000045	autophagosome assembly	1/96	92/23328	0.316224	0.387068	0.285889	Bag3	1
GO:0043900	BP	GO:0043900	regulation of multi-organism process	1/96	92/23328	0.316224	0.387068	0.285889	Timp1	1
GO:0055072	BP	GO:0055072	iron ion homeostasis	1/96	92/23328	0.316224	0.387068	0.285889	Lcn2	1
GO:0010506	BP	GO:0010506	regulation of autophagy	2/96	278/23328	0.317469	0.388387	0.286863	Bag3/Tlr2	2
GO:0006281	BP	GO:0006281	DNA repair	3/96	481/23328	0.317663	0.388421	0.286888	Uvrag/Ier3/Hspa1a	3
GO:0009308	BP	GO:0009308	amine metabolic process	1/96	93/23328	0.319049	0.389097	0.287388	Sat1	1
GO:0035305	BP	GO:0035305	negative regulation of dephosphorylation	1/96	93/23328	0.319049	0.389097	0.287388	Ppp1r15a	1
GO:0043297	BP	GO:0043297	apical junction assembly	1/96	93/23328	0.319049	0.389097	0.287388	Ramp2	1
GO:0045445	BP	GO:0045445	myoblast differentiation	1/96	93/23328	0.319049	0.389097	0.287388	Zfp36l1	1
GO:0072655	BP	GO:0072655	establishment of protein localization to mitochondrion	1/96	93/23328	0.319049	0.389097	0.287388	Bag3	1
GO:0015908	BP	GO:0015908	fatty acid transport	1/96	94/23328	0.321863	0.391913	0.289468	Il1a	1
GO:0061640	BP	GO:0061640	cytoskeleton-dependent cytokinesis	1/96	94/23328	0.321863	0.391913	0.289468	Cenpa	1
GO:0070252	BP	GO:0070252	actin-mediated cell contraction	1/96	94/23328	0.321863	0.391913	0.289468	Pde4d	1
GO:0070588	BP	GO:0070588	calcium ion transmembrane transport	2/96	282/23328	0.323513	0.393717	0.2908	Pde4d/Slc25a25	2
GO:0007229	BP	GO:0007229	integrin-mediated signaling pathway	1/96	95/23328	0.324665	0.394707	0.291531	Timp1	1
GO:2001243	BP	GO:2001243	negative regulation of intrinsic apoptotic signaling pathway	1/96	95/23328	0.324665	0.394707	0.291531	Cxcl12	1
GO:0060021	BP	GO:0060021	roof of mouth development	1/96	96/23328	0.327455	0.397685	0.293731	Csrnp1	1
GO:0098876	BP	GO:0098876	vesicle-mediated transport to the plasma membrane	1/96	96/23328	0.327455	0.397685	0.293731	Csk	1
GO:0002366	BP	GO:0002366	leukocyte activation involved in immune response	2/96	285/23328	0.328038	0.398186	0.294101	Nfkbiz/Gadd45g	2
GO:0006885	BP	GO:0006885	regulation of pH	1/96	97/23328	0.330234	0.399604	0.295148	Avp	1
GO:0010660	BP	GO:0010660	regulation of muscle cell apoptotic process	1/96	97/23328	0.330234	0.399604	0.295148	Bag3	1
GO:0019217	BP	GO:0019217	regulation of fatty acid metabolic process	1/96	97/23328	0.330234	0.399604	0.295148	Avp	1
GO:0045069	BP	GO:0045069	regulation of viral genome replication	1/96	97/23328	0.330234	0.399604	0.295148	Oasl2	1
GO:0099072	BP	GO:0099072	regulation of postsynaptic membrane neurotransmitter receptor levels	1/96	97/23328	0.330234	0.399604	0.295148	Nptx2	1
GO:1905037	BP	GO:1905037	autophagosome organization	1/96	97/23328	0.330234	0.399604	0.295148	Bag3	1
GO:0006892	BP	GO:0006892	post-Golgi vesicle-mediated transport	1/96	98/23328	0.333002	0.402327	0.29716	Csk	1
GO:0070585	BP	GO:0070585	protein localization to mitochondrion	1/96	98/23328	0.333002	0.402327	0.29716	Bag3	1
GO:0071482	BP	GO:0071482	cellular response to light stimulus	1/96	98/23328	0.333002	0.402327	0.29716	Cdkn1a	1
GO:0002263	BP	GO:0002263	cell activation involved in immune response	2/96	289/23328	0.334059	0.403187	0.297795	Nfkbiz/Gadd45g	2
GO:0050803	BP	GO:0050803	regulation of synapse structure or activity	2/96	289/23328	0.334059	0.403187	0.297795	Tlr2/Bdnf	2
GO:0007200	BP	GO:0007200	phospholipase C-activating G protein-coupled receptor signaling pathway	1/96	99/23328	0.335759	0.40461	0.298846	Gpr17	1
GO:0070167	BP	GO:0070167	regulation of biomineral tissue development	1/96	99/23328	0.335759	0.40461	0.298846	Cebpb	1
GO:0110149	BP	GO:0110149	regulation of biomineralization	1/96	99/23328	0.335759	0.40461	0.298846	Cebpb	1
GO:0002831	BP	GO:0002831	regulation of response to biotic stimulus	2/96	291/23328	0.337064	0.405974	0.299853	Tlr2/Cxcl1	2
GO:0006476	BP	GO:0006476	protein deacetylation	1/96	100/23328	0.338504	0.406523	0.300258	Per1	1
GO:0050795	BP	GO:0050795	regulation of behavior	1/96	100/23328	0.338504	0.406523	0.300258	Pmch	1
GO:0098659	BP	GO:0098659	inorganic cation import across plasma membrane	1/96	100/23328	0.338504	0.406523	0.300258	Slc30a1	1
GO:0099587	BP	GO:0099587	inorganic ion import across plasma membrane	1/96	100/23328	0.338504	0.406523	0.300258	Slc30a1	1
GO:1902882	BP	GO:1902882	regulation of response to oxidative stress	1/96	100/23328	0.338504	0.406523	0.300258	Gch1	1
GO:0044262	BP	GO:0044262	cellular carbohydrate metabolic process	2/96	292/23328	0.338565	0.406523	0.300258	Cbfa2t3/Ier3	2
GO:0006352	BP	GO:0006352	DNA-templated transcription, initiation	1/96	101/23328	0.341238	0.408679	0.301851	Jun	1
GO:0006906	BP	GO:0006906	vesicle fusion	1/96	101/23328	0.341238	0.408679	0.301851	Uvrag	1
GO:0007041	BP	GO:0007041	lysosomal transport	1/96	101/23328	0.341238	0.408679	0.301851	Hspa1a	1
GO:0031058	BP	GO:0031058	positive regulation of histone modification	1/96	101/23328	0.341238	0.408679	0.301851	Lmna	1
GO:2001237	BP	GO:2001237	negative regulation of extrinsic apoptotic signaling pathway	1/96	101/23328	0.341238	0.408679	0.301851	Lmna	1
GO:0072659	BP	GO:0072659	protein localization to plasma membrane	2/96	295/23328	0.343063	0.410654	0.30331	Csk/Ramp2	2
GO:0001704	BP	GO:0001704	formation of primary germ layer	1/96	102/23328	0.34396	0.410675	0.303326	Dusp1	1
GO:0007006	BP	GO:0007006	mitochondrial membrane organization	1/96	102/23328	0.34396	0.410675	0.303326	Ier3	1
GO:0010657	BP	GO:0010657	muscle cell apoptotic process	1/96	102/23328	0.34396	0.410675	0.303326	Bag3	1
GO:0035418	BP	GO:0035418	protein localization to synapse	1/96	102/23328	0.34396	0.410675	0.303326	Nptx2	1
GO:1901989	BP	GO:1901989	positive regulation of cell cycle phase transition	1/96	102/23328	0.34396	0.410675	0.303326	Adamts1	1
GO:0010522	BP	GO:0010522	regulation of calcium ion transport into cytosol	1/96	103/23328	0.346672	0.412857	0.304937	Pde4d	1
GO:0030004	BP	GO:0030004	cellular monovalent inorganic cation homeostasis	1/96	103/23328	0.346672	0.412857	0.304937	Avp	1
GO:0031123	BP	GO:0031123	RNA 3'-end processing	1/96	103/23328	0.346672	0.412857	0.304937	Zfp36l1	1
GO:0042310	BP	GO:0042310	vasoconstriction	1/96	103/23328	0.346672	0.412857	0.304937	Avp	1
GO:0046427	BP	GO:0046427	positive regulation of receptor signaling pathway via JAK-STAT	1/96	103/23328	0.346672	0.412857	0.304937	Osm	1
GO:0009416	BP	GO:0009416	response to light stimulus	2/96	298/23328	0.347551	0.413692	0.305553	Per1/Cdkn1a	2
GO:0046394	BP	GO:0046394	carboxylic acid biosynthetic process	2/96	299/23328	0.349044	0.41396	0.305751	Avp/Gch1	2
GO:0001657	BP	GO:0001657	ureteric bud development	1/96	104/23328	0.349373	0.41396	0.305751	Bdnf	1
GO:0006413	BP	GO:0006413	translational initiation	1/96	104/23328	0.349373	0.41396	0.305751	Ppp1r15a	1
GO:0015844	BP	GO:0015844	monoamine transport	1/96	104/23328	0.349373	0.41396	0.305751	Cxcl12	1
GO:0034766	BP	GO:0034766	negative regulation of ion transmembrane transport	1/96	104/23328	0.349373	0.41396	0.305751	Slc30a1	1
GO:0046849	BP	GO:0046849	bone remodeling	1/96	104/23328	0.349373	0.41396	0.305751	Csk	1
GO:0052126	BP	GO:0052126	movement in host environment	1/96	104/23328	0.349373	0.41396	0.305751	Uvrag	1
GO:0072163	BP	GO:0072163	mesonephric epithelium development	1/96	104/23328	0.349373	0.41396	0.305751	Bdnf	1
GO:0072164	BP	GO:0072164	mesonephric tubule development	1/96	104/23328	0.349373	0.41396	0.305751	Bdnf	1
GO:0016053	BP	GO:0016053	organic acid biosynthetic process	2/96	300/23328	0.350537	0.415128	0.306615	Avp/Gch1	2
GO:0001910	BP	GO:0001910	regulation of leukocyte mediated cytotoxicity	1/96	105/23328	0.352062	0.4163	0.30748	Cxcl1	1
GO:0002444	BP	GO:0002444	myeloid leukocyte mediated immunity	1/96	105/23328	0.352062	0.4163	0.30748	Cxcl1	1
GO:1905954	BP	GO:1905954	positive regulation of lipid localization	1/96	105/23328	0.352062	0.4163	0.30748	Il1a	1
GO:0035282	BP	GO:0035282	segmentation	1/96	106/23328	0.354741	0.419255	0.309663	Egr2	1
GO:0030111	BP	GO:0030111	regulation of Wnt signaling pathway	2/96	304/23328	0.356497	0.421117	0.311038	Egr1/Tlr2	2
GO:0001823	BP	GO:0001823	mesonephros development	1/96	107/23328	0.357408	0.421128	0.311046	Bdnf	1
GO:0002367	BP	GO:0002367	cytokine production involved in immune response	1/96	107/23328	0.357408	0.421128	0.311046	Tlr2	1
GO:0090174	BP	GO:0090174	organelle membrane fusion	1/96	107/23328	0.357408	0.421128	0.311046	Uvrag	1
GO:1903426	BP	GO:1903426	regulation of reactive oxygen species biosynthetic process	1/96	107/23328	0.357408	0.421128	0.311046	Tlr2	1
GO:1904894	BP	GO:1904894	positive regulation of receptor signaling pathway via STAT	1/96	107/23328	0.357408	0.421128	0.311046	Osm	1
GO:0050954	BP	GO:0050954	sensory perception of mechanical stimulus	2/96	305/23328	0.357983	0.421593	0.311389	Cxcl12/Gjb2	2
GO:0016358	BP	GO:0016358	dendrite development	2/96	306/23328	0.359469	0.422763	0.312254	Mef2a/Bdnf	2
GO:0006119	BP	GO:0006119	oxidative phosphorylation	1/96	108/23328	0.360065	0.422763	0.312254	Bdnf	1
GO:0008306	BP	GO:0008306	associative learning	1/96	108/23328	0.360065	0.422763	0.312254	Nptx2	1
GO:0032091	BP	GO:0032091	negative regulation of protein binding	1/96	108/23328	0.360065	0.422763	0.312254	Cdkn1a	1
GO:0034754	BP	GO:0034754	cellular hormone metabolic process	1/96	108/23328	0.360065	0.422763	0.312254	Egr1	1
GO:0043266	BP	GO:0043266	regulation of potassium ion transport	1/96	108/23328	0.360065	0.422763	0.312254	Cxcl1	1
GO:0002702	BP	GO:0002702	positive regulation of production of molecular mediator of immune response	1/96	109/23328	0.36271	0.425014	0.313916	Tlr2	1
GO:0051209	BP	GO:0051209	release of sequestered calcium ion into cytosol	1/96	109/23328	0.36271	0.425014	0.313916	Pde4d	1
GO:0051897	BP	GO:0051897	positive regulation of protein kinase B signaling	1/96	109/23328	0.36271	0.425014	0.313916	Osm	1
GO:0097756	BP	GO:0097756	negative regulation of blood vessel diameter	1/96	109/23328	0.36271	0.425014	0.313916	Avp	1
GO:0006275	BP	GO:0006275	regulation of DNA replication	1/96	110/23328	0.365345	0.427029	0.315405	Jun	1
GO:0045089	BP	GO:0045089	positive regulation of innate immune response	1/96	110/23328	0.365345	0.427029	0.315405	Tlr2	1
GO:0048709	BP	GO:0048709	oligodendrocyte differentiation	1/96	110/23328	0.365345	0.427029	0.315405	Tlr2	1
GO:0051283	BP	GO:0051283	negative regulation of sequestering of calcium ion	1/96	110/23328	0.365345	0.427029	0.315405	Pde4d	1
GO:2000106	BP	GO:2000106	regulation of leukocyte apoptotic process	1/96	110/23328	0.365345	0.427029	0.315405	Cxcl12	1
GO:0090596	BP	GO:0090596	sensory organ morphogenesis	2/96	311/23328	0.366879	0.428608	0.31657	Flt1/Bdnf	2
GO:0032963	BP	GO:0032963	collagen metabolic process	1/96	111/23328	0.367969	0.429022	0.316876	Errfi1	1
[truncated: 761 more rows]
